# Supplementary material for: Physiological and molecular insights into drought-induced memory in potato leaves
Source: Research Square preprint supplement (doi:10.21203/rs.3.rs-6670849/v1), 2025-06-13
Supplement: Supplementary file 1 [file 090c13cf66fd6b9b52ae7919.xlsx]

## Sheet: TableS1
Table S1. Summary of transcriptome sequencing results.
Plant	Treatment	Year	Number of cleand PE reads	Proper-pairs	Percent of uniquely mapped reads	SRA
Cayuga-2-KI	NPr	2022	74040807	67624810	91.47 %	SRR33436765
Cayuga-2-KII	NPr	2022	67332606	61708168	91.78 %	SRR33436757
Cayuga-2-KIII	NPr	2022	73074748	66731968	91.45 %	SRR33436758
Cayuga-2-SI	Pr	2022	73207576	66792250	91.34 %	SRR33436759
Cayuga-2-SII	Pr	2022	78056201	70864654	90.92 %	SRR33436760
Cayuga-2-SIII	Pr	2022	82629197	73366506	88.91 %	SRR33436761
Dalila-2-KII	NPr	2022	73059873	66613150	91.27 %	SRR33436762
Dalila-2-KIII	NPr	2022	75572141	68827942	91.18 %	SRR33436763
Dalila-2-SI	Pr	2022	75909007	69080180	91.15 %	SRR33436764
Dalila-2-SII	Pr	2022	94973983	87952226	92.74 %	SRR33436766
Dalila-2-SIII	Pr	2022	72991170	66275452	90.93 %	SRR33436767

## Sheet: TableS2
Table S2. Efect of drought-indued memory on Cayuga and Dalila plants analyzed by JIP test for chlorophyll fluorescence. The mean values ± SE (n = 9) and significance of tested parameters.
Tested parameters/ Cultivar/ANOVA	treatment	t tor Fm	Area	Fo	Fm	Fv	Fo/Fm	Fv/Fm	PI Inst	Fv/Fo	Vj	Vi
Cayuga	non-stressed (control)	158	18867	309	1629	1298	0,194	0,806	1,836	4,168	0,607	0,766
Dalila		146	17752	299	1545	1245	0,194	0,806	1,712	4,241	0,619	0,777
Cayuga	Drought-induced memory	146	17128	304	1475	1175	0,205	0,794	1,601	3,870	0,598	0,757
Dalila		164	23633	281	1645	1365	0,171	0,828	3,594	4,796	0,493	0,753
Cultivar		0,198	0,000	0,001	0,160	0,928	0,028	0,086	0,000	0,108	0,000	0,000
Treatment (control, primed memory)		0,198	0,000	0,000	0,029	0,001	0,000	0,000	0,000	0,000	0,000	0,237
Cultivar x Combination		0,805	0,000	0,035	0,000	0,000	0,000	0,000	0,000	0,000	0,000	0,014
Tested parameters/ Cultivar/ANOVA	treatment	∆VG/∆to	∆V/∆to	Sm	N	Sm/t(Fm)	ABS/RC	Dlo/RC	Tro/RC	Eto/RC	Reo/RC	phi(Po)
Cayuga	non-stressed (control)	0,271	0,628	14,464	15,141	0,093	1,2970	0,2503	1,0415	0,4062	0,2440	0,8058
Dalila		0,288	0,656	14,086	14,769	0,097	1,3298	0,2523	1,0682	0,4010	0,2339	0,8042
Cayuga	Drought-induced memory	0,286	0,644	14,647	15,738	0,101	1,3802	0,2795	1,0939	0,4369	0,2627	0,7943
Dalila		0,201	0,473	17,367	16,463	0,106	1,1412	0,1973	0,9441	0,4826	0,2313	0,8276
Cultivar		0,000	0,000	0,000	0,000	0,011	0,076	0,090	0,152	0,001	0,140	0,182
Treatment (control, induced memory)		0,000	0,000	0,000	0,435	0,102	0,001	0,000	0,017	0,194	0,000	0,001
Cultivar x Combination		0,000	0,000	0,000	0,019	0,884	0,000	0,000	0,001	0,105	0,055	0,000
Tested parameters/ Cultivar/ANOVA	treatment	psi(Eo)	phi(Eo)	delta(Ro)	phi(Ro)	ABS/Cso	Dlo/Cso	Tro/Cso	Eto/Cso	Reo/Cso	ABS/Csm	Dlo/Csm
Cayuga	non-stressed (control)	0.3924	0.3173	0.6224	0.1895	310.67	60.48	250.19	97.85	59.1	1606.67	310.67
Dalila		0.3801	0.3071	0.604	0.1768	301.22	59.43	241.79	90.95	53.26	1542.56	301.22
Cayuga	Drought-induced memory	0.4011	0.3187	0.6036	0.1918	304	62.56	241.44	96.89	58.33	1478.83	304
Dalila		0.512	0.4241	0.4826	0.2028	283.28	48.89	234.39	108.44	57.47	1646.83	283.28
Cultivar		0	0.001	0.036	0.003	0.022	0.064	0.018	0.214	0.36	0.627	0.022
Treatment (control, induced memory)		0.007	0.004	0.037	0.852	0.006	0.002	0.024	0.724	0.08	0.037	0.006
Cultivar x Combination		0.001	0.001	0.119	0.012	0.281	0.007	0.838	0.166	0.189	0	0.281
Tested parameters/ Cultivar/ANOVA	treatment	Tro/Csm	Eto/Csm	Reo/Csm	gamma(RC)/((1-gamma(RC))	PI ABS	dRo/(1-dRo)	PI total	DF ABS	DF Total
Cayuga	non-stressed (control)	1285	512.57	300.14	0.776	2.203	1.961	3.912	0.321	0.561
Dalila		1245	477	278.29	0.764	2.054	1.471	2.976	0.29	0.494
Cayuga	Drought-induced memory	1171	472.36	284.43	0.739	1.932	1.505	2.984	0.28	0.47
Dalila		1365	683.43	334.64	0.877	4.313	0.969	4.129	0.628	0.63
Cultivar		0.899	0	0.002	0.435	0	0.011	0.62	0	0.371
Treatment (control, induced memory)		0	0	0.022	0.036	0	0.007	0.645	0	0.066
Cultivar x Combination		0	0	0	0.008	0	0.898	0	0	0

## Sheet: TableS3
Table S3. Differentially expressed genes identified between Dalila control and drought-primed plants using DESeq2.
Gene	Fold change	Adjusted p-value	Description
dAg1_00000289	-3.75942	0.0232341	Similar to NDR1: Protein NDR1 (Arabidopsis thaliana OX%3D3702)
dAg1_00000353	-4.26049	0.000130843	Similar to LECRK2: G-type lectin S-receptor-like serine/threonine-protein kinase LECRK2 (Oryza sativa subsp. indica OX%3D39946)
dAg1_00000395	-7.9013	2.98056e-05	Similar to SYP121: Syntaxin-121 (Arabidopsis thaliana OX%3D3702)
dAg1_00000607	-4.21307	0.021231	Similar to PR5K: PR5-like receptor kinase (Arabidopsis thaliana OX%3D3702)
dAg1_00000608	-4.7136	0.0128822	Similar to PSBT: Photosystem II 5 kDa protein%2C chloroplastic (Arabidopsis thaliana OX%3D3702)
dAg1_00000623	-1.95224	0.0436588	Similar to NADK1: NAD(H) kinase 1 (Arabidopsis thaliana OX%3D3702)
dAg1_00000624	-5.06921	7.67883e-05	Similar to LRK10L-2.1: LEAF RUST 10 DISEASE-RESISTANCE LOCUS RECEPTOR-LIKE PROTEIN KINASE-like 2.1 (Arabidopsis thaliana OX%3D3702)
dAg1_00000625	-5.29608	3.80611e-07	Similar to LRK10L-2.4: LEAF RUST 10 DISEASE-RESISTANCE LOCUS RECEPTOR-LIKE PROTEIN KINASE-like 2.4 (Arabidopsis thaliana OX%3D3702)
dAg1_00000806	-3.54298	0.0219599	Protein of unknown function
dAg1_00000933	-2.2207	0.0234547	Similar to GILP: GSH-induced LITAF domain protein (Arabidopsis thaliana OX%3D3702)
dAg1_00000976	-2.64618	0.0206832	Similar to SAMDC3: S-adenosylmethionine decarboxylase proenzyme 3 (Arabidopsis thaliana OX%3D3702)
dAg1_00001233	-2.17394	0.0146132	Protein of unknown function
dAg1_00001401	-2.29675	0.0260822	Similar to Os02g0194200: Zinc finger CCCH domain-containing protein 14 (Oryza sativa subsp. japonica OX%3D39947)
dAg1_00002041	-5.6182	9.37505e-05	Similar to BOR2: Probable boron transporter 2 (Arabidopsis thaliana OX%3D3702)
dAg1_00002078	-2.16183	0.00694763	Similar to INVC: Alkaline/neutral invertase C%2C mitochondrial (Arabidopsis thaliana OX%3D3702)
dAg1_00002144	-2.22311	0.00258316	Similar to ECHIA: Probable enoyl-CoA hydratase 1%2C peroxisomal (Arabidopsis thaliana OX%3D3702)
dAg1_00002242	-17.0307	0.0314581	Similar to COBL7: COBRA-like protein 7 (Arabidopsis thaliana OX%3D3702)
dAg1_00002246	-2.54373	0.0017734	Protein of unknown function
dAg1_00002685	-2.58875	0.00088779	Similar to RHF1A: E3 ubiquitin-protein ligase RHF1A (Arabidopsis thaliana OX%3D3702)
dAg1_00002710	-2.43924	0.0442843	Similar to ERDJ3B: DnaJ protein ERDJ3B (Arabidopsis thaliana OX%3D3702)
dAg1_00002711	-4.72273	0.0082785	Similar to PLIP2: Phospholipase A1 PLIP2%2C chloroplastic (Arabidopsis thaliana OX%3D3702)
dAg1_00002992	-1.95154	0.015032	Similar to NFYA9: Nuclear transcription factor Y subunit A-9 (Arabidopsis thaliana OX%3D3702)
dAg1_00003116	-2.50306	0.00243829	Protein of unknown function
dAg1_00003117	-2.47293	0.00980253	Protein of unknown function
dAg1_00003250	-3.931	0.0127646	Protein of unknown function
dAg1_00003343	-2.62562	0.00694141	Protein of unknown function
dAg1_00003627	-5.25027	0.0128822	Similar to At2g46140: Desiccation-related protein At2g46140 (Arabidopsis thaliana OX%3D3702)
dAg1_00003676	-6.2928	1.58059e-05	Similar to WRKY41: Probable WRKY transcription factor 41 (Arabidopsis thaliana OX%3D3702)
dAg1_00003720	-2.18027	0.00806221	Similar to PI4KG4: Phosphatidylinositol 4-kinase gamma 4 (Arabidopsis thaliana OX%3D3702)
dAg1_00003747	-2.97873	0.000585203	Similar to PUB44: U-box domain-containing protein 44 (Arabidopsis thaliana OX%3D3702)
dAg1_00003779	-13.0814	0.000139847	Similar to SIB2: Sigma factor binding protein 2%2C chloroplastic (Arabidopsis thaliana OX%3D3702)
dAg1_00003868	-2.40083	0.0312776	Protein of unknown function
dAg1_00004000	-6.83664	0.0340419	Similar to RLP43: Receptor-like protein 43 (Arabidopsis thaliana OX%3D3702)
dAg1_00004036	-2.78308	0.00645122	Protein of unknown function
dAg1_00004038	-4.46364	2.21303e-07	Similar to At3g05170: Phosphoglycerate mutase-like protein AT74 (Arabidopsis thaliana OX%3D3702)
dAg1_00004040	-4.23541	1.34483e-07	Protein of unknown function
dAg1_00004050	-6.33461	0.0470266	Protein of unknown function
dAg1_00004076	-3.07185	0.00584191	Similar to PNC1: Peroxisomal adenine nucleotide carrier 1 (Arabidopsis thaliana OX%3D3702)
dAg1_00004140	-2.00913	0.0400902	Similar to At3g05500: REF/SRPP-like protein At3g05500 (Arabidopsis thaliana OX%3D3702)
dAg1_00004171	-5.05453	0.0338877	Protein of unknown function
dAg1_00004191	-7.02513	5.07181e-05	Protein of unknown function
dAg1_00004192	-11.9063	7.02422e-07	Similar to SCL11: Scarecrow-like protein 11 (Arabidopsis thaliana OX%3D3702)
dAg1_00004198	-5.25117	4.86197e-07	Similar to CBP60C: Calmodulin-binding protein 60 C (Arabidopsis thaliana OX%3D3702)
dAg1_00004281	-2.68569	0.0171939	Protein of unknown function
dAg1_00004377	-2.57741	0.0119858	Similar to At4g11170: Putative disease resistance protein At4g11170 (Arabidopsis thaliana OX%3D3702)
dAg1_00004704	-2.16794	0.0212398	Similar to LRR1: Leucine-rich repeat protein 1 (Arabidopsis thaliana OX%3D3702)
dAg1_00004705	-1.7289	0.0449213	Similar to BAK1: BRASSINOSTEROID INSENSITIVE 1-associated receptor kinase 1 (Arabidopsis thaliana OX%3D3702)
dAg1_00004729	-3.97766	0.0206415	Protein of unknown function
dAg1_00004738	-2.33913	0.00852762	Protein of unknown function
dAg1_00004751	-3.19772	0.0412446	Protein of unknown function
dAg1_00004772	-3.82338	0.00807461	Similar to RIBA1: Bifunctional riboflavin biosynthesis protein RIBA 1%2C chloroplastic (Arabidopsis thaliana OX%3D3702)
dAg1_00004946	-12.5441	0.0308191	Protein of unknown function
dAg1_00004977	-7.08693	0.0339806	Similar to PSK5: Phytosulfokines 5 (Arabidopsis thaliana OX%3D3702)
dAg1_00005035	-16.2359	9.37935e-08	Similar to RHY1A: Probable E3 ubiquitin-protein ligase RHY1A (Arabidopsis thaliana OX%3D3702)
dAg1_00005079	-15.8933	0.000153449	Similar to ERG1: Elicitor-responsive protein 1 (Oryza sativa subsp. indica OX%3D39946)
dAg1_00005084	-5.07639	0.00055552	Similar to UGT73B3: UDP-glycosyltransferase 73B3 (Arabidopsis thaliana OX%3D3702)
dAg1_00005222	-4.24437	0.000571919	Protein of unknown function
dAg1_00005223	-4.20932	4.41636e-05	Similar to XLG1: Extra-large guanine nucleotide-binding protein 1 (Arabidopsis thaliana OX%3D3702)
dAg1_00005263	-1.8614	0.0371498	Similar to PLT5: Polyol transporter 5 (Arabidopsis thaliana OX%3D3702)
dAg1_00005275	-2.83059	0.00458082	Similar to At4g34480: Glucan endo-1%2C3-beta-glucosidase 7 (Arabidopsis thaliana OX%3D3702)
dAg1_00005451	-6.75682	0.000272345	Similar to NFD4: Protein NUCLEAR FUSION DEFECTIVE 4 (Arabidopsis thaliana OX%3D3702)
dAg1_00005521	-9.10451	2.03343e-05	Similar to AATL1: Lysine histidine transporter-like 8 (Arabidopsis thaliana OX%3D3702)
dAg1_00005529	-1.62666	0.0275549	Similar to REL2: Protein ROLLING AND ERECT LEAF 2 (Oryza sativa subsp. japonica OX%3D39947)
dAg1_00005602	-3.51578	0.00947446	Similar to GSTL3: Glutathione S-transferase L3 (Arabidopsis thaliana OX%3D3702)
dAg1_00005605	-6.98927	0.000344707	Similar to GSTZ5: Protein IN2-1 homolog B (Oryza sativa subsp. japonica OX%3D39947)
dAg1_00005607	-5.96672	1.93886e-10	Similar to GSTU8: Glutathione S-transferase U8 (Arabidopsis thaliana OX%3D3702)
dAg1_00005647	-2.34315	0.00137797	Similar to IPCS2: Phosphatidylinositol:ceramide inositolphosphotransferase 2 (Arabidopsis thaliana OX%3D3702)
dAg1_00005679	-8.36504	0.000368952	Similar to OFUT28: O-fucosyltransferase 28 (Arabidopsis thaliana OX%3D3702)
dAg1_00005735	-1.94498	0.0128822	Similar to CLC2: Clathrin light chain 2 (Arabidopsis thaliana OX%3D3702)
dAg1_00005761	-4.4162	0.000579449	Protein of unknown function
dAg1_00005782	-3.54707	0.0393914	Similar to LECRK41: L-type lectin-domain containing receptor kinase IV.1 (Arabidopsis thaliana OX%3D3702)
dAg1_00005792	-9.04621	0.0132637	Similar to SMR4: Cyclin-dependent protein kinase inhibitor SMR4 (Arabidopsis thaliana OX%3D3702)
dAg1_00005803	-2.76265	0.000643362	Similar to PBL11: Probable serine/threonine-protein kinase PBL11 (Arabidopsis thaliana OX%3D3702)
dAg1_00005860	-2.73691	0.0263264	Similar to ARF31: B3 domain-containing protein At2g36080 (Arabidopsis thaliana OX%3D3702)
dAg1_00006168	-2.48606	0.000666234	Similar to PCRK1: Serine/threonine-protein kinase PCRK1 (Arabidopsis thaliana OX%3D3702)
dAg1_00006321	-2.17063	0.0236645	Similar to At5g02620: Ankyrin repeat-containing protein At5g02620 (Arabidopsis thaliana OX%3D3702)
dAg1_00006511	-9.4784	0.00154996	Similar to RLP6: Receptor-like protein 6 (Arabidopsis thaliana OX%3D3702)
dAg1_00006512	-4.60978	0.0305163	Similar to RLP7: Receptor-like protein 7 (Arabidopsis thaliana OX%3D3702)
dAg1_00006513	-4.70923	0.00675052	Protein of unknown function
dAg1_00006559	-5.23214	0.00174073	Similar to WAK3: Wall-associated receptor kinase 3 (Arabidopsis thaliana OX%3D3702)
dAg1_00006580	-24.9891	0.0129705	Similar to WRKY24: WRKY transcription factor WRKY24 (Oryza sativa subsp. japonica OX%3D39947)
dAg1_00006797	-7.15046	2.65451e-17	Similar to WRKY70: WRKY DNA-binding transcription factor 70 (Solanum lycopersicum OX%3D4081)
dAg1_00007292	-3.17468	0.0030793	Similar to SYNC2: Asparagine--tRNA ligase%2C cytoplasmic 2 (Arabidopsis thaliana OX%3D3702)
dAg1_00007417	-3.02522	0.001861	Similar to RIN4: RPM1-interacting protein 4 (Arabidopsis thaliana OX%3D3702)
dAg1_00007436	-1.98909	0.00640898	Similar to AOR: NADPH-dependent alkenal/one oxidoreductase%2C chloroplastic (Arabidopsis thaliana OX%3D3702)
dAg1_00007716	-3.16186	0.0382066	Protein of unknown function
dAg1_00007851	-2.36033	0.026808	Similar to LFG4: Protein LIFEGUARD 4 (Arabidopsis thaliana OX%3D3702)
dAg1_00008058	-4.85432	0.0249342	Similar to MIK2: MDIS1-interacting receptor like kinase 2 (Arabidopsis thaliana OX%3D3702)
dAg1_00008203	-2.09337	0.0353368	Similar to ABCC4: ABC transporter C family member 4 (Arabidopsis thaliana OX%3D3702)
dAg1_00008254	-1.82983	0.0498164	Similar to DI19-6: Protein DEHYDRATION-INDUCED 19 homolog 6 (Arabidopsis thaliana OX%3D3702)
dAg1_00008338	-23.4029	3.22072e-07	Protein of unknown function
dAg1_00008339	-15.4619	5.37787e-11	Protein of unknown function
dAg1_00008420	-9.85545	0.000294956	Protein of unknown function
dAg1_00008453	-2.54008	0.00806221	Similar to PUB24: U-box domain-containing protein 24 (Oryza sativa subsp. japonica OX%3D39947)
dAg1_00008469	-6.50396	0.0027145	Similar to At1g12460: Probable LRR receptor-like serine/threonine-protein kinase At1g12460 (Arabidopsis thaliana OX%3D3702)
dAg1_00008470	-2.29519	0.0232341	Similar to NFP: Serine/threonine receptor-like kinase NFP (Medicago truncatula OX%3D3880)
dAg1_00008561	-2.96323	0.00479284	Protein of unknown function
dAg1_00008579	-3.53187	0.0305163	Similar to MYB15: Transcription factor MYB15 (Arabidopsis thaliana OX%3D3702)
dAg1_00008794	-5.96294	6.05841e-12	Similar to ABCG40: ABC transporter G family member 40 (Arabidopsis thaliana OX%3D3702)
dAg1_00008846	-5.21903	0.00151814	Similar to LECRKS2: Receptor like protein kinase S.2 (Arabidopsis thaliana OX%3D3702)
dAg1_00008914	-9.00773	0.000128189	Similar to TAO1: Disease resistance protein TAO1 (Arabidopsis thaliana OX%3D3702)
dAg1_00008917	-9.52815	1.27917e-05	Similar to TAO1: Disease resistance protein TAO1 (Arabidopsis thaliana OX%3D3702)
dAg1_00008921	-3.54188	0.00166962	Protein of unknown function
dAg1_00008943	-4.97481	0.00835578	Similar to At4g11170: Putative disease resistance protein At4g11170 (Arabidopsis thaliana OX%3D3702)
dAg1_00008946	-3.37433	0.00556257	Similar to At4g27220: Probable disease resistance protein At4g27220 (Arabidopsis thaliana OX%3D3702)
dAg1_00009007	-15.2092	0.0355625	Protein of unknown function
dAg1_00009089	-2.33558	0.00348561	Similar to WIH2: Cysteine-rich and transmembrane domain-containing protein WIH2 (Arabidopsis thaliana OX%3D3702)
dAg1_00009129	-5.12378	0.000105083	Similar to 3MMP: Metalloendoproteinase 3-MMP (Arabidopsis thaliana OX%3D3702)
dAg1_00009144	-2.47884	0.00649905	Similar to PGD2: 6-phosphogluconate dehydrogenase%2C decarboxylating 2 (Arabidopsis thaliana OX%3D3702)
dAg1_00009189	-5.34033	0.00154021	Similar to NRP1: Nodulin-related protein 1 (Arabidopsis thaliana OX%3D3702)
dAg1_00009198	-3.39734	0.0155071	Similar to At1g61180: Probable disease resistance protein At1g61180 (Arabidopsis thaliana OX%3D3702)
dAg1_00009288	-1.94572	0.0308191	Similar to RPP8L2: Probable disease resistance RPP8-like protein 2 (Arabidopsis thaliana OX%3D3702)
dAg1_00009441	-4.3179	0.0165543	Similar to RHA2A: E3 ubiquitin-protein ligase RHA2A (Arabidopsis thaliana OX%3D3702)
dAg1_00009456	-19.1577	0.000633135	Protein of unknown function
dAg1_00009546	-3.13832	9.37505e-05	Similar to PCR2: Protein PLANT CADMIUM RESISTANCE 2 (Arabidopsis thaliana OX%3D3702)
dAg1_00009802	-5.78518	0.00130695	Similar to NAC002: NAC domain-containing protein 2 (Arabidopsis thaliana OX%3D3702)
dAg1_00010146	-3.11345	0.0226698	Similar to ERF1B: Ethylene-responsive transcription factor 1B (Arabidopsis thaliana OX%3D3702)
dAg1_00010509	-4.24487	0.0109586	Similar to MO1: Monooxygenase 1 (Arabidopsis thaliana OX%3D3702)
dAg1_00011071	-3.40585	0.000209137	Similar to CRT3: Calreticulin-3 (Arabidopsis thaliana OX%3D3702)
dAg1_00011401	-1.83057	0.0135774	Similar to CAMTA3: Calmodulin-binding transcription activator 3 (Arabidopsis thaliana OX%3D3702)
dAg1_00011540	-4.41462	1.68199e-06	Similar to At5g39000: Putative receptor-like protein kinase At5g39000 (Arabidopsis thaliana OX%3D3702)
dAg1_00011601	-17.1922	6.36938e-13	Similar to WRKY50: Probable WRKY transcription factor 50 (Arabidopsis thaliana OX%3D3702)
dAg1_00011819	-5.26264	0.00367768	Similar to MAPKKK3: Mitogen-activated protein kinase kinase kinase 3 (Arabidopsis thaliana OX%3D3702)
dAg1_00011864	-3.72262	0.0126409	Protein of unknown function
dAg1_00011866	-6.09787	0.0419508	Protein of unknown function
dAg1_00012068	-2.8173	0.0126409	Similar to Ras-related protein Rab7 (Glycine max OX%3D3847)
dAg1_00012079	-1.72735	0.0154972	Similar to NAC017: NAC domain-containing protein 17 (Arabidopsis thaliana OX%3D3702)
dAg1_00012170	-4.9678	0.000463692	Protein of unknown function
dAg1_00012171	-7.22015	0.00844793	Similar to MIK2: MDIS1-interacting receptor like kinase 2 (Arabidopsis thaliana OX%3D3702)
dAg1_00012172	-5.06027	0.000196127	Similar to BAM1: Leucine-rich repeat receptor-like serine/threonine-protein kinase BAM1 (Arabidopsis thaliana OX%3D3702)
dAg1_00012174	-3.50145	0.000460819	Similar to At1g35710: Probable leucine-rich repeat receptor-like protein kinase At1g35710 (Arabidopsis thaliana OX%3D3702)
dAg1_00012175	-3.31588	0.0132987	Similar to At5g63930: Probable leucine-rich repeat receptor-like protein kinase At5g63930 (Arabidopsis thaliana OX%3D3702)
dAg1_00012176	-3.29541	0.0173155	Protein of unknown function
dAg1_00012436	-3.24879	0.000370642	Similar to OPT4: Oligopeptide transporter 4 (Arabidopsis thaliana OX%3D3702)
dAg1_00012486	-9.87374	1.13237e-07	Similar to At4g27290: G-type lectin S-receptor-like serine/threonine-protein kinase At4g27290 (Arabidopsis thaliana OX%3D3702)
dAg1_00012499	-1.68633	0.0341307	Similar to At4g27290: G-type lectin S-receptor-like serine/threonine-protein kinase At4g27290 (Arabidopsis thaliana OX%3D3702)
dAg1_00012550	-1.95928	0.0085382	Similar to PUB4: U-box domain-containing protein 4 (Arabidopsis thaliana OX%3D3702)
dAg1_00012593	-5.42583	0.049753	Similar to CYP81F1: Cytochrome P450 81F1 (Arabidopsis thaliana OX%3D3702)
dAg1_00012708	-2.0145	0.0407443	Similar to MAPKKK5: Mitogen-activated protein kinase kinase kinase 5 (Arabidopsis thaliana OX%3D3702)
dAg1_00012710	-1.64026	0.0480124	Similar to At4g33300: Probable disease resistance protein At4g33300 (Arabidopsis thaliana OX%3D3702)
dAg1_00013033	-3.03114	0.000121508	Similar to PIX13: Probable serine/threonine-protein kinase PIX13 (Arabidopsis thaliana OX%3D3702)
dAg1_00013084	-6.67288	0.000122171	Protein of unknown function
dAg1_00013128	-2.84608	0.0437034	Protein of unknown function
dAg1_00013378	-2.81667	0.00731935	Similar to B3GALT7: Beta-1%2C3-galactosyltransferase 7 (Arabidopsis thaliana OX%3D3702)
dAg1_00013413	-4.08614	0.0123917	Similar to ASPG2: Protein ASPARTIC PROTEASE IN GUARD CELL 2 (Arabidopsis thaliana OX%3D3702)
dAg1_00013800	-11.1167	0.00640603	Similar to SD11: G-type lectin S-receptor-like serine/threonine-protein kinase SD1-1 (Arabidopsis thaliana OX%3D3702)
dAg1_00013920	-6.94837	2.95221e-08	Similar to LRK10L-2.4: LEAF RUST 10 DISEASE-RESISTANCE LOCUS RECEPTOR-LIKE PROTEIN KINASE-like 2.4 (Arabidopsis thaliana OX%3D3702)
dAg1_00014140	-6.83082	0.00401127	Protein of unknown function
dAg1_00014159	-4.63543	0.00106181	Similar to RLP13: Receptor-like protein 13 (Arabidopsis thaliana OX%3D3702)
dAg1_00014161	-4.14195	0.0361124	Protein of unknown function
dAg1_00014173	-11.4976	0.00909873	Protein of unknown function
dAg1_00014390	-2.89778	0.00181844	Similar to SIRP1: E3 ubiquitin-protein ligase SIRP1 (Oryza sativa subsp. japonica OX%3D39947)
dAg1_00014445	-2.78281	0.00852762	Similar to SVR3: Putative elongation factor TypA-like SVR3%2C chloroplastic (Arabidopsis thaliana OX%3D3702)
dAg1_00014570	-2.96106	0.0415358	Similar to DSC1: Disease resistance-like protein DSC1 (Arabidopsis thaliana OX%3D3702)
dAg1_00014574	-12.5871	1.15219e-05	Similar to At5g66900: Probable disease resistance protein At5g66900 (Arabidopsis thaliana OX%3D3702)
dAg1_00014956	-3.42774	0.0235794	Similar to RPP13: Disease resistance protein RPP13 (Arabidopsis thaliana OX%3D3702)
dAg1_00015143	-7.83144	0.0114956	Similar to ITN1: Ankyrin repeat-containing protein ITN1 (Arabidopsis thaliana OX%3D3702)
dAg1_00015295	-2.40218	0.0407888	Similar to At5g03795: Probable glycosyltransferase At5g03795 (Arabidopsis thaliana OX%3D3702)
dAg1_00015348	-1.77566	0.0417406	Similar to GATA26: GATA transcription factor 26 (Arabidopsis thaliana OX%3D3702)
dAg1_00015797	-8.57773	0.000193911	Similar to WRKY41: Probable WRKY transcription factor 41 (Arabidopsis thaliana OX%3D3702)
dAg1_00015808	-13.0262	3.78469e-08	Similar to B2 protein (Daucus carota OX%3D4039)
dAg1_00015812	-2.04436	0.0285801	Similar to MPC1: Mitochondrial pyruvate carrier 1 (Arabidopsis thaliana OX%3D3702)
dAg1_00015972	-1.77572	0.0206832	Similar to BT3: BTB/POZ and TAZ domain-containing protein 3 (Arabidopsis thaliana OX%3D3702)
dAg1_00015991	-4.15545	0.00668383	Similar to At5g02620: Ankyrin repeat-containing protein At5g02620 (Arabidopsis thaliana OX%3D3702)
dAg1_00016645	-5.34224	0.0386997	Similar to ITN1: Ankyrin repeat-containing protein ITN1 (Arabidopsis thaliana OX%3D3702)
dAg1_00016659	-6.827	1.78193e-06	Similar to WRKY50: Probable WRKY transcription factor 50 (Arabidopsis thaliana OX%3D3702)
dAg1_00016694	-8.18236	1.73358e-06	Similar to IQM1: IQ domain-containing protein IQM1 (Arabidopsis thaliana OX%3D3702)
dAg1_00016753	-2.87228	0.000126994	Similar to At4g32940: Vacuolar-processing enzyme gamma-isozyme (Arabidopsis thaliana OX%3D3702)
dAg1_00016767	-3.41019	3.5056e-05	Similar to At4g32940: Vacuolar-processing enzyme gamma-isozyme (Arabidopsis thaliana OX%3D3702)
dAg1_00016775	-3.44561	0.0029973	Similar to FC1: Ferrochelatase-1%2C chloroplastic/mitochondrial (Arabidopsis thaliana OX%3D3702)
dAg1_00016793	-3.99188	0.00271826	Similar to HSL1: Receptor-like protein kinase HSL1 (Arabidopsis thaliana OX%3D3702)
dAg1_00016806	-2.68588	0.0320243	Similar to CEPR1: Receptor protein-tyrosine kinase CEPR1 (Arabidopsis thaliana OX%3D3702)
dAg1_00016816	-1.87113	0.0163735	Similar to CSE: Caffeoylshikimate esterase (Arabidopsis thaliana OX%3D3702)
dAg1_00016824	-2.0023	0.0499347	Similar to ATHB-15: Homeobox-leucine zipper protein ATHB-15 (Arabidopsis thaliana OX%3D3702)
dAg1_00016855	-5.65134	0.000412932	Similar to At5g02620: Ankyrin repeat-containing protein At5g02620 (Arabidopsis thaliana OX%3D3702)
dAg1_00016900	-5.2862	0.0058139	Similar to Os04g0669500: Probable carboxylesterase Os04g0669500 (Oryza sativa subsp. japonica OX%3D39947)
dAg1_00016998	-2.98766	0.0479374	Similar to RLP6: Receptor-like protein 6 (Arabidopsis thaliana OX%3D3702)
dAg1_00017139	-2.83044	0.0423222	Similar to HIP1: Probable E3 ubiquitin-protein ligase HIP1 (Oryza sativa subsp. japonica OX%3D39947)
dAg1_00017283	-11.7369	0.00371594	Similar to CYP71D10: Cytochrome P450 71D10 (Glycine max OX%3D3847)
dAg1_00017325	-2.30064	0.0251752	Similar to AOX1A: Ubiquinol oxidase 1a%2C mitochondrial (Arabidopsis thaliana OX%3D3702)
dAg1_00017326	-28.538	9.44353e-09	Similar to AOX4: Ubiquinol oxidase 4%2C chloroplastic/chromoplastic (Arabidopsis thaliana OX%3D3702)
dAg1_00017327	-8.26912	0.00029765	Similar to DUR3: Urea-proton symporter DUR3 (Arabidopsis thaliana OX%3D3702)
dAg1_00017371	-11.7478	0.00489694	Similar to DUR3: Urea-proton symporter DUR3 (Arabidopsis thaliana OX%3D3702)
dAg1_00017449	-7.84964	0.0424312	Protein of unknown function
dAg1_00017535	-4.98554	0.00675052	Similar to JMJ706: Lysine-specific demethylase JMJ706 (Oryza sativa subsp. japonica OX%3D39947)
dAg1_00017591	-2.242	0.00179034	Protein of unknown function
dAg1_00017604	-9.14218	0.000250934	Protein of unknown function
dAg1_00017650	-2.36804	0.0267918	Similar to BAM3: Beta-amylase 3%2C chloroplastic (Arabidopsis thaliana OX%3D3702)
dAg1_00017651	-2.15774	0.00427539	Protein of unknown function
dAg1_00017652	-2.19732	0.0251752	Similar to BAM3: Beta-amylase 3%2C chloroplastic (Arabidopsis thaliana OX%3D3702)
dAg1_00017655	-7.32993	1.75695e-07	Similar to PBL19: Probable serine/threonine-protein kinase PBL19 (Arabidopsis thaliana OX%3D3702)
dAg1_00017686	-4.92618	0.022998	Protein of unknown function
dAg1_00017719	-4.33588	0.00716889	Protein of unknown function
dAg1_00017807	-6.89225	0.000163065	Similar to At5g13200: GEM-like protein 5 (Arabidopsis thaliana OX%3D3702)
dAg1_00017840	-2.21169	0.0415164	Protein of unknown function
dAg1_00017905	-3.20275	0.0154603	Similar to At1g62810: Primary amine oxidase (Arabidopsis thaliana OX%3D3702)
dAg1_00017924	-4.15167	0.0104194	Similar to At4g22758: Uncharacterized protein At4g22758 (Arabidopsis thaliana OX%3D3702)
dAg1_00017936	-7.17124	3.48763e-05	Similar to SAP7: Zinc finger A20 and AN1 domain-containing stress-associated protein 7 (Arabidopsis thaliana OX%3D3702)
dAg1_00017961	-1.83267	0.0472186	Similar to SBT1.2: Subtilisin-like protease SBT1.2 (Arabidopsis thaliana OX%3D3702)
dAg1_00017976	-2.16314	0.00232164	Similar to PLDBETA1: Phospholipase D beta 1 (Arabidopsis thaliana OX%3D3702)
dAg1_00018007	-5.77377	0.00243829	Similar to OSM34: Osmotin-like protein OSM34 (Arabidopsis thaliana OX%3D3702)
dAg1_00018008	-5.81721	0.0114956	Protein of unknown function
dAg1_00018068	-2.9688	0.0220669	Similar to At1g76660: Uncharacterized protein At1g76660 (Arabidopsis thaliana OX%3D3702)
dAg1_00018158	-2.36041	0.0461295	Similar to SEH1: Protein SEH1 (Arabidopsis thaliana OX%3D3702)
dAg1_00018159	-10.562	1.22173e-05	Similar to WRKY41: Probable WRKY transcription factor 41 (Arabidopsis thaliana OX%3D3702)
dAg1_00018208	-4.80295	3.80611e-07	Similar to B2 protein (Daucus carota OX%3D4039)
dAg1_00018263	-2.59776	0.0138377	Similar to GRF8: Growth-regulating factor 8 (Arabidopsis thaliana OX%3D3702)
dAg1_00018302	-1.95918	0.0206447	Similar to At1g34300: G-type lectin S-receptor-like serine/threonine-protein kinase At1g34300 (Arabidopsis thaliana OX%3D3702)
dAg1_00018441	-3.50996	0.00242794	Similar to CIPK5: CBL-interacting protein kinase 5 (Oryza sativa subsp. japonica OX%3D39947)
dAg1_00018555	-1.8908	0.0260561	Similar to VPS28-2: Vacuolar protein sorting-associated protein 28 homolog 2 (Arabidopsis thaliana OX%3D3702)
dAg1_00018581	-3.62687	0.0367702	Similar to YSL7: Probable metal-nicotianamine transporter YSL7 (Arabidopsis thaliana OX%3D3702)
dAg1_00018647	-4.66527	0.000230888	Protein of unknown function
dAg1_00018652	-4.23085	6.56782e-05	Similar to CPK16: Calcium-dependent protein kinase 16 (Arabidopsis thaliana OX%3D3702)
dAg1_00018681	-5.16595	0.0343231	Protein of unknown function
dAg1_00018693	-4.07738	0.0144925	Similar to HSR4: Protein HYPER-SENSITIVITY-RELATED 4 (Arabidopsis thaliana OX%3D3702)
dAg1_00018707	-3.11003	0.00128531	Similar to PUB5: U-box domain-containing protein 5 (Arabidopsis thaliana OX%3D3702)
dAg1_00019184	-2.76422	0.00850085	Similar to GK-2: Guanylate kinase 2 (Arabidopsis thaliana OX%3D3702)
dAg1_00019356	-3.45118	0.0127883	Similar to GAT1: GABA transporter 1 (Arabidopsis thaliana OX%3D3702)
dAg1_00019386	-6.13149	3.79564e-06	Similar to LECRK1: G-type lectin S-receptor-like serine/threonine-protein kinase LECRK1 (Oryza sativa subsp. japonica OX%3D39947)
dAg1_00019629	-6.2144	3.38886e-06	Similar to AMC1: Metacaspase-1 (Arabidopsis thaliana OX%3D3702)
dAg1_00019695	-14.9345	1.28662e-05	Similar to ERF5: Ethylene-responsive transcription factor 5 (Arabidopsis thaliana OX%3D3702)
dAg1_00019696	-11.4085	1.2581e-05	Similar to ERF106: Ethylene-responsive transcription factor ERF106 (Arabidopsis thaliana OX%3D3702)
dAg1_00019697	-9.79095	9.82002e-05	Similar to ERF105: Ethylene-responsive transcription factor ERF105 (Arabidopsis thaliana OX%3D3702)
dAg1_00019709	-3.30874	3.50974e-05	Similar to PUB35: U-box domain-containing protein 35 (Arabidopsis thaliana OX%3D3702)
dAg1_00020021	-2.72085	0.00137797	Similar to PAE9: Pectin acetylesterase 9 (Arabidopsis thaliana OX%3D3702)
dAg1_00020035	-2.82015	0.000382348	Similar to PUB32: U-box domain-containing protein 32 (Arabidopsis thaliana OX%3D3702)
dAg1_00020128	-4.31604	0.00488839	Similar to At5g08350: GEM-like protein 4 (Arabidopsis thaliana OX%3D3702)
dAg1_00020197	-3.11378	7.35571e-05	Similar to CALM1: Calmodulin (Solanum lycopersicum OX%3D4081)
dAg1_00020330	-7.63401	0.011372	Similar to CSLD3: Cellulose synthase-like protein D3 (Arabidopsis thaliana OX%3D3702)
dAg1_00020348	-3.41181	0.0029973	Protein of unknown function
dAg1_00020401	-12.4347	0.00198357	Similar to DMR6: Protein DOWNY MILDEW RESISTANCE 6 (Arabidopsis thaliana OX%3D3702)
dAg1_00020427	-9.34293	0.000839316	Similar to CSLD3: Cellulose synthase-like protein D3 (Arabidopsis thaliana OX%3D3702)
dAg1_00020430	-2.27461	0.0314581	Similar to 4CL3: 4-coumarate--CoA ligase 3 (Arabidopsis thaliana OX%3D3702)
dAg1_00020492	-2.66066	0.0128822	Similar to NAC062: NAC domain-containing protein 62 (Arabidopsis thaliana OX%3D3702)
dAg1_00020518	-9.98171	0.000959801	Protein of unknown function
dAg1_00020536	-4.83757	0.0245383	Similar to SAUR32: Auxin-responsive protein SAUR32 (Arabidopsis thaliana OX%3D3702)
dAg1_00020539	-5.84176	0.0206832	Similar to ZAT10: Zinc finger protein ZAT10 (Arabidopsis thaliana OX%3D3702)
dAg1_00020682	-3.07368	0.00181467	Protein of unknown function
dAg1_00020684	-2.93336	0.0291341	Similar to LRK10L-2.5: LEAF RUST 10 DISEASE-RESISTANCE LOCUS RECEPTOR-LIKE PROTEIN KINASE-like 2.5 (Arabidopsis thaliana OX%3D3702)
dAg1_00020757	-2.15311	0.00794905	Similar to HSP90-1: Heat shock protein 90-1 (Arabidopsis thaliana OX%3D3702)
dAg1_00020954	-3.28172	0.00680828	Similar to E4: Peptide methionine sulfoxide reductase (Fragment) (Solanum lycopersicum OX%3D4081)
dAg1_00021020	-2.61346	0.0317315	Protein of unknown function
dAg1_00021113	-1.76232	0.0455684	Similar to HIR1: Hypersensitive-induced response protein 1 (Arabidopsis thaliana OX%3D3702)
dAg1_00021130	-2.52538	0.0102152	Similar to At1g74750: Pentatricopeptide repeat-containing protein At1g74750 (Arabidopsis thaliana OX%3D3702)
dAg1_00021183	-3.66025	0.000679509	Protein of unknown function
dAg1_00021256	-4.8083	0.00108801	Similar to At1g13580: LAG1 longevity assurance homolog 3 (Arabidopsis thaliana OX%3D3702)
dAg1_00021304	-2.68922	0.0359159	Protein of unknown function
dAg1_00021388	-5.73184	1.27753e-06	Similar to At5g10370: ATP-dependent RNA helicase DEAH12%2C chloroplastic (Arabidopsis thaliana OX%3D3702)
dAg1_00021389	-10.2725	0.00142013	Similar to CML45: Probable calcium-binding protein CML45 (Arabidopsis thaliana OX%3D3702)
dAg1_00021398	-1.8791	0.00515579	Similar to SUD1: Probable E3 ubiquitin ligase SUD1 (Arabidopsis thaliana OX%3D3702)
dAg1_00021441	-2.56522	0.0259095	Similar to At1g80180: MAPK kinase substrate protein At1g80180 (Arabidopsis thaliana OX%3D3702)
dAg1_00021483	-14.1538	0.0426181	Similar to WRKY40: Probable WRKY transcription factor 40 (Arabidopsis thaliana OX%3D3702)
dAg1_00021604	-25.195	1.4751e-09	Similar to At4g01020: ATP-dependent RNA helicase DEAH11%2C chloroplastic (Arabidopsis thaliana OX%3D3702)
dAg1_00021617	-3.06791	0.0448862	Similar to RBOHD: Respiratory burst oxidase homolog protein D (Arabidopsis thaliana OX%3D3702)
dAg1_00021633	-4.01495	0.0121308	Similar to RBOHD: Respiratory burst oxidase homolog protein D (Arabidopsis thaliana OX%3D3702)
dAg1_00021734	-7.51859	9.58556e-05	Similar to CML27: Probable calcium-binding protein CML27 (Arabidopsis thaliana OX%3D3702)
dAg1_00021787	-16.7019	1.68431e-08	Protein of unknown function
dAg1_00021829	-19.0279	3.32275e-08	Protein of unknown function
dAg1_00021830	-3.17577	0.0029973	Protein of unknown function
dAg1_00021877	-5.44651	0.0349767	Similar to CES101: G-type lectin S-receptor-like serine/threonine-protein kinase CES101 (Arabidopsis thaliana OX%3D3702)
dAg1_00021899	-4.9187	0.0417096	Similar to Os09g0127800: Coatomer subunit alpha-3 (Oryza sativa subsp. japonica OX%3D39947)
dAg1_00021932	-4.26438	0.00188135	Similar to NPF1.2: Protein NRT1/ PTR FAMILY 1.2 (Arabidopsis thaliana OX%3D3702)
dAg1_00022113	-2.32222	0.000530056	Similar to KAS2: 3-oxoacyl-[acyl-carrier-protein] synthase II%2C chloroplastic (Arabidopsis thaliana OX%3D3702)
dAg1_00022134	-3.88991	0.00196791	Similar to LOX3: Lipoxygenase 3%2C chloroplastic (Arabidopsis thaliana OX%3D3702)
dAg1_00022135	-3.26251	0.00081061	Similar to CYP92C6: Trimethyltridecatetraene synthase (Zea mays OX%3D4577)
dAg1_00022181	-2.59332	0.00821751	Similar to CAX2: Vacuolar cation/proton exchanger 2 (Oryza sativa subsp. japonica OX%3D39947)
dAg1_00022269	-13.4765	3.59948e-06	Similar to At1g61340: F-box protein At1g61340 (Arabidopsis thaliana OX%3D3702)
dAg1_00022282	-2.1647	0.0317315	Similar to CRPK1: Cold-responsive protein kinase 1 (Arabidopsis thaliana OX%3D3702)
dAg1_00022307	-2.02223	0.0142449	Similar to HSC80: Heat shock cognate protein 80 (Solanum lycopersicum OX%3D4081)
dAg1_00022412	-8.95797	0.000163065	Similar to KIC: Calcium-binding protein KIC (Arabidopsis thaliana OX%3D3702)
dAg1_00022529	-2.94905	0.0131136	Similar to DTX18: Protein DETOXIFICATION 18 (Arabidopsis thaliana OX%3D3702)
dAg1_00022636	-2.44793	0.016916	Similar to RPP13: Disease resistance protein RPP13 (Arabidopsis thaliana OX%3D3702)
dAg1_00022727	-7.1622	0.00229898	Protein of unknown function
dAg1_00022800	-21.4089	0.00401127	Similar to WRKY30: Probable WRKY transcription factor 30 (Arabidopsis thaliana OX%3D3702)
dAg1_00022826	-6.70503	1.04347e-05	Similar to UBC28: Ubiquitin-conjugating enzyme E2 28 (Arabidopsis thaliana OX%3D3702)
dAg1_00022861	-3.47515	0.0153261	Protein of unknown function
dAg1_00022937	-3.39084	0.0197666	Similar to MNR1: (+)-neomenthol dehydrogenase (Capsicum annuum OX%3D4072)
dAg1_00023120	-3.1153	9.18334e-07	Similar to DRP1E: Dynamin-related protein 1E (Arabidopsis thaliana OX%3D3702)
dAg1_00023560	-4.94428	0.00129014	Similar to At4g33920: Probable protein phosphatase 2C 63 (Arabidopsis thaliana OX%3D3702)
dAg1_00023690	-3.44015	0.00765132	Similar to ERG1: Elicitor-responsive protein 1 (Oryza sativa subsp. indica OX%3D39946)
dAg1_00023760	-6.92659	0.000840273	Similar to CYP72A15: Cytochrome P450 72A15 (Arabidopsis thaliana OX%3D3702)
dAg1_00023984	-13.0456	1.94534e-21	Similar to NAC022: NAC domain-containing protein 22 (Oryza sativa subsp. japonica OX%3D39947)
dAg1_00024041	-2.03579	0.0324312	Similar to PILS6: Protein PIN-LIKES 6 (Arabidopsis thaliana OX%3D3702)
dAg1_00024164	-2.45748	0.00812644	Similar to AMT2-2: Ammonium transporter 2 member 2 (Oryza sativa subsp. japonica OX%3D39947)
dAg1_00024309	-8.47528	1.24435e-05	Similar to TIF3A1: Eukaryotic translation initiation factor 3 subunit A (Arabidopsis thaliana OX%3D3702)
dAg1_00024324	-5.45411	0.00455063	Similar to HIPP06: Heavy metal-associated isoprenylated plant protein 6 (Arabidopsis thaliana OX%3D3702)
dAg1_00024449	-4.5913	0.00512726	Similar to WRKY70: WRKY DNA-binding transcription factor 70 (Solanum lycopersicum OX%3D4081)
dAg1_00024465	-3.55011	0.00556257	Similar to ELCL: Protein ELC-like (Arabidopsis thaliana OX%3D3702)
dAg1_00024545	-9.61466	3.321e-06	Protein of unknown function
dAg1_00024550	-8.76401	5.36092e-08	Similar to HSP26-A: Probable glutathione S-transferase (Glycine max OX%3D3847)
dAg1_00024569	-3.01378	0.0296607	Similar to LECRKS4: L-type lectin-domain containing receptor kinase S.4 (Arabidopsis thaliana OX%3D3702)
dAg1_00024743	-1.93836	0.026441	Protein of unknown function
dAg1_00024778	-7.79675	0.00247206	Similar to NHL10: NDR1/HIN1-like protein 10 (Arabidopsis thaliana OX%3D3702)
dAg1_00024896	-1.76636	0.0127646	Similar to TGAL10: Transcription factor TGAL10 (Oryza sativa subsp. japonica OX%3D39947)
dAg1_00024978	-11.1784	0.00377303	Similar to GNS1: Glucan endo-1%2C3-beta-glucosidase%2C basic isoform (Prunus persica OX%3D3760)
dAg1_00024998	-7.3033	2.48682e-05	Similar to CISZOG2: Cis-zeatin O-glucosyltransferase 2 (Zea mays OX%3D4577)
dAg1_00025316	-2.66897	0.0255378	Similar to RLP38: Receptor-like protein 38 (Arabidopsis thaliana OX%3D3702)
dAg1_00025325	-2.8321	0.0181383	Similar to MO3: Monooxygenase 3 (Arabidopsis thaliana OX%3D3702)
dAg1_00025511	-4.73193	0.0397728	Similar to GAE1: UDP-glucuronate 4-epimerase 1 (Arabidopsis thaliana OX%3D3702)
dAg1_00025525	-5.70004	0.00366938	Similar to At2g13100: Putative glycerol-3-phosphate transporter 5 (Arabidopsis thaliana OX%3D3702)
dAg1_00025600	-3.50069	4.73398e-07	Similar to RPA1B: Replication protein A 70 kDa DNA-binding subunit B (Oryza sativa subsp. japonica OX%3D39947)
dAg1_00025731	-2.35592	1.02577e-05	Similar to MKK2: Mitogen-activated protein kinase kinase 2 (Arabidopsis thaliana OX%3D3702)
dAg1_00025734	-20.2129	0.0435476	Similar to At3g55350: Protein ALP1-like (Arabidopsis thaliana OX%3D3702)
dAg1_00025788	-2.19593	0.0338877	Similar to HSL1: Receptor-like protein kinase HSL1 (Arabidopsis thaliana OX%3D3702)
dAg1_00025913	-3.3877	0.00215009	Similar to CES101: G-type lectin S-receptor-like serine/threonine-protein kinase CES101 (Arabidopsis thaliana OX%3D3702)
dAg1_00026139	-2.45909	0.0226698	Similar to At4g27190: Disease resistance protein At4g27190 (Arabidopsis thaliana OX%3D3702)
dAg1_00026140	-2.55057	0.000184142	Protein of unknown function
dAg1_00026170	-11.7446	1.57196e-05	Similar to ERF9: Ethylene-responsive transcription factor 9 (Arabidopsis thaliana OX%3D3702)
dAg1_00026218	-6.91257	0.000839316	Similar to CIGR1: Chitin-inducible gibberellin-responsive protein 1 (Oryza sativa subsp. japonica OX%3D39947)
dAg1_00026728	-4.7729	0.0307729	Similar to TUFA: Elongation factor Tu%2C chloroplastic (Arabidopsis thaliana OX%3D3702)
dAg1_00027240	-2.79682	0.00926574	Similar to LRK10L-1.2: LEAF RUST 10 DISEASE-RESISTANCE LOCUS RECEPTOR-LIKE PROTEIN KINASE-like 1.2 (Arabidopsis thaliana OX%3D3702)
dAg1_00027270	-2.02574	0.0373837	Protein of unknown function
dAg1_00027487	-3.21101	0.000132823	Similar to PP2B10: F-box protein PP2-B10 (Arabidopsis thaliana OX%3D3702)
dAg1_00027489	-4.46204	1.494e-05	Similar to At5g06060: Tropinone reductase homolog At5g06060 (Arabidopsis thaliana OX%3D3702)
dAg1_00027498	-7.00171	0.0291341	Similar to PP2B10: F-box protein PP2-B10 (Arabidopsis thaliana OX%3D3702)
dAg1_00027505	-5.15509	6.2062e-05	Similar to At5g06060: Tropinone reductase homolog At5g06060 (Arabidopsis thaliana OX%3D3702)
dAg1_00027762	-2.90805	0.0203592	Similar to SULTR1%3B3: Sulfate transporter 1.3 (Arabidopsis thaliana OX%3D3702)
dAg1_00027812	-2.21125	0.0142449	Similar to SAPK1: Serine/threonine-protein kinase SAPK1 (Oryza sativa subsp. japonica OX%3D39947)
dAg1_00027858	-2.57588	0.0267722	Similar to WAKL20: Wall-associated receptor kinase-like 20 (Arabidopsis thaliana OX%3D3702)
dAg1_00027892	-25.7269	5.73406e-06	Similar to AZF2: Zinc finger protein AZF2 (Arabidopsis thaliana OX%3D3702)
dAg1_00028106	-3.30082	0.000161034	Similar to RPP8L3: Disease resistance RPP8-like protein 3 (Arabidopsis thaliana OX%3D3702)
dAg1_00028111	-3.23019	0.000138561	Protein of unknown function
dAg1_00028194	-7.65784	7.01848e-06	Similar to WRKY11: Probable WRKY transcription factor 11 (Arabidopsis thaliana OX%3D3702)
dAg1_00028218	-2.55774	0.0451453	Similar to PARG1: Poly(ADP-ribose) glycohydrolase 1 (Arabidopsis thaliana OX%3D3702)
dAg1_00028464	-2.85772	0.0437189	Protein of unknown function
dAg1_00028516	-5.57532	0.00440326	Similar to RLP6: Receptor-like protein 6 (Arabidopsis thaliana OX%3D3702)
dAg1_00028517	-3.33252	0.00455063	Similar to KINB1: SNF1-related protein kinase regulatory subunit beta-1 (Arabidopsis thaliana OX%3D3702)
dAg1_00028586	-5.85545	1.73358e-06	Similar to RLP6: Receptor-like protein 6 (Arabidopsis thaliana OX%3D3702)
dAg1_00028589	-4.5345	0.000483066	Similar to RLP7: Receptor-like protein 7 (Arabidopsis thaliana OX%3D3702)
dAg1_00028658	-19.2026	7.87707e-08	Protein of unknown function
dAg1_00028660	-6.4573	1.4025e-05	Similar to RPP8L4: Probable disease resistance RPP8-like protein 4 (Arabidopsis thaliana OX%3D3702)
dAg1_00028792	-4.219	0.0393914	Protein of unknown function
dAg1_00028846	-2.46788	0.0340419	Similar to ALA9: Putative phospholipid-transporting ATPase 9 (Arabidopsis thaliana OX%3D3702)
dAg1_00028855	-13.6008	0.0129104	Protein of unknown function
dAg1_00028857	-8.6714	0.0234357	Protein of unknown function
dAg1_00028882	-3.66055	0.00893218	Similar to RAV1: AP2/ERF and B3 domain-containing transcription factor RAV1 (Arabidopsis thaliana OX%3D3702)
dAg1_00028917	-8.84645	6.50092e-11	Protein of unknown function
dAg1_00028996	-5.89759	0.00136026	Similar to At1g53420: Probable LRR receptor-like serine/threonine-protein kinase At1g53420 (Arabidopsis thaliana OX%3D3702)
dAg1_00029245	-3.84211	0.0197666	Similar to At3g28580: AAA-ATPase At3g28580 (Arabidopsis thaliana OX%3D3702)
dAg1_00029256	-3.25413	0.000355636	Similar to At3g28510: AAA-ATPase At3g28510 (Arabidopsis thaliana OX%3D3702)
dAg1_00029323	-3.6955	9.81608e-05	Similar to PBL3: Probable serine/threonine-protein kinase PBL3 (Arabidopsis thaliana OX%3D3702)
dAg1_00029359	-1.83013	0.0232341	Protein of unknown function
dAg1_00029376	-2.73321	0.0222557	Protein of unknown function
dAg1_00029434	-3.51663	0.028498	Protein of unknown function
dAg1_00029651	-3.15262	0.0461295	Protein of unknown function
dAg1_00029748	-5.09722	0.043112	Similar to AGL103: Agamous-like MADS-box protein AGL103 (Arabidopsis thaliana OX%3D3702)
dAg1_00029857	-1.98821	0.00515579	Similar to RPA1D: Replication protein A 70 kDa DNA-binding subunit D (Arabidopsis thaliana OX%3D3702)
dAg1_00029876	-3.23847	0.00085537	Similar to DSPTP1B: Dual specificity protein phosphatase 1B (Arabidopsis thaliana OX%3D3702)
dAg1_00030056	-4.83712	0.00320649	Similar to TGA1: Teosinte glume architecture 1 (Zea mays OX%3D4577)
dAg1_00030188	-2.46933	0.0330883	Similar to PATROL1: Protein unc-13 homolog (Arabidopsis thaliana OX%3D3702)
dAg1_00030492	-5.05743	0.00372484	Protein of unknown function
dAg1_00030783	-3.66398	0.0015895	Similar to At5g47530: Cytochrome b561 and DOMON domain-containing protein At5g47530 (Arabidopsis thaliana OX%3D3702)
dAg1_00030980	-1.93474	0.0393914	Similar to NADP-ME3: NADP-dependent malic enzyme 3 (Arabidopsis thaliana OX%3D3702)
dAg1_00030981	-4.70565	0.0182312	Similar to CHIB1: Acidic endochitinase (Arabidopsis thaliana OX%3D3702)
dAg1_00031014	-7.57237	1.76358e-19	Similar to CNGC1: Cyclic nucleotide-gated ion channel 1 (Arabidopsis thaliana OX%3D3702)
dAg1_00031082	-5.82218	0.000679509	Protein of unknown function
dAg1_00031171	-5.32844	0.00737959	Protein of unknown function
dAg1_00031175	-2.59205	0.0363104	Similar to PHB3: Prohibitin-3%2C mitochondrial (Arabidopsis thaliana OX%3D3702)
dAg1_00031305	-3.52054	0.0162824	Similar to CIGR2: Chitin-inducible gibberellin-responsive protein 2 (Oryza sativa subsp. japonica OX%3D39947)
dAg1_00031376	-5.04128	0.022998	Similar to At1g07160: Probable protein phosphatase 2C 2 (Arabidopsis thaliana OX%3D3702)
dAg1_00031381	-4.92697	0.00716889	Similar to At2g40140: Zinc finger CCCH domain-containing protein 29 (Arabidopsis thaliana OX%3D3702)
dAg1_00031500	-5.26016	0.0191251	Similar to ABCG5: ABC transporter G family member 5 (Arabidopsis thaliana OX%3D3702)
dAg1_00031606	-7.30769	1.68431e-08	Similar to CIGR2: Chitin-inducible gibberellin-responsive protein 2 (Oryza sativa subsp. japonica OX%3D39947)
dAg1_00031607	-6.53906	6.59679e-07	Protein of unknown function
dAg1_00031699	-1.8811	0.0407888	Similar to ALIS1: ALA-interacting subunit 1 (Arabidopsis thaliana OX%3D3702)
dAg1_00031701	-2.29785	7.60977e-06	Similar to EXO70H1: Exocyst complex component EXO70H1 (Arabidopsis thaliana OX%3D3702)
dAg1_00031835	-2.00661	0.021118	Similar to ARF11: Auxin response factor 11 (Arabidopsis thaliana OX%3D3702)
dAg1_00031839	-5.97698	0.00174073	Protein of unknown function
dAg1_00031914	-5.43434	5.54193e-07	Similar to ASP1: Aspartic proteinase Asp1 (Oryza sativa subsp. japonica OX%3D39947)
dAg1_00032244	-15.3059	0.000196127	Similar to At2g30020: Probable protein phosphatase 2C 25 (Arabidopsis thaliana OX%3D3702)
dAg1_00032316	-6.88843	0.0340419	Protein of unknown function
dAg1_00032498	-6.13985	0.000239803	Similar to MPK3: Mitogen-activated protein kinase 3 (Arabidopsis thaliana OX%3D3702)
dAg1_00033001	-2.99944	5.16349e-05	Similar to MDIS2: Protein MALE DISCOVERER 2 (Arabidopsis thaliana OX%3D3702)
dAg1_00033340	-3.06406	0.00498555	Similar to SGT1B: Protein SGT1 homolog B (Arabidopsis thaliana OX%3D3702)
dAg1_00033345	-8.81593	1.31508e-07	Similar to HIPP12: Heavy metal-associated isoprenylated plant protein 12 (Arabidopsis thaliana OX%3D3702)
dAg1_00033453	-2.34989	0.031967	Similar to Os03g0268000: Serine/threonine-protein phosphatase PP1 (Oryza sativa subsp. japonica OX%3D39947)
dAg1_00033726	-4.57806	0.0146288	Protein of unknown function
dAg1_00033728	-4.04865	0.0125451	Similar to PK1: Putative receptor protein kinase ZmPK1 (Zea mays OX%3D4577)
dAg1_00033752	-5.65456	0.0142449	Similar to ATG1A: Serine/threonine-protein kinase ATG1a (Arabidopsis thaliana OX%3D3702)
dAg1_00033822	-5.5165	0.00367744	Similar to WRKY24: WRKY transcription factor WRKY24 (Oryza sativa subsp. japonica OX%3D39947)
dAg1_00034131	-3.2236	0.000579449	Protein of unknown function
dAg1_00034157	-14.9096	7.60977e-06	Similar to RIPK: Serine/threonine-protein kinase RIPK (Arabidopsis thaliana OX%3D3702)
dAg1_00034325	-3.7327	0.0176936	Similar to WRKY40: Probable WRKY transcription factor 40 (Arabidopsis thaliana OX%3D3702)
dAg1_00034395	-2.48228	0.000848425	Similar to APCB1: Aspartyl protease APCB1 (Arabidopsis thaliana OX%3D3702)
dAg1_00034490	-1.77489	0.0330883	Similar to HIR1: Hypersensitive-induced response protein 1 (Arabidopsis thaliana OX%3D3702)
dAg1_00034504	-2.36697	0.041559	Similar to GALT6: Hydroxyproline O-galactosyltransferase GALT6 (Arabidopsis thaliana OX%3D3702)
dAg1_00034512	-3.94227	0.00510516	Similar to EDS1B: Protein EDS1B (Arabidopsis thaliana OX%3D3702)
dAg1_00034513	-4.88971	7.19099e-09	Similar to EDS1: Protein EDS1 (Arabidopsis thaliana OX%3D3702)
dAg1_00034514	-4.36684	2.1612e-18	Similar to ALDH10A8: Betaine aldehyde dehydrogenase 1%2C chloroplastic (Arabidopsis thaliana OX%3D3702)
dAg1_00034643	-5.38226	0.00137797	Protein of unknown function
dAg1_00034696	-9.83317	3.9217e-07	Similar to NAC062: NAC domain-containing protein 62 (Arabidopsis thaliana OX%3D3702)
dAg1_00034848	-2.61522	0.0455684	Similar to KIPK1: Serine/threonine-protein kinase KIPK1 (Arabidopsis thaliana OX%3D3702)
dAg1_00034897	-2.53292	0.0267808	Similar to LOG3: Cytokinin riboside 5'-monophosphate phosphoribohydrolase LOG3 (Arabidopsis thaliana OX%3D3702)
dAg1_00034938	-6.28684	0.0181383	Similar to ZAT11: Zinc finger protein ZAT11 (Arabidopsis thaliana OX%3D3702)
dAg1_00034954	-4.87619	0.00200396	Similar to HSP70-1: Heat shock 70 kDa protein 1 (Arabidopsis thaliana OX%3D3702)
dAg1_00035045	-1.81214	0.0121114	Similar to At5g58620: Zinc finger CCCH domain-containing protein 66 (Arabidopsis thaliana OX%3D3702)
dAg1_00035139	-3.73264	0.0123146	Similar to TET3: Tetraspanin-3 (Arabidopsis thaliana OX%3D3702)
dAg1_00035213	-3.02457	5.0893e-05	Similar to RIN4: RPM1-interacting protein 4 (Arabidopsis thaliana OX%3D3702)
dAg1_00035501	-4.68069	0.00198831	Similar to CIGR2: Chitin-inducible gibberellin-responsive protein 2 (Oryza sativa subsp. japonica OX%3D39947)
dAg1_00035532	-2.40854	0.00112062	Similar to At5g55860: WEB family protein At5g55860 (Arabidopsis thaliana OX%3D3702)
dAg1_00035618	-4.50235	0.000395933	Similar to PUMP6: Mitochondrial uncoupling protein 6 (Arabidopsis thaliana OX%3D3702)
dAg1_00035619	-4.43981	0.0322383	Similar to PUMP5: Mitochondrial uncoupling protein 5 (Arabidopsis thaliana OX%3D3702)
dAg1_00035637	-4.42208	6.27034e-05	Similar to ATL54: RING-H2 finger protein ATL54 (Arabidopsis thaliana OX%3D3702)
dAg1_00035645	-15.7	0.000128189	Protein of unknown function
dAg1_00035979	-3.18635	0.0171066	Similar to At1g61440: G-type lectin S-receptor-like serine/threonine-protein kinase At1g61440 (Arabidopsis thaliana OX%3D3702)
dAg1_00036128	-3.41077	0.00112062	Protein of unknown function
dAg1_00036313	-3.07534	0.000368952	Similar to MAPKKK3: Mitogen-activated protein kinase kinase kinase 3 (Arabidopsis thaliana OX%3D3702)
dAg1_00036375	-3.71663	0.0016052	Similar to At1g48400: F-box/LRR-repeat protein At1g48400 (Arabidopsis thaliana OX%3D3702)
dAg1_00036377	-6.79673	0.000239803	Similar to At4g27290: G-type lectin S-receptor-like serine/threonine-protein kinase At4g27290 (Arabidopsis thaliana OX%3D3702)
dAg1_00036381	-8.80305	0.00012909	Protein of unknown function
dAg1_00036383	-5.81795	0.00365429	Similar to At1g61420: G-type lectin S-receptor-like serine/threonine-protein kinase At1g61420 (Arabidopsis thaliana OX%3D3702)
dAg1_00036384	-7.50554	5.10097e-07	Similar to LECRK2: G-type lectin S-receptor-like serine/threonine-protein kinase LECRK2 (Oryza sativa subsp. indica OX%3D39946)
dAg1_00036515	-4.73606	0.00620484	Similar to HSL1: Receptor-like protein kinase HSL1 (Arabidopsis thaliana OX%3D3702)
dAg1_00036516	-4.24307	1.84054e-05	Similar to PXC3: Leucine-rich repeat receptor-like tyrosine-protein kinase PXC3 (Arabidopsis thaliana OX%3D3702)
dAg1_00036542	-1.76521	0.049753	Similar to SUC1: Sucrose transport protein SUC1 (Arabidopsis thaliana OX%3D3702)
dAg1_00036559	-2.17942	0.0125734	Similar to SUC2: Sucrose transport protein SUC2 (Arabidopsis thaliana OX%3D3702)
dAg1_00036595	-2.2059	0.00366938	Similar to TAO1: Disease resistance protein TAO1 (Arabidopsis thaliana OX%3D3702)
dAg1_00036655	-2.08509	0.0374694	Similar to At1g09580: Transmembrane emp24 domain-containing protein p24delta3 (Arabidopsis thaliana OX%3D3702)
dAg1_00037919	-5.79819	0.000518521	Similar to At2g27500: Glucan endo-1%2C3-beta-glucosidase 14 (Arabidopsis thaliana OX%3D3702)
dAg1_00038404	-3.25591	4.39407e-05	Similar to CRK18: Cysteine-rich receptor-like protein kinase 18 (Arabidopsis thaliana OX%3D3702)
dAg1_00038432	-3.20927	0.00570374	Similar to At2g24240: BTB/POZ domain-containing protein At2g24240 (Arabidopsis thaliana OX%3D3702)
dAg1_00038525	-3.41939	0.0095683	Similar to TET8: Tetraspanin-8 (Arabidopsis thaliana OX%3D3702)
dAg1_00038552	-8.54273	0.00458082	Similar to At5g48380: Probably inactive leucine-rich repeat receptor-like protein kinase At5g48380 (Arabidopsis thaliana OX%3D3702)
dAg1_00038657	-4.56436	0.00620484	Protein of unknown function
dAg1_00038696	-2.41304	0.0475769	Similar to TYRAAT2: Arogenate dehydrogenase 2%2C chloroplastic (Arabidopsis thaliana OX%3D3702)
dAg1_00038703	-3.47809	0.0171066	Protein of unknown function
dAg1_00038783	-6.91987	2.93413e-05	Protein of unknown function
dAg1_00038784	-4.94543	0.0334668	Protein of unknown function
dAg1_00038785	-1.71665	0.0424996	Similar to At1g32860: Glucan endo-1%2C3-beta-glucosidase 11 (Arabidopsis thaliana OX%3D3702)
dAg1_00038837	-8.80887	0.00524237	Similar to ZAT10: Zinc finger protein ZAT10 (Arabidopsis thaliana OX%3D3702)
dAg1_00039440	-2.70461	0.00366938	Protein of unknown function
dAg1_00039723	-4.19113	0.000281924	Similar to TIFY10A: Protein TIFY 10A (Arabidopsis thaliana OX%3D3702)
dAg1_00039805	-2.75267	0.000287705	Protein of unknown function
dAg1_00039809	-4.63223	0.0420378	Similar to UGT71B2: UDP-glycosyltransferase 71B2 (Arabidopsis thaliana OX%3D3702)
dAg1_00039915	-1.72606	0.034707	Similar to NPR3: Regulatory protein NPR3 (Arabidopsis thaliana OX%3D3702)
dAg1_00039935	-2.54744	0.00460941	Similar to PFK3: ATP-dependent 6-phosphofructokinase 3 (Arabidopsis thaliana OX%3D3702)
dAg1_00040055	-2.38021	3.99317e-05	Similar to SDR3c: Short-chain dehydrogenase reductase 3c (Arabidopsis thaliana OX%3D3702)
dAg1_00040099	-2.28811	0.0220544	Similar to KIN12: SNF1-related protein kinase catalytic subunit alpha KIN12 (Arabidopsis thaliana OX%3D3702)
dAg1_00040136	-6.60395	0.00120565	Similar to ACO1: 1-aminocyclopropane-1-carboxylate oxidase 1 (Solanum lycopersicum OX%3D4081)
dAg1_00040139	-4.34214	0.0123917	Similar to ACO4: 1-aminocyclopropane-1-carboxylate oxidase 4 (Solanum lycopersicum OX%3D4081)
dAg1_00040316	-9.28272	0.000958632	Similar to At4g03230: G-type lectin S-receptor-like serine/threonine-protein kinase At4g03230 (Arabidopsis thaliana OX%3D3702)
dAg1_00040329	-2.32562	0.000566978	Similar to At2g19130: G-type lectin S-receptor-like serine/threonine-protein kinase At2g19130 (Arabidopsis thaliana OX%3D3702)
dAg1_00040495	-1.79777	0.0309897	Similar to UBC26: Probable ubiquitin-conjugating enzyme E2 26 (Arabidopsis thaliana OX%3D3702)
dAg1_00040607	-5.75126	1.34483e-07	Similar to SD25: G-type lectin S-receptor-like serine/threonine-protein kinase SD2-5 (Arabidopsis thaliana OX%3D3702)
dAg1_00040643	-4.67218	0.00387331	Similar to At1g34300: G-type lectin S-receptor-like serine/threonine-protein kinase At1g34300 (Arabidopsis thaliana OX%3D3702)
dAg1_00040646	-6.35771	7.52324e-05	Similar to HSFA4B: Heat stress transcription factor A-4b (Oryza sativa subsp. japonica OX%3D39947)
dAg1_00040676	-4.21817	0.0146286	Similar to GPAT1: Glycerol-3-phosphate acyltransferase 1 (Arabidopsis thaliana OX%3D3702)
dAg1_00040690	-20.4081	6.50092e-11	Similar to HIPP16: Heavy metal-associated isoprenylated plant protein 16 (Arabidopsis thaliana OX%3D3702)
dAg1_00040705	-55.699	2.29696e-07	Similar to HIPP16: Heavy metal-associated isoprenylated plant protein 16 (Arabidopsis thaliana OX%3D3702)
dAg1_00040985	-2.04435	0.0163172	Similar to SD18: Receptor-like serine/threonine-protein kinase SD1-8 (Arabidopsis thaliana OX%3D3702)
dAg1_00041127	-8.0119	0.000101513	Similar to Pirin-like protein (Solanum lycopersicum OX%3D4081)
dAg1_00041318	-1.89106	0.0263777	Similar to At1g56130: Probable LRR receptor-like serine/threonine-protein kinase At1g56130 (Arabidopsis thaliana OX%3D3702)
dAg1_00041513	-11.1098	1.4025e-05	Similar to OsI_16820: Salt tolerance receptor-like cytoplasmic kinase 1 (Oryza sativa subsp. indica OX%3D39946)
dAg1_00041796	-3.20081	0.0068568	Similar to ZIP5: Zinc transporter 5 (Oryza sativa subsp. japonica OX%3D39947)
dAg1_00041859	-2.02928	0.00214677	Similar to PAD4: Lipase-like PAD4 (Arabidopsis thaliana OX%3D3702)
dAg1_00041981	-6.50756	0.0373032	Similar to CEY00_Acc04863: Endochitinase (Actinidia chinensis var. chinensis OX%3D1590841)
dAg1_00042116	-3.09405	0.000512234	Similar to At5g03970: F-box protein At5g03970 (Arabidopsis thaliana OX%3D3702)
dAg1_00042245	-8.9366	5.07301e-06	Similar to ACA2: Calcium-transporting ATPase 2%2C plasma membrane-type (Arabidopsis thaliana OX%3D3702)
dAg1_00042519	-5.39436	0.00123575	Similar to SAG101: Senescence-associated carboxylesterase 101 (Arabidopsis thaliana OX%3D3702)
dAg1_00042585	-2.94173	0.038442	Similar to UGT87A2: UDP-glycosyltransferase 87A2 (Arabidopsis thaliana OX%3D3702)
dAg1_00042635	-5.34779	0.029121	Similar to ITN1: Ankyrin repeat-containing protein ITN1 (Arabidopsis thaliana OX%3D3702)
dAg1_00042651	-3.02859	0.00208576	Similar to FLS2: LRR receptor-like serine/threonine-protein kinase FLS2 (Arabidopsis thaliana OX%3D3702)
dAg1_00042700	-7.2471	0.0332102	Similar to CAD6: Probable cinnamyl alcohol dehydrogenase 6 (Oryza sativa subsp. japonica OX%3D39947)
dAg1_00042704	-3.19402	0.00464184	Protein of unknown function
dAg1_00042705	-2.60443	0.00431287	Similar to AGO2: Protein argonaute 2 (Arabidopsis thaliana OX%3D3702)
dAg1_00042749	-2.12627	0.0263777	Similar to MUR4: UDP-arabinose 4-epimerase 1 (Arabidopsis thaliana OX%3D3702)
dAg1_00042761	-1.91443	0.0425099	Similar to CCX4: Cation/calcium exchanger 4 (Arabidopsis thaliana OX%3D3702)
dAg1_00042823	-2.6519	0.00387331	Similar to CAT5: Cationic amino acid transporter 5 (Arabidopsis thaliana OX%3D3702)
dAg1_00042833	-2.05485	0.0237644	Similar to RPM1: Disease resistance protein RPM1 (Arabidopsis thaliana OX%3D3702)
dAg1_00042902	-4.59801	0.0148402	Similar to FLS2: LRR receptor-like serine/threonine-protein kinase FLS2 (Arabidopsis thaliana OX%3D3702)
dAg1_00042918	-2.14098	0.0219698	Similar to PUP3: Purine permease 3 (Arabidopsis thaliana OX%3D3702)
dAg1_00042961	-5.32431	0.022643	Protein of unknown function
dAg1_00043113	-11.3025	0.00149302	Similar to RD19A: Cysteine protease RD19A (Arabidopsis thaliana OX%3D3702)
dAg1_00043118	-7.23251	1.04347e-05	Similar to CATHB2: Cathepsin B-like protease 2 (Arabidopsis thaliana OX%3D3702)
dAg1_00043119	-1.83851	0.0197666	Similar to TBL37: Protein trichome birefringence-like 37 (Arabidopsis thaliana OX%3D3702)
dAg1_00043165	-2.85354	0.0347508	Protein of unknown function
dAg1_00043167	-7.84809	0.00431287	Similar to ROMT: Trans-resveratrol di-O-methyltransferase (Vitis vinifera OX%3D29760)
dAg1_00043245	-1.98512	0.0456797	Similar to ALN: Allantoinase (Arabidopsis thaliana OX%3D3702)
dAg1_00043328	-3.1171	0.00449603	Similar to CBP60B: Calmodulin-binding protein 60 B (Arabidopsis thaliana OX%3D3702)
dAg1_00043396	-3.51972	0.0121963	Similar to B120: G-type lectin S-receptor-like serine/threonine-protein kinase B120 (Arabidopsis thaliana OX%3D3702)
dAg1_00043397	-4.20475	1.75549e-09	Similar to SD18: Receptor-like serine/threonine-protein kinase SD1-8 (Arabidopsis thaliana OX%3D3702)
dAg1_00043403	-4.73145	0.0209619	Similar to At4g27290: G-type lectin S-receptor-like serine/threonine-protein kinase At4g27290 (Arabidopsis thaliana OX%3D3702)
dAg1_00043535	-7.85795	4.57252e-07	Similar to At4g00960: Putative receptor-like protein kinase At4g00960 (Arabidopsis thaliana OX%3D3702)
dAg1_00043537	-5.34298	0.0128822	Similar to SD18: Receptor-like serine/threonine-protein kinase SD1-8 (Arabidopsis thaliana OX%3D3702)
dAg1_00043538	-4.82516	0.000614705	Similar to CRK26: Cysteine-rich receptor-like protein kinase 26 (Arabidopsis thaliana OX%3D3702)
dAg1_00043579	-3.7775	0.0385883	Similar to AAE20: Benzoate--CoA ligase%2C peroxisomal (Arabidopsis thaliana OX%3D3702)
dAg1_00043591	-4.55142	0.000128189	Similar to LRK10L-2.4: LEAF RUST 10 DISEASE-RESISTANCE LOCUS RECEPTOR-LIKE PROTEIN KINASE-like 2.4 (Arabidopsis thaliana OX%3D3702)
dAg1_00043598	-2.70486	0.000217423	Protein of unknown function
dAg1_00043601	-8.33999	3.19829e-13	Similar to CRK10: Cysteine-rich receptor-like protein kinase 10 (Arabidopsis thaliana OX%3D3702)
dAg1_00043603	-4.73573	3.09742e-05	Similar to CCR2: Serine/threonine-protein kinase-like protein CCR2 (Arabidopsis thaliana OX%3D3702)
dAg1_00043651	-1.95826	0.0145352	Similar to VSR6: Vacuolar-sorting receptor 6 (Arabidopsis thaliana OX%3D3702)
dAg1_00043747	-7.32904	0.00106538	Similar to At2g17570: Dehydrodolichyl diphosphate synthase 6 (Arabidopsis thaliana OX%3D3702)
dAg1_00043807	-3.12036	5.86287e-05	Similar to APF1: Aspartyl protease family protein 1 (Arabidopsis thaliana OX%3D3702)
dAg1_00043822	-3.88017	2.39438e-07	Similar to APF1: Aspartyl protease family protein 1 (Arabidopsis thaliana OX%3D3702)
dAg1_00043954	-3.45912	0.00458082	Similar to RPP13L4: Disease resistance RPP13-like protein 4 (Arabidopsis thaliana OX%3D3702)
dAg1_00043961	-2.27236	0.0499347	Protein of unknown function
dAg1_00043991	-2.47828	0.0458478	Protein of unknown function
dAg1_00044085	-10.5098	2.79012e-07	Similar to LRK10L-2.1: LEAF RUST 10 DISEASE-RESISTANCE LOCUS RECEPTOR-LIKE PROTEIN KINASE-like 2.1 (Arabidopsis thaliana OX%3D3702)
dAg1_00044095	-5.33719	3.61617e-06	Similar to LRK10L-1.3: LEAF RUST 10 DISEASE-RESISTANCE LOCUS RECEPTOR-LIKE PROTEIN KINASE-like 1.3 (Arabidopsis thaliana OX%3D3702)
dAg1_00044268	-2.89542	2.14698e-06	Similar to At4g33920: Probable protein phosphatase 2C 63 (Arabidopsis thaliana OX%3D3702)
dAg1_00044421	-3.93077	2.14698e-06	Similar to At5g66900: Probable disease resistance protein At5g66900 (Arabidopsis thaliana OX%3D3702)
dAg1_00044425	-11.3981	1.27753e-06	Similar to DAR5: Protein DA1-related 5 (Arabidopsis thaliana OX%3D3702)
dAg1_00044428	-2.85939	0.0188495	Protein of unknown function
dAg1_00044429	-3.07683	0.00260173	Similar to At5g66890: Probable disease resistance protein At5g66890 (Arabidopsis thaliana OX%3D3702)
dAg1_00044433	-3.25835	0.00377303	Protein of unknown function
dAg1_00044434	-3.92974	0.000253639	Similar to At5g66900: Probable disease resistance protein At5g66900 (Arabidopsis thaliana OX%3D3702)
dAg1_00044475	-5.86091	0.00258316	Similar to LYK4: LysM domain receptor-like kinase 4 (Arabidopsis thaliana OX%3D3702)
dAg1_00044490	-4.25839	0.00077157	Protein of unknown function
dAg1_00044501	-7.25825	4.36488e-05	Protein of unknown function
dAg1_00044502	-8.7887	7.35571e-05	Similar to POX2: Proline dehydrogenase 2%2C mitochondrial (Arabidopsis thaliana OX%3D3702)
dAg1_00044537	-2.07522	0.00371594	Similar to CRLK2: Calcium/calmodulin-regulated receptor-like kinase 2 (Arabidopsis thaliana OX%3D3702)
dAg1_00044650	-2.53196	0.0292357	Protein of unknown function
dAg1_00044691	-2.79284	0.000959801	Protein of unknown function
dAg1_00044708	-2.03107	0.0404267	Protein of unknown function
dAg1_00044857	-3.05346	0.026441	Similar to Os08g0121900: Glycosyltransferase family 92 protein Os08g0121900 (Oryza sativa subsp. japonica OX%3D39947)
dAg1_00044868	-2.79751	2.59897e-05	Similar to LHT1: Lysine histidine transporter 1 (Arabidopsis thaliana OX%3D3702)
dAg1_00000290	1.97666	0.0120488	Similar to PAP12: Probable plastid-lipid-associated protein 12%2C chloroplastic (Arabidopsis thaliana OX%3D3702)
dAg1_00000367	2.045	0.0480325	Similar to IRKI: IRK-interacting protein (Arabidopsis thaliana OX%3D3702)
dAg1_00000423	1.87786	0.00512718	Similar to TMK3: Receptor-like kinase TMK3 (Arabidopsis thaliana OX%3D3702)
dAg1_00000460	2.81022	0.000548921	Similar to OFP13: Transcription repressor OFP13 (Arabidopsis thaliana OX%3D3702)
dAg1_00000659	2.24856	0.0305257	Protein of unknown function
dAg1_00002270	2.67461	0.0171901	Similar to At3g05640: Probable protein phosphatase 2C 34 (Arabidopsis thaliana OX%3D3702)
dAg1_00002401	1.78313	0.0479668	Similar to LIN: Putative E3 ubiquitin-protein ligase LIN (Medicago truncatula OX%3D3880)
dAg1_00002451	2.95598	0.018891	Protein of unknown function
dAg1_00002763	5.50893	0.00351846	Similar to PME53: Probable pectinesterase 53 (Arabidopsis thaliana OX%3D3702)
dAg1_00002880	3.45948	0.00862238	Similar to IQD14: Protein IQ-DOMAIN 14 (Arabidopsis thaliana OX%3D3702)
dAg1_00003025	17.3776	0.0284309	Protein of unknown function
dAg1_00003050	5.05473	0.0269894	Protein of unknown function
dAg1_00003104	1.60862	0.034707	Protein of unknown function
dAg1_00003194	15.3496	0.000272345	Protein of unknown function
dAg1_00003248	2.33169	0.0412446	Similar to CYCU4-1: Cyclin-U4-1 (Arabidopsis thaliana OX%3D3702)
dAg1_00003319	2.42029	0.0012769	Similar to ATHB-4: Homeobox-leucine zipper protein ATHB-4 (Arabidopsis thaliana OX%3D3702)
dAg1_00003391	4.48055	0.0337051	Similar to BAK1: LRR receptor kinase BAK1 (Oryza sativa subsp. japonica OX%3D39947)
dAg1_00003639	2.31489	0.0371232	Protein of unknown function
dAg1_00003663	3.89711	0.0218642	Protein of unknown function
dAg1_00003815	1.88096	0.0208648	Similar to NPF6.2: Protein NRT1/ PTR FAMILY 6.2 (Arabidopsis thaliana OX%3D3702)
dAg1_00004057	7.30215	0.00515579	Similar to PBL7: Probable serine/threonine-protein kinase PBL7 (Arabidopsis thaliana OX%3D3702)
dAg1_00004066	2.5301	0.0334668	Similar to CPT1: Coleoptile phototropism protein 1 (Oryza sativa subsp. japonica OX%3D39947)
dAg1_00004105	4.22255	0.00231924	Similar to At1g09390: GDSL esterase/lipase At1g09390 (Arabidopsis thaliana OX%3D3702)
dAg1_00004135	8.52038	0.000206589	Similar to XTH1: Probable xyloglucan endotransglucosylase/hydrolase 1 (Solanum lycopersicum OX%3D4081)
dAg1_00004262	3.80029	1.51339e-06	Similar to At1g70260: WAT1-related protein At1g70260 (Arabidopsis thaliana OX%3D3702)
dAg1_00004264	2.56421	0.0470646	Similar to At1g09390: GDSL esterase/lipase At1g09390 (Arabidopsis thaliana OX%3D3702)
dAg1_00004303	1.77984	0.0369253	Similar to PIF3: Transcription factor PIF3 (Arabidopsis thaliana OX%3D3702)
dAg1_00004306	2.97194	0.0298651	Similar to At4g34215: Probable carbohydrate esterase At4g34215 (Arabidopsis thaliana OX%3D3702)
dAg1_00004517	2.96176	0.00791383	Similar to GLUB2: Glutelin type-B 2 (Oryza sativa subsp. japonica OX%3D39947)
dAg1_00004711	2.08623	0.0136453	Protein of unknown function
dAg1_00004715	1.92246	0.0458694	Similar to CAP10B: Chlorophyll a-b binding protein CP24 10B%2C chloroplastic (Solanum lycopersicum OX%3D4081)
dAg1_00005039	6.20896	0.0197666	Similar to AGP18: Lysine-rich arabinogalactan protein 18 (Arabidopsis thaliana OX%3D3702)
dAg1_00005249	5.69025	0.00885737	Similar to LPAT5: Probable 1-acyl-sn-glycerol-3-phosphate acyltransferase 5 (Arabidopsis thaliana OX%3D3702)
dAg1_00005265	7.87322	0.0329862	Protein of unknown function
dAg1_00005267	4.49095	0.00252205	Similar to USPL1: BURP domain protein USPL1 (Arabidopsis thaliana OX%3D3702)
dAg1_00005391	2.29172	0.0207558	Similar to Auxin-responsive protein SAUR50 (Helianthus annuus OX%3D4232)
dAg1_00005412	4.26414	0.0127646	Similar to SAUR21: Auxin-responsive protein SAUR21 (Arabidopsis thaliana OX%3D3702)
dAg1_00005484	6.19047	0.000138269	Similar to PIP2-7: Aquaporin PIP2-7 (Arabidopsis thaliana OX%3D3702)
dAg1_00006430	11.2606	0.0407888	Similar to SOT5: Cytosolic sulfotransferase 5 (Arabidopsis thaliana OX%3D3702)
dAg1_00006586	6.63101	0.018033	Similar to MES3: Methylesterase 3 (Arabidopsis thaliana OX%3D3702)
dAg1_00006608	3.81224	0.0433584	Similar to At2g38370: WEB family protein At2g38370 (Arabidopsis thaliana OX%3D3702)
dAg1_00006892	1.8004	0.00590434	Protein of unknown function
dAg1_00007283	3.03668	0.0171939	Protein of unknown function
dAg1_00007812	1.78168	0.0171996	Similar to RRF: Ribosome-recycling factor%2C chloroplastic (Arabidopsis thaliana OX%3D3702)
dAg1_00007886	2.13397	0.032413	Similar to IAA3: Auxin-responsive protein IAA3 (Arabidopsis thaliana OX%3D3702)
dAg1_00008246	2.12469	0.00737959	Similar to GSVIVT00026920001: Probable polygalacturonase (Vitis vinifera OX%3D29760)
dAg1_00008381	4.05612	0.00085537	Similar to IQD31: Protein IQ-DOMAIN 31 (Arabidopsis thaliana OX%3D3702)
dAg1_00008764	7.66626	7.52324e-05	Similar to At4g13710: Probable pectate lyase 15 (Arabidopsis thaliana OX%3D3702)
dAg1_00009042	3.18893	0.00536532	Similar to CYP716A1: Cytochrome P450 716A1 (Arabidopsis thaliana OX%3D3702)
dAg1_00009133	1.94354	0.0484051	Similar to WDL7: Protein WVD2-like 7 (Arabidopsis thaliana OX%3D3702)
dAg1_00009233	2.53275	0.00184432	Similar to HAT5: Homeobox-leucine zipper protein HAT5 (Arabidopsis thaliana OX%3D3702)
dAg1_00009477	6.61719	2.15932e-06	Similar to PIN3: Auxin efflux carrier component 3 (Arabidopsis thaliana OX%3D3702)
dAg1_00009563	3.93966	0.030683	Similar to MAP70.2: Microtubule-associated protein 70-2 (Arabidopsis thaliana OX%3D3702)
dAg1_00009678	2.56978	0.0121296	Similar to AGAL1: Alpha-galactosidase 1 (Arabidopsis thaliana OX%3D3702)
dAg1_00009813	2.23801	0.0479668	Similar to GSTZ5: Protein IN2-1 homolog B (Oryza sativa subsp. japonica OX%3D39947)
dAg1_00009825	3.21097	0.0366669	Similar to CYP71D10: Cytochrome P450 71D10 (Glycine max OX%3D3847)
dAg1_00009998	13.5867	0.00460474	Protein of unknown function
dAg1_00010144	3.36425	0.00263951	Similar to GLN1-1: Glutamine synthetase cytosolic isozyme 1-1 (Oryza sativa subsp. japonica OX%3D39947)
dAg1_00010513	3.55856	0.00365429	Similar to GULLO6: Probable L-gulonolactone oxidase 6 (Arabidopsis thaliana OX%3D3702)
dAg1_00010608	2.82841	0.0226698	Similar to GLIP1: GDSL esterase/lipase 1 (Arabidopsis thaliana OX%3D3702)
dAg1_00011218	5.93612	0.00911898	Similar to PXL1: Leucine-rich repeat receptor-like protein kinase PXL1 (Arabidopsis thaliana OX%3D3702)
dAg1_00011443	1.79515	0.0479668	Similar to IPS3: Probable inositol 3-phosphate synthase isozyme 3 (Arabidopsis thaliana OX%3D3702)
dAg1_00011472	1.88567	0.0486274	Similar to PNSL4: Photosynthetic NDH subunit of lumenal location 4%2C chloroplastic (Arabidopsis thaliana OX%3D3702)
dAg1_00011572	5.03846	0.0164687	Protein of unknown function
dAg1_00011871	2.71698	0.00041631	Similar to RCH1: LRR receptor-like serine/threonine-protein kinase RCH1 (Arabidopsis thaliana OX%3D3702)
dAg1_00012010	3.64548	0.00241588	Protein of unknown function
dAg1_00012130	1.71998	0.0451395	Similar to SFH4: Phosphatidylinositol/phosphatidylcholine transfer protein SFH4 (Arabidopsis thaliana OX%3D3702)
dAg1_00012149	3.72304	0.0463958	Protein of unknown function
dAg1_00012264	2.43035	0.00130875	Similar to TL29: Thylakoid lumenal 29 kDa protein%2C chloroplastic (Arabidopsis thaliana OX%3D3702)
dAg1_00012298	1.91159	0.0141178	Protein of unknown function
dAg1_00012445	2.16833	0.00161802	Similar to HEMA1: Glutamyl-tRNA reductase 1%2C chloroplastic (Cucumis sativus OX%3D3659)
dAg1_00012519	4.33224	0.0442843	Protein of unknown function
dAg1_00012615	1.72853	0.0494753	Similar to KIN4A: Kinesin-like protein KIN-4A (Arabidopsis thaliana OX%3D3702)
dAg1_00012705	2.85868	0.00440079	Protein of unknown function
dAg1_00012742	2.10219	0.00184951	Similar to PERK10: Proline-rich receptor-like protein kinase PERK10 (Arabidopsis thaliana OX%3D3702)
dAg1_00012896	2.30194	0.00418175	Protein of unknown function
dAg1_00012903	3.82926	0.0295207	Similar to Os09g0533900: Endoglucanase 24 (Oryza sativa subsp. japonica OX%3D39947)
dAg1_00012963	4.23884	0.000412932	Similar to EXPA1: Expansin-A1 (Oryza sativa subsp. japonica OX%3D39947)
dAg1_00013297	1.99658	0.000544065	Similar to PTAC16: Protein PLASTID TRANSCRIPTIONALLY ACTIVE 16%2C chloroplastic (Arabidopsis thaliana OX%3D3702)
dAg1_00013837	2.05383	0.00494831	Similar to YLMG2: YlmG homolog protein 2%2C chloroplastic (Arabidopsis thaliana OX%3D3702)
dAg1_00013852	3.08964	2.5962e-05	Similar to ERECTA: LRR receptor-like serine/threonine-protein kinase ERECTA (Arabidopsis thaliana OX%3D3702)
dAg1_00013867	5.4452	0.00750885	Protein of unknown function
dAg1_00014565	4.29636	0.0439294	Similar to At1g28650: GDSL esterase/lipase At1g28650 (Arabidopsis thaliana OX%3D3702)
dAg1_00015277	5.04813	0.0239128	Similar to NPF6.3: Protein NRT1/ PTR FAMILY 6.3 (Arabidopsis thaliana OX%3D3702)
dAg1_00015613	3.79542	0.0369262	Similar to CHAT: (Z)-3-hexen-1-ol acetyltransferase (Arabidopsis thaliana OX%3D3702)
dAg1_00015747	5.20066	0.000207851	Similar to KAO1: Ent-kaurenoic acid oxidase 1 (Arabidopsis thaliana OX%3D3702)
dAg1_00015836	1.8668	0.0479668	Protein of unknown function
dAg1_00015837	1.89075	0.0164687	Similar to NIP5-1: Probable aquaporin NIP5-1 (Arabidopsis thaliana OX%3D3702)
dAg1_00015853	2.89394	0.0369544	Protein of unknown function
dAg1_00015958	1.66908	0.028912	Similar to Cysteine synthase%2C chloroplastic/chromoplastic (Capsicum annuum OX%3D4072)
dAg1_00016104	7.63291	0.00342805	Protein of unknown function
dAg1_00016865	2.07713	0.00408184	Similar to At1g67280: Probable lactoylglutathione lyase%2C chloroplastic (Arabidopsis thaliana OX%3D3702)
dAg1_00016928	2.04904	0.0184425	Similar to MAIL3: Serine/threonine-protein phosphatase 7 long form homolog (Arabidopsis thaliana OX%3D3702)
dAg1_00017035	1.95382	0.0305163	Protein of unknown function
dAg1_00017137	1.80125	0.0342337	Similar to CBSPPR1: Pentatricopeptide repeat-containing protein At5g10690 (Arabidopsis thaliana OX%3D3702)
dAg1_00017506	1.89769	0.0460057	Protein of unknown function
dAg1_00017526	1.82601	0.0127883	Similar to At1g32090: CSC1-like protein At1g32090 (Arabidopsis thaliana OX%3D3702)
dAg1_00017580	3.13804	0.0381941	Similar to BHLH71: Transcription factor bHLH71 (Arabidopsis thaliana OX%3D3702)
dAg1_00017701	7.90839	0.00411381	Similar to EXPB13: Expansin-B13 (Oryza sativa subsp. japonica OX%3D39947)
dAg1_00017742	4.44531	0.0123818	Similar to HAT4: Homeobox-leucine zipper protein HAT4 (Arabidopsis thaliana OX%3D3702)
dAg1_00017808	2.59209	0.0115375	Protein of unknown function
dAg1_00017847	7.51277	0.000759476	Similar to RGF6: Root meristem growth factor 6 (Arabidopsis thaliana OX%3D3702)
dAg1_00017950	2.24217	0.0455684	Protein of unknown function
dAg1_00018086	2.09642	0.0193529	Similar to At1g63850: BTB/POZ domain-containing protein At1g63850 (Arabidopsis thaliana OX%3D3702)
dAg1_00018197	2.17203	0.00851609	Similar to PI4KG4: Phosphatidylinositol 4-kinase gamma 4 (Arabidopsis thaliana OX%3D3702)
dAg1_00018277	1.97011	0.0090986	Similar to RPL11: 50S ribosomal protein L11%2C chloroplastic (Arabidopsis thaliana OX%3D3702)
dAg1_00018374	2.00579	0.0475769	Similar to LHCB3: Chlorophyll a-b binding protein 3%2C chloroplastic (Arabidopsis thaliana OX%3D3702)
dAg1_00018375	2.88871	0.0085382	Similar to LHCB7: Chlorophyll a-b binding protein 7%2C chloroplastic (Arabidopsis thaliana OX%3D3702)
dAg1_00018376	2.77874	0.0173699	Similar to LHCB2.2: Chlorophyll a-b binding protein 2.2%2C chloroplastic (Arabidopsis thaliana OX%3D3702)
dAg1_00018378	3.24605	0.00309058	Protein of unknown function
dAg1_00018379	3.02407	0.013301	Similar to LHCA6: Photosystem I chlorophyll a/b-binding protein 6%2C chloroplastic (Arabidopsis thaliana OX%3D3702)
dAg1_00018380	3.05621	0.0206368	Similar to LHCB4.2: Chlorophyll a-b binding protein CP29.2%2C chloroplastic (Arabidopsis thaliana OX%3D3702)
dAg1_00018381	2.73869	0.0150464	Similar to LHCA2: Photosystem I chlorophyll a/b-binding protein 2%2C chloroplastic (Arabidopsis thaliana OX%3D3702)
dAg1_00018382	4.24086	7.04055e-05	Similar to ISU1: Iron-sulfur cluster assembly protein 1 (Oryza sativa subsp. japonica OX%3D39947)
dAg1_00018383	6.48212	0.000301182	Similar to CAB2R: Chlorophyll a-b binding protein 2%2C chloroplastic (Oryza sativa subsp. japonica OX%3D39947)
dAg1_00018582	3.27328	5.63376e-05	Similar to AEE9: Probable acyl-activating enzyme 9 (Arabidopsis thaliana OX%3D3702)
dAg1_00018706	3.25034	0.0051129	Similar to BHLH63: Transcription factor bHLH63 (Arabidopsis thaliana OX%3D3702)
dAg1_00018773	3.51536	0.00181333	Similar to Chlorophyll a-b binding protein of LHCII type I%2C chloroplastic (Fragment) (Cucumis sativus OX%3D3659)
dAg1_00019255	1.60983	0.0284465	Similar to NDF5: Protein NDH-DEPENDENT CYCLIC ELECTRON FLOW 5 (Arabidopsis thaliana OX%3D3702)
dAg1_00019510	3.77248	0.00241588	Similar to LYK2: Protein LYK2 (Arabidopsis thaliana OX%3D3702)
dAg1_00019549	2.3062	0.0121296	Protein of unknown function
dAg1_00019550	2.15255	0.0251752	Similar to At5g02620: Ankyrin repeat-containing protein At5g02620 (Arabidopsis thaliana OX%3D3702)
dAg1_00020278	2.31009	0.012778	Similar to HIPP07: Heavy metal-associated isoprenylated plant protein 7 (Arabidopsis thaliana OX%3D3702)
dAg1_00020494	8.34639	0.0479668	Similar to HIPP09: Heavy metal-associated isoprenylated plant protein 9 (Arabidopsis thaliana OX%3D3702)
dAg1_00020565	1.92894	0.0055415	Similar to TL17: Thylakoid lumenal 17.4 kDa protein%2C chloroplastic (Arabidopsis thaliana OX%3D3702)
dAg1_00020579	2.04285	0.0361124	Protein of unknown function
dAg1_00020752	1.79005	0.0154618	Similar to HIPP14: Heavy metal-associated isoprenylated plant protein 14 (Arabidopsis thaliana OX%3D3702)
dAg1_00020931	1.7224	0.0475769	Similar to EMB1006: Pentatricopeptide repeat-containing protein At5g50280%2C chloroplastic (Arabidopsis thaliana OX%3D3702)
dAg1_00020936	2.98266	0.00346525	Similar to BT1: BTB/POZ and TAZ domain-containing protein 1 (Arabidopsis thaliana OX%3D3702)
dAg1_00020953	3.61524	0.00750885	Similar to BT1: BTB/POZ and TAZ domain-containing protein 1 (Arabidopsis thaliana OX%3D3702)
dAg1_00020961	51.1768	0.000102328	Protein of unknown function
dAg1_00021048	2.55026	6.90715e-06	Similar to RGI3: LRR receptor-like serine/threonine-protein kinase (Arabidopsis thaliana OX%3D3702)
dAg1_00021215	1.98912	0.0407888	Protein of unknown function
dAg1_00021291	2.0019	0.0407368	Similar to PPL1: PsbP-like protein 1%2C chloroplastic (Arabidopsis thaliana OX%3D3702)
dAg1_00021315	2.7296	0.00262787	Similar to RTNLB1: Reticulon-like protein B1 (Arabidopsis thaliana OX%3D3702)
dAg1_00021362	2.63909	9.94354e-05	Similar to At5g01610: Uncharacterized protein At5g01610 (Arabidopsis thaliana OX%3D3702)
dAg1_00021386	2.15265	0.0232599	Protein of unknown function
dAg1_00021387	1.811	0.0367785	Similar to LHCA4: Chlorophyll a-b binding protein 4%2C chloroplastic (Arabidopsis thaliana OX%3D3702)
dAg1_00021393	2.17814	0.0188495	Similar to CHLP: Geranylgeranyl diphosphate reductase%2C chloroplastic (Arabidopsis thaliana OX%3D3702)
dAg1_00021425	10.7068	5.32171e-06	Similar to DLO1: Protein DMR6-LIKE OXYGENASE 1 (Arabidopsis thaliana OX%3D3702)
dAg1_00021462	2.0684	0.0209619	Similar to ADS3: Palmitoyl-monogalactosyldiacylglycerol delta-7 desaturase%2C chloroplastic (Arabidopsis thaliana OX%3D3702)
dAg1_00021648	2.63089	0.0355424	Similar to At4g14100: Uncharacterized protein At4g14100 (Arabidopsis thaliana OX%3D3702)
dAg1_00021683	3.13738	0.0407888	Similar to RKL1: Probable inactive receptor kinase At1g48480 (Arabidopsis thaliana OX%3D3702)
dAg1_00021778	1.69087	0.0496233	Similar to FKBP17-2: Peptidyl-prolyl cis-trans isomerase FKBP17-2%2C chloroplastic (Arabidopsis thaliana OX%3D3702)
dAg1_00021940	1.79305	0.0145654	Similar to RPS17: 30S ribosomal protein S17%2C chloroplastic (Arabidopsis thaliana OX%3D3702)
dAg1_00021995	4.80483	0.00479284	Similar to At2g04020: GDSL esterase/lipase At2g04020 (Arabidopsis thaliana OX%3D3702)
dAg1_00021996	3.62176	0.00905823	Similar to APG: GDSL esterase/lipase APG (Arabidopsis thaliana OX%3D3702)
dAg1_00022022	3.25638	0.0431941	Similar to PERK13: Proline-rich receptor-like protein kinase PERK13 (Arabidopsis thaliana OX%3D3702)
dAg1_00022254	3.0444	0.00498555	Similar to RIC7: CRIB domain-containing protein RIC7 (Arabidopsis thaliana OX%3D3702)
dAg1_00022283	2.14644	0.0333726	Similar to At1g16220: Probable protein phosphatase 2C 6 (Arabidopsis thaliana OX%3D3702)
dAg1_00022456	2.71861	0.00809178	Similar to PORA: Protochlorophyllide reductase A%2C chloroplastic (Arabidopsis thaliana OX%3D3702)
dAg1_00022557	1.85848	0.000633135	Similar to GLO5: Peroxisomal (S)-2-hydroxy-acid oxidase GLO5 (Arabidopsis thaliana OX%3D3702)
dAg1_00022574	2.3731	0.00309058	Protein of unknown function
dAg1_00022662	9.96982	0.00181467	Similar to EXPB3: Expansin-B3 (Arabidopsis thaliana OX%3D3702)
dAg1_00022700	20.9046	0.0321152	Similar to At5g45960: GDSL esterase/lipase At5g45960 (Arabidopsis thaliana OX%3D3702)
dAg1_00022702	2.37106	0.00055552	Similar to F3GGT1: Cyanidin 3-O-galactoside 2''-O-xylosyltransferase FGGT1 (Actinidia chinensis var. chinensis OX%3D1590841)
dAg1_00022760	2.17072	0.0316045	Similar to BHLH3: Transcription factor bHLH3 (Arabidopsis thaliana OX%3D3702)
dAg1_00022801	2.3615	0.00613706	Protein of unknown function
dAg1_00023725	10.3525	9.22465e-05	Protein of unknown function
dAg1_00023802	2.68065	0.00479284	Similar to SAUR32: Auxin-responsive protein SAUR32 (Arabidopsis thaliana OX%3D3702)
dAg1_00023804	3.16266	0.0171901	Similar to SAUR66: Auxin-responsive protein SAUR66 (Arabidopsis thaliana OX%3D3702)
dAg1_00024245	3.26048	1.60751e-06	Similar to ROPGEF7: Rop guanine nucleotide exchange factor 7 (Arabidopsis thaliana OX%3D3702)
dAg1_00024417	5.70319	0.013301	Similar to OMT3: 5-pentadecatrienyl resorcinol O-methyltransferase (Sorghum bicolor OX%3D4558)
dAg1_00024599	2.00878	0.00243829	Similar to CYP97C1: Carotene epsilon-monooxygenase%2C chloroplastic (Arabidopsis thaliana OX%3D3702)
dAg1_00024869	1.87889	0.00694763	Protein of unknown function
dAg1_00024929	3.20733	0.0442843	Similar to NEK6: Serine/threonine-protein kinase Nek6 (Arabidopsis thaliana OX%3D3702)
dAg1_00025061	4.24685	0.0123917	Similar to GmIF7GT1: Isoflavone 7-O-glucosyltransferase 1 (Glycine max OX%3D3847)
dAg1_00025278	2.41998	0.000100113	Similar to TCP4: Transcription factor TCP4 (Arabidopsis thaliana OX%3D3702)
dAg1_00025338	2.05329	0.00482858	Similar to CYP37: Peptidyl-prolyl cis-trans isomerase CYP37%2C chloroplastic (Arabidopsis thaliana OX%3D3702)
dAg1_00025619	1.96142	0.0297931	Similar to At4g02530: Thylakoid lumenal 16.5 kDa protein%2C chloroplastic (Arabidopsis thaliana OX%3D3702)
dAg1_00025697	2.05085	0.0363104	Protein of unknown function
dAg1_00025699	1.94837	0.0234386	Protein of unknown function
dAg1_00025719	1.84673	0.0226698	Similar to MED20A: Mediator of RNA polymerase II transcription subunit 20a (Arabidopsis thaliana OX%3D3702)
dAg1_00025721	1.94123	0.0211785	Protein of unknown function
dAg1_00025723	4.68248	0.0106199	Protein of unknown function
dAg1_00025725	2.12082	0.0196881	Protein of unknown function
dAg1_00025753	2.18313	0.00077157	Similar to MYBS3: Transcription factor MYBS3 (Oryza sativa subsp. japonica OX%3D39947)
dAg1_00026020	2.5998	0.0174361	Similar to COL9: Zinc finger protein CONSTANS-LIKE 9 (Arabidopsis thaliana OX%3D3702)
dAg1_00026022	2.51158	0.0365979	Similar to LHCB2.1: Chlorophyll a-b binding protein 2.1%2C chloroplastic (Arabidopsis thaliana OX%3D3702)
dAg1_00026037	3.69862	0.00133946	Protein of unknown function
dAg1_00027327	7.53092	0.000633135	Similar to CYP76C4: Cytochrome P450 76C4 (Arabidopsis thaliana OX%3D3702)
dAg1_00027412	18.2189	3.63659e-09	Similar to TIP2-1: Aquaporin TIP2-1 (Arabidopsis thaliana OX%3D3702)
dAg1_00027513	3.16206	0.0150946	Similar to bkr3: 3-oxoacyl-[acyl-carrier-protein] reductase 3%2C chloroplastic (Brassica napus OX%3D3708)
dAg1_00027585	2.26184	0.0461295	Similar to ABP19A: Auxin-binding protein ABP19a (Prunus persica OX%3D3760)
dAg1_00027609	4.69689	7.52324e-05	Similar to bkr3: 3-oxoacyl-[acyl-carrier-protein] reductase 3%2C chloroplastic (Brassica napus OX%3D3708)
dAg1_00027837	3.25362	0.049753	Similar to PUP3: Purine permease 3 (Arabidopsis thaliana OX%3D3702)
dAg1_00027839	2.12761	0.00460474	Protein of unknown function
dAg1_00027844	3.45043	0.000509003	Similar to PUP4: Probable purine permease 4 (Arabidopsis thaliana OX%3D3702)
dAg1_00027845	2.42556	0.00494495	Similar to PUP3: Purine permease 3 (Arabidopsis thaliana OX%3D3702)
dAg1_00027847	2.71365	0.00615459	Protein of unknown function
dAg1_00027872	1.82341	0.0486406	Similar to AAP1: Amino acid permease 1 (Arabidopsis thaliana OX%3D3702)
dAg1_00028407	1.76035	0.037156	Similar to RPL18: 50S ribosomal protein L18%2C chloroplastic (Arabidopsis thaliana OX%3D3702)
dAg1_00028544	2.0133	0.000742219	Protein of unknown function
dAg1_00028548	1.79889	0.0202042	Similar to RPL6: 50S ribosomal protein L6%2C chloroplastic (Arabidopsis thaliana OX%3D3702)
dAg1_00028628	2.09474	0.000138561	Similar to PHS1: Alpha-glucan phosphorylase 1 (Arabidopsis thaliana OX%3D3702)
dAg1_00028747	3.07041	3.03147e-05	Similar to SOT2: Putative cytosolic sulfotransferase 2 (Arabidopsis thaliana OX%3D3702)
dAg1_00028750	2.16172	0.0290493	Protein of unknown function
dAg1_00028751	2.69765	0.00852762	Protein of unknown function
dAg1_00028863	4.67604	0.00154996	Similar to PII-2: Piriformospora indica-insensitive protein 2 (Arabidopsis thaliana OX%3D3702)
dAg1_00028868	3.0973	0.0479536	Similar to CYB561D: Probable transmembrane ascorbate ferrireductase 4 (Arabidopsis thaliana OX%3D3702)
dAg1_00028876	3.45436	0.00218141	Similar to BHLH30: Transcription factor bHLH30 (Arabidopsis thaliana OX%3D3702)
dAg1_00028898	3.74174	0.00235748	Similar to HHO3: Transcription factor HHO3 (Arabidopsis thaliana OX%3D3702)
dAg1_00028941	5.16359	0.0369262	Similar to XYL1: Alpha-xylosidase 1 (Arabidopsis thaliana OX%3D3702)
dAg1_00028969	13.5018	2.70834e-05	Similar to KCS1: 3-ketoacyl-CoA synthase 1 (Arabidopsis thaliana OX%3D3702)
dAg1_00029101	2.16203	0.0134943	Similar to HIPP37: Heavy metal-associated isoprenylated plant protein 37 (Arabidopsis thaliana OX%3D3702)
dAg1_00029108	1.97496	0.00533607	Similar to MYB3: Transcription factor MYB3 (Arabidopsis thaliana OX%3D3702)
dAg1_00029151	1.91093	0.00211915	Similar to DMAS1: Deoxymugineic acid synthase 1 (Oryza sativa subsp. japonica OX%3D39947)
dAg1_00029326	2.33302	0.00793148	Similar to At1g14390: Probable LRR receptor-like serine/threonine-protein kinase At1g14390 (Arabidopsis thaliana OX%3D3702)
dAg1_00029398	2.37165	0.00427064	Similar to BHLH089: Transcription factor BHLH089 (Oryza sativa subsp. japonica OX%3D39947)
dAg1_00029659	6.25557	0.000370642	Similar to At1g48100: Polygalacturonase At1g48100 (Arabidopsis thaliana OX%3D3702)
dAg1_00029671	1.76687	0.0382281	Similar to MAPKKK18: Mitogen-activated protein kinase kinase kinase 18 (Arabidopsis thaliana OX%3D3702)
dAg1_00029796	2.07222	0.00321607	Similar to At1g67900: BTB/POZ domain-containing protein At1g67900 (Arabidopsis thaliana OX%3D3702)
dAg1_00029908	4.56094	0.0218811	Similar to At1g67750: Probable pectate lyase 5 (Arabidopsis thaliana OX%3D3702)
dAg1_00030030	2.0686	0.031967	Similar to LTPG1: Non-specific lipid transfer protein GPI-anchored 1 (Arabidopsis thaliana OX%3D3702)
dAg1_00030223	2.0714	0.0317315	Similar to ABCG32: ABC transporter G family member 32 (Arabidopsis thaliana OX%3D3702)
dAg1_00030818	3.68777	0.00947446	Similar to At2g04570: GDSL esterase/lipase At2g04570 (Arabidopsis thaliana OX%3D3702)
dAg1_00031192	2.08105	0.0164687	Similar to EPFL1: EPIDERMAL PATTERNING FACTOR-like protein 1 (Arabidopsis thaliana OX%3D3702)
dAg1_00031220	3.49247	0.0121296	Similar to TDR: Leucine-rich repeat receptor-like protein kinase TDR (Arabidopsis thaliana OX%3D3702)
dAg1_00031836	2.03815	0.0232341	Protein of unknown function
dAg1_00031838	1.83282	0.0248912	Similar to LHCA1: Chlorophyll a-b binding protein 6%2C chloroplastic (Arabidopsis thaliana OX%3D3702)
dAg1_00031926	5.82057	9.54396e-06	Similar to PME40: Probable pectinesterase/pectinesterase inhibitor 40 (Arabidopsis thaliana OX%3D3702)
dAg1_00032054	5.12303	0.0198757	Similar to IAA3: Auxin-responsive protein IAA3 (Arabidopsis thaliana OX%3D3702)
dAg1_00032544	8.01877	0.0269278	Similar to KCS12: 3-ketoacyl-CoA synthase 12 (Arabidopsis thaliana OX%3D3702)
dAg1_00032982	1.7562	0.0232341	Similar to RPL3A: 50S ribosomal protein L3-1%2C chloroplastic (Arabidopsis thaliana OX%3D3702)
dAg1_00033107	3.96667	0.00458082	Similar to EXPA8: Expansin-A8 (Arabidopsis thaliana OX%3D3702)
dAg1_00033397	2.44632	7.35571e-05	Similar to At4g27700: Rhodanese-like domain-containing protein 14%2C chloroplastic (Arabidopsis thaliana OX%3D3702)
dAg1_00033452	14.7403	1.86114e-11	Similar to PPCK1: Phosphoenolpyruvate carboxylase kinase 1 (Arabidopsis thaliana OX%3D3702)
dAg1_00033490	1.9417	0.00852762	Protein of unknown function
dAg1_00033635	6.25452	0.0350926	Protein of unknown function
dAg1_00033706	2.35978	0.00139623	Similar to CAO: Chlorophyllide a oxygenase%2C chloroplastic (Arabidopsis thaliana OX%3D3702)
dAg1_00033717	2.69894	7.35571e-05	Protein of unknown function
dAg1_00033719	2.37294	0.0211585	Similar to AZI1: pEARLI1-like lipid transfer protein 1 (Arabidopsis thaliana OX%3D3702)
dAg1_00033909	1.73201	0.0449108	Similar to B'KAPPA: Serine/threonine protein phosphatase 2A 57 kDa regulatory subunit B' kappa isoform (Arabidopsis thaliana OX%3D3702)
dAg1_00033911	3.72078	0.0114956	Similar to CYCA2-1: Cyclin-A2-1 (Oryza sativa subsp. japonica OX%3D39947)
dAg1_00033957	1.73632	0.0454269	Similar to CPK4: Calcium-dependent protein kinase 4 (Arabidopsis thaliana OX%3D3702)
dAg1_00034077	2.48115	0.000382579	Similar to AKHSDH2: Bifunctional aspartokinase/homoserine dehydrogenase 2%2C chloroplastic (Arabidopsis thaliana OX%3D3702)
dAg1_00034124	2.82148	0.0386882	Similar to MSR1: Protein MANNAN SYNTHESIS-RELATED 1 (Arabidopsis thaliana OX%3D3702)
dAg1_00034197	3.31078	0.0030793	Similar to BHLH87: Transcription factor bHLH87 (Arabidopsis thaliana OX%3D3702)
dAg1_00034370	2.63759	0.00850577	Similar to SCPL45: Serine carboxypeptidase-like 45 (Arabidopsis thaliana OX%3D3702)
dAg1_00034413	6.99671	0.00158818	Similar to RRT1: Rhamnogalacturonan I rhamnosyltransferase 1 (Arabidopsis thaliana OX%3D3702)
dAg1_00034464	8.34557	7.08318e-06	Similar to LHCA4: Chlorophyll a-b binding protein 4%2C chloroplastic (Arabidopsis thaliana OX%3D3702)
dAg1_00034477	3.9406	0.00438753	Similar to TCP14: Transcription factor TCP14 (Arabidopsis thaliana OX%3D3702)
dAg1_00034540	1.75628	0.0443175	Similar to BOR2: Probable boron transporter 2 (Arabidopsis thaliana OX%3D3702)
dAg1_00034583	9.9126	0.0385883	Protein of unknown function
dAg1_00034586	1.97771	0.00613706	Similar to NDPK2: Nucleoside diphosphate kinase II%2C chloroplastic (Arabidopsis thaliana OX%3D3702)
dAg1_00034631	3.01575	0.0248912	Similar to SGR5: Zinc finger protein SHOOT GRAVITROPISM 5 (Arabidopsis thaliana OX%3D3702)
dAg1_00034774	4.93751	0.0326236	Similar to BXL4: Beta-D-xylosidase 4 (Arabidopsis thaliana OX%3D3702)
dAg1_00034776	6.38825	0.0188922	Similar to BXL2: Probable beta-D-xylosidase 2 (Arabidopsis thaliana OX%3D3702)
dAg1_00034845	2.43867	0.0229165	Similar to FRI: Inactive protein FRIGIDA (Arabidopsis thaliana OX%3D3702)
dAg1_00034871	2.04703	0.0447935	Similar to TIP1-1: Probable aquaporin TIP1-1 (Oryza sativa subsp. japonica OX%3D39947)
dAg1_00034925	1.8012	0.0332144	Similar to KIN5D: Kinesin-like protein KIN-5D (Arabidopsis thaliana OX%3D3702)
dAg1_00034987	3.92952	0.0288309	Similar to PP2CA: Protein phosphatase 2C 37 (Arabidopsis thaliana OX%3D3702)
dAg1_00035010	2.99977	0.00332005	Similar to PER47: Peroxidase 47 (Arabidopsis thaliana OX%3D3702)
dAg1_00035158	2.06172	0.0314622	Similar to PSAE2: Photosystem I reaction center subunit IV B%2C chloroplastic (Arabidopsis thaliana OX%3D3702)
dAg1_00035160	1.96122	0.00216375	Similar to TRM32: Protein TRM32 (Arabidopsis thaliana OX%3D3702)
dAg1_00035161	3.91922	0.000328299	Similar to At5g33370: GDSL esterase/lipase At5g33370 (Arabidopsis thaliana OX%3D3702)
dAg1_00035180	2.34616	0.024259	Similar to FIM2: Fimbrin-2 (Arabidopsis thaliana OX%3D3702)
dAg1_00035243	2.0169	0.0254189	Similar to PSAE2: Photosystem I reaction center subunit IV B%2C chloroplastic (Arabidopsis thaliana OX%3D3702)
dAg1_00035433	5.49369	0.0327484	Protein of unknown function
dAg1_00035536	1.72347	0.0151053	Similar to GAI: DELLA protein GAI (Solanum lycopersicum OX%3D4081)
dAg1_00035635	5.21418	0.00415139	Protein of unknown function
dAg1_00035666	2.59267	0.000713993	Protein of unknown function
dAg1_00035675	1.83239	0.0369544	Similar to At4g39970: Haloacid dehalogenase-like hydrolase domain-containing protein At4g39970 (Arabidopsis thaliana OX%3D3702)
dAg1_00035745	2.27698	0.0181383	Similar to FACT: Fatty alcohol:caffeoyl-CoA acyltransferase (Arabidopsis thaliana OX%3D3702)
dAg1_00035752	2.53743	0.0259427	Similar to APUM4: Pumilio homolog 4 (Arabidopsis thaliana OX%3D3702)
dAg1_00035861	2.7572	0.000153449	Similar to Os11g0148500: Pyruvate kinase 1%2C cytosolic (Oryza sativa subsp. japonica OX%3D39947)
dAg1_00036665	1.66863	0.0479374	Similar to CAO: Chlorophyllide a oxygenase%2C chloroplastic (Arabidopsis thaliana OX%3D3702)
dAg1_00036774	4.67677	4.36488e-05	Similar to ARPI: Proteinase inhibitor type-2 TR8 (Solanum lycopersicum OX%3D4081)
dAg1_00037100	1.71293	0.0263264	Protein of unknown function
dAg1_00037384	4.56788	0.0105334	Protein of unknown function
dAg1_00037827	2.07058	0.00355715	Similar to RPL9: 50S ribosomal protein L9%2C chloroplastic (Arabidopsis thaliana OX%3D3702)
dAg1_00038005	2.99661	0.00154996	Similar to BGAL8: Beta-galactosidase 8 (Arabidopsis thaliana OX%3D3702)
dAg1_00038300	2.25567	0.0217306	Similar to TET3: Tetraspanin-3 (Arabidopsis thaliana OX%3D3702)
dAg1_00038366	6.21767	7.35571e-05	Similar to NAKR2: Protein SODIUM POTASSIUM ROOT DEFECTIVE 2 (Arabidopsis thaliana OX%3D3702)
dAg1_00038381	1.80603	0.0196205	Protein of unknown function
dAg1_00038532	2.74077	0.0325324	Similar to ATL49: Putative RING-H2 finger protein ATL49 (Arabidopsis thaliana OX%3D3702)
dAg1_00038579	14.8561	0.0442833	Protein of unknown function
dAg1_00038581	3.211	1.73358e-06	Similar to RNS3: Ribonuclease 3 (Arabidopsis thaliana OX%3D3702)
dAg1_00038595	5.16524	0.000869042	Similar to PR-1: Pathogenesis-related protein PR-1 (Medicago truncatula OX%3D3880)
dAg1_00038667	3.03907	1.51339e-06	Protein of unknown function
dAg1_00038720	2.3248	0.0275595	Similar to SD2: Defensin SD2 (Helianthus annuus OX%3D4232)
dAg1_00038858	2.01524	0.0208648	Similar to CIA2: Protein CHLOROPLAST IMPORT APPARATUS 2 (Arabidopsis thaliana OX%3D3702)
dAg1_00038883	3.71892	0.000225326	Similar to MLP43: MLP-like protein 43 (Arabidopsis thaliana OX%3D3702)
dAg1_00038979	2.45745	0.0444322	Similar to PLA2-ALPHA: Phospholipase A2-alpha (Arabidopsis thaliana OX%3D3702)
dAg1_00039165	7.04257	0.000704839	Similar to SMXL4: Protein SMAX1-LIKE 4 (Arabidopsis thaliana OX%3D3702)
dAg1_00039556	4.82186	0.037156	Protein of unknown function
dAg1_00039751	2.0817	0.0463958	Similar to PRXQ: Peroxiredoxin Q%2C chloroplastic (Arabidopsis thaliana OX%3D3702)
dAg1_00039998	1.67502	0.0203692	Similar to G6PD1: Glucose-6-phosphate 1-dehydrogenase 1%2C chloroplastic (Arabidopsis thaliana OX%3D3702)
dAg1_00040161	2.83963	0.00827861	Similar to HPL: Fatty acid hydroperoxide lyase%2C chloroplastic (Solanum lycopersicum OX%3D4081)
dAg1_00040256	19.2741	9.82344e-07	Similar to PER3: Peroxidase 3 (Arabidopsis thaliana OX%3D3702)
dAg1_00040300	1.66812	0.0437644	Protein of unknown function
dAg1_00040474	3.12384	1.4751e-09	Similar to POR1: Protochlorophyllide reductase%2C chloroplastic (Daucus carota OX%3D4039)
dAg1_00040649	8.46607	0.00177794	Similar to TBL43: Protein trichome birefringence-like 43 (Arabidopsis thaliana OX%3D3702)
dAg1_00040763	3.84199	0.000921964	Similar to ICR4: Interactor of constitutive active ROPs 4 (Arabidopsis thaliana OX%3D3702)
dAg1_00040859	4.00009	0.0018532	Similar to BZIP61: Basic leucine zipper 61 (Arabidopsis thaliana OX%3D3702)
dAg1_00040929	6.58458	1.97919e-05	Protein of unknown function
dAg1_00041030	2.80225	0.00351846	Protein of unknown function
dAg1_00041031	2.99721	0.000106489	Similar to PME18: Pectinesterase/pectinesterase inhibitor 18 (Arabidopsis thaliana OX%3D3702)
dAg1_00041114	3.42963	0.0408086	Protein of unknown function
dAg1_00042107	2.37254	0.0207558	Similar to BEE2: Transcription factor BEE 2 (Arabidopsis thaliana OX%3D3702)
dAg1_00042141	2.83983	0.0197666	Similar to Bp10: L-ascorbate oxidase homolog (Brassica napus OX%3D3708)
dAg1_00042221	19.0541	1.13237e-07	Protein of unknown function
dAg1_00042569	1.97061	0.0414268	Similar to CLC-B: Chloride channel protein CLC-b (Arabidopsis thaliana OX%3D3702)
dAg1_00042643	2.01404	0.00322408	Similar to At2g35130: Pentatricopeptide repeat-containing protein At2g35130 (Arabidopsis thaliana OX%3D3702)
dAg1_00042679	2.92746	0.0488045	Similar to CATHB3: Cathepsin B-like protease 3 (Arabidopsis thaliana OX%3D3702)
dAg1_00042723	2.0297	0.0167771	Similar to PSAF: Photosystem I reaction center subunit III%2C chloroplastic (Arabidopsis thaliana OX%3D3702)
dAg1_00042889	3.28103	0.045761	Similar to Chlorophyll a-b binding protein of LHCII type I%2C chloroplastic (Fragment) (Cucumis sativus OX%3D3659)
dAg1_00042903	2.84493	0.000139847	Similar to At4g36180: Probable LRR receptor-like serine/threonine-protein kinase At4g36180 (Arabidopsis thaliana OX%3D3702)
dAg1_00042904	2.44169	0.0217852	Protein of unknown function
dAg1_00042906	6.71923	1.20791e-05	Protein of unknown function
dAg1_00042908	5.26682	0.00838395	Similar to LHCB7: Chlorophyll a-b binding protein 7%2C chloroplastic (Arabidopsis thaliana OX%3D3702)
dAg1_00042909	7.87373	8.29286e-06	Similar to Chlorophyll a-b binding protein of LHCII type I%2C chloroplastic (Fragment) (Cucumis sativus OX%3D3659)
dAg1_00042910	2.04049	0.0412446	Similar to LHCB3: Chlorophyll a-b binding protein 3%2C chloroplastic (Arabidopsis thaliana OX%3D3702)
dAg1_00043125	1.82353	0.0085382	Protein of unknown function
dAg1_00043127	1.99096	0.0317315	Similar to DAD1: Phospholipase A(1) DAD1%2C chloroplastic (Arabidopsis thaliana OX%3D3702)
dAg1_00043160	3.49414	0.00111015	Similar to DSEL: Phospholipase A1-IIgamma (Arabidopsis thaliana OX%3D3702)
dAg1_00043282	2.62387	0.00929469	Protein of unknown function
dAg1_00043301	2.68446	0.0085382	Similar to BGAL8: Beta-galactosidase 8 (Arabidopsis thaliana OX%3D3702)
dAg1_00043343	2.26548	0.0392899	Similar to TIR1: Protein TRANSPORT INHIBITOR RESPONSE 1 (Arabidopsis thaliana OX%3D3702)
dAg1_00043550	1.82035	0.0363886	Similar to EMB2369: Leucine--tRNA ligase%2C chloroplastic/mitochondrial (Arabidopsis thaliana OX%3D3702)
dAg1_00043811	2.41918	0.0412446	Similar to PIP2-7: Aquaporin PIP2-7 (Arabidopsis thaliana OX%3D3702)
dAg1_00043905	1.81771	0.0358786	Similar to KIN7H: Kinesin-like protein KIN-7H (Arabidopsis thaliana OX%3D3702)
dAg1_00044069	1.99132	0.0419868	Similar to RBCS-2A: Ribulose bisphosphate carboxylase small chain 2A%2C chloroplastic (Solanum lycopersicum OX%3D4081)
dAg1_00044168	1.91206	0.0195852	Protein of unknown function
dAg1_00044240	1.94477	0.0347508	Similar to NPY2: BTB/POZ domain-containing protein NPY2 (Arabidopsis thaliana OX%3D3702)
dAg1_00044461	1.99978	0.0332102	Similar to At5g66560: BTB/POZ domain-containing protein At5g66560 (Arabidopsis thaliana OX%3D3702)
dAg1_00044509	2.32143	0.00561199	Similar to NIK1: Protein NSP-INTERACTING KINASE 1 (Arabidopsis thaliana OX%3D3702)
dAg1_00044550	4.86724	1.01297e-08	Similar to CYP85A1: Cytochrome P450 85A1 (Solanum lycopersicum OX%3D4081)
dAg1_00044629	2.98888	0.00136004	Similar to MYB16: Transcription factor MYB16 (Arabidopsis thaliana OX%3D3702)
dAg1_00044724	1.7252	0.0308222	Protein of unknown function
dAg1_00044754	2.39057	0.00371986	Similar to CYP38: Peptidyl-prolyl cis-trans isomerase CYP38%2C chloroplastic (Arabidopsis thaliana OX%3D3702)
dAg1_00044770	3.83159	0.00181333	Similar to BCA1: Beta carbonic anhydrase 1%2C chloroplastic (Arabidopsis thaliana OX%3D3702)
dAg1_00044816	4.09738	0.00366938	Similar to D6PKL3: Serine/threonine-protein kinase D6PKL3 (Arabidopsis thaliana OX%3D3702)
dAg1_00044825	2.19953	0.0249759	Protein of unknown function

## Sheet: TableS4
Table S4. Differentially expressed genes identified between Cayuga control and drought-primed plants using DESeq2.
Gene	Fold change	Adjusted p-value	Description
dAg1_00019697	-5.45536	0.000323256	Similar to ERF105: Ethylene-responsive transcription factor ERF105 (Arabidopsis thaliana OX%3D3702)
dAg1_00015073	-3.77433	5.10354e-06	Protein of unknown function
dAg1_00028468	-3.56282	0.030617	Protein of unknown function
dAg1_00017924	-3.53322	5.0644e-05	Similar to At4g22758: Uncharacterized protein At4g22758 (Arabidopsis thaliana OX%3D3702)
dAg1_00010378	-3.45604	0.0430176	Protein of unknown function
dAg1_00006177	-3.42154	0.00357799	Similar to PAL1: Phenylalanine ammonia-lyase 1 (Daucus carota OX%3D4039)
dAg1_00029863	-2.91195	0.000837896	Protein of unknown function
dAg1_00018258	-2.75319	0.0486162	Similar to BDG3: Probable lysophospholipase BODYGUARD 3 (Arabidopsis thaliana OX%3D3702)
dAg1_00015991	-2.74213	0.0236071	Similar to At5g02620: Ankyrin repeat-containing protein At5g02620 (Arabidopsis thaliana OX%3D3702)
dAg1_00020011	-2.65239	0.0465801	Protein of unknown function
dAg1_00011443	-2.58855	0.00753959	Similar to IPS3: Probable inositol 3-phosphate synthase isozyme 3 (Arabidopsis thaliana OX%3D3702)
dAg1_00018647	-2.50023	0.043653	Protein of unknown function
dAg1_00033807	-2.48591	0.0056038	Similar to SNL6: Cinnamoyl-CoA reductase-like SNL6 (Oryza sativa subsp. japonica OX%3D39947)
dAg1_00034239	-2.44035	0.0229652	Similar to CDI: Protein CDI (Arabidopsis thaliana OX%3D3702)
dAg1_00011601	-2.29106	0.017767	Similar to WRKY50: Probable WRKY transcription factor 50 (Arabidopsis thaliana OX%3D3702)
dAg1_00018358	-2.11007	0.00683618	Similar to MYB15: Transcription factor MYB15 (Arabidopsis thaliana OX%3D3702)
dAg1_00021605	-2.1014	0.000121806	Similar to 4CL2: 4-coumarate--CoA ligase 2 (Arabidopsis thaliana OX%3D3702)
dAg1_00012994	-2.03461	0.0335507	Protein of unknown function
dAg1_00044324	-2.02724	0.00316891	Similar to CCOAOMT2: Caffeoyl-CoA O-methyltransferase 2 (Populus trichocarpa OX%3D3694)
dAg1_00015780	-2.006	0.0229652	Similar to ACS6: 1-aminocyclopropane-1-carboxylate synthase 6 (Arabidopsis thaliana OX%3D3702)
dAg1_00021178	-1.96125	0.0271734	Similar to CBP60A: Calmodulin-binding protein 60 A (Arabidopsis thaliana OX%3D3702)
dAg1_00007846	-1.92096	0.00753959	Similar to SULTR3%3B1: Sulfate transporter 3.1 (Arabidopsis thaliana OX%3D3702)
dAg1_00025600	-1.86177	0.030617	Similar to RPA1B: Replication protein A 70 kDa DNA-binding subunit B (Oryza sativa subsp. japonica OX%3D39947)
dAg1_00008925	-1.74118	0.016456	Similar to CER26: Protein ECERIFERUM 26 (Arabidopsis thaliana OX%3D3702)
dAg1_00022228	-1.64215	0.0430176	Similar to LHY: Protein LHY (Arabidopsis thaliana OX%3D3702)
dAg1_00012243	-1.51779	0.0372481	Similar to DHS2: Phospho-2-dehydro-3-deoxyheptonate aldolase 2%2C chloroplastic (Arabidopsis thaliana OX%3D3702)
dAg1_00000055	1.92832	0.000121806	Similar to RLM1B: Disease resistance protein RML1B (Arabidopsis thaliana OX%3D3702)
dAg1_00000059	2.0838	0.00753959	Similar to RPP13: Disease resistance protein RPP13 (Arabidopsis thaliana OX%3D3702)
dAg1_00000353	1.79549	0.00239777	Similar to LECRK2: G-type lectin S-receptor-like serine/threonine-protein kinase LECRK2 (Oryza sativa subsp. indica OX%3D39946)
dAg1_00000494	1.68145	0.000121806	Similar to WNK4: Probable serine/threonine-protein kinase WNK4 (Arabidopsis thaliana OX%3D3702)
dAg1_00004244	2.56949	0.0236071	Protein of unknown function
dAg1_00006721	2.18541	0.043653	Similar to RPP13: Disease resistance protein RPP13 (Arabidopsis thaliana OX%3D3702)
dAg1_00008144	1.69051	0.0119289	Similar to COL14: Zinc finger protein CONSTANS-LIKE 14 (Arabidopsis thaliana OX%3D3702)
dAg1_00009965	1.61167	0.000965344	Similar to PBL9: Probable serine/threonine-protein kinase PBL9 (Arabidopsis thaliana OX%3D3702)
dAg1_00011113	1.54737	0.0179246	Similar to MLO6: MLO-like protein 6 (Arabidopsis thaliana OX%3D3702)
dAg1_00012170	2.28245	7.45789e-08	Protein of unknown function
dAg1_00012171	2.00833	0.000192409	Similar to MIK2: MDIS1-interacting receptor like kinase 2 (Arabidopsis thaliana OX%3D3702)
dAg1_00012172	2.19859	1.79941e-06	Similar to BAM1: Leucine-rich repeat receptor-like serine/threonine-protein kinase BAM1 (Arabidopsis thaliana OX%3D3702)
dAg1_00012174	1.79445	0.00753959	Similar to At1g35710: Probable leucine-rich repeat receptor-like protein kinase At1g35710 (Arabidopsis thaliana OX%3D3702)
dAg1_00012175	1.64658	0.017767	Similar to At5g63930: Probable leucine-rich repeat receptor-like protein kinase At5g63930 (Arabidopsis thaliana OX%3D3702)
dAg1_00012181	1.7769	0.0127598	Protein of unknown function
dAg1_00013412	1.65973	0.0127598	Similar to At5g10770: Aspartyl protease family protein At5g10770 (Arabidopsis thaliana OX%3D3702)
dAg1_00014167	1.53138	0.0437801	Similar to At1g29970: 60S ribosomal protein L18a-like protein (Arabidopsis thaliana OX%3D3702)
dAg1_00014472	1.37884	0.032935	Similar to GAD1: Glutamate decarboxylase 1 (Arabidopsis thaliana OX%3D3702)
dAg1_00017119	1.53077	0.017767	Similar to At5g10770: Aspartyl protease family protein At5g10770 (Arabidopsis thaliana OX%3D3702)
dAg1_00018442	1.5186	0.043653	Similar to At3g47570: Probable LRR receptor-like serine/threonine-protein kinase At3g47570 (Arabidopsis thaliana OX%3D3702)
dAg1_00018693	1.79219	0.017767	Similar to HSR4: Protein HYPER-SENSITIVITY-RELATED 4 (Arabidopsis thaliana OX%3D3702)
dAg1_00020351	1.7192	0.00845917	Similar to PUB43: U-box domain-containing protein 43 (Arabidopsis thaliana OX%3D3702)
dAg1_00020401	1.70967	0.032119	Similar to DMR6: Protein DOWNY MILDEW RESISTANCE 6 (Arabidopsis thaliana OX%3D3702)
dAg1_00020634	1.51239	0.0430176	Similar to CNGC1: Cyclic nucleotide-gated ion channel 1 (Arabidopsis thaliana OX%3D3702)
dAg1_00020945	1.60049	0.00753959	Similar to MHF2: Protein MHF2 homolog (Arabidopsis thaliana OX%3D3702)
dAg1_00020956	1.42469	0.0447832	Similar to AGO4B: Protein argonaute 4B (Oryza sativa subsp. japonica OX%3D39947)
dAg1_00020959	1.50915	0.010276	Similar to SOBIR1: Leucine-rich repeat receptor-like serine/threonine/tyrosine-protein kinase SOBIR1 (Arabidopsis thaliana OX%3D3702)
dAg1_00028908	1.79238	0.000192409	Similar to RPP8L2: Probable disease resistance RPP8-like protein 2 (Arabidopsis thaliana OX%3D3702)
dAg1_00031003	2.18696	0.0102255	Similar to WRKY41: Probable WRKY transcription factor 41 (Arabidopsis thaliana OX%3D3702)
dAg1_00031006	1.86362	0.000192409	Similar to WRKY53: Probable WRKY transcription factor 53 (Arabidopsis thaliana OX%3D3702)
dAg1_00033139	2.51965	0.043653	Similar to At3g47570: Probable LRR receptor-like serine/threonine-protein kinase At3g47570 (Arabidopsis thaliana OX%3D3702)
dAg1_00035932	1.53379	0.0329888	Similar to PR5K: PR5-like receptor kinase (Arabidopsis thaliana OX%3D3702)
dAg1_00035952	3.42436	0.00639733	Similar to PK1: Putative receptor protein kinase ZmPK1 (Zea mays OX%3D4577)
dAg1_00035979	1.95949	0.000579127	Similar to At1g61440: G-type lectin S-receptor-like serine/threonine-protein kinase At1g61440 (Arabidopsis thaliana OX%3D3702)
dAg1_00036127	1.8567	0.0403764	Similar to PR5K: PR5-like receptor kinase (Arabidopsis thaliana OX%3D3702)
dAg1_00036542	1.52371	0.000870916	Similar to SUC1: Sucrose transport protein SUC1 (Arabidopsis thaliana OX%3D3702)
dAg1_00036943	1.72402	0.0157567	Similar to GLIP2: GDSL esterase/lipase 2 (Arabidopsis thaliana OX%3D3702)
dAg1_00039847	2.62731	0.043653	Similar to UGT71B5: UDP-glycosyltransferase 71B5 (Arabidopsis thaliana OX%3D3702)
dAg1_00044135	2.09426	0.0229652	Similar to CLPP3: ATP-dependent Clp protease proteolytic subunit 3%2C chloroplastic (Arabidopsis thaliana OX%3D3702)

## Sheet: TableS5
Table S5. Results of Gene Ontology (GO) and KEGG pathway enrichment analysis for differentially expressed genes in Dalila.
GO term	Database	GO ID	Input number	Background number	P_Value	Corrected.P.Value	Input	Category	Direction
plastoglobule	Gene Ontology	GO:0010287	7	14	1.29839e-09	5.0637e-08	dAg1_00026022-RA|dAg1_00042909-RA|dAg1_00018383-RA|dAg1_00042908-RA|dAg1_00018773-RA|dAg1_00018380-RA|dAg1_00018381-RA	CC	Up
chloroplast thylakoid membrane	Gene Ontology	GO:0009535	11	79	2.70595e-09	8.44257e-08	dAg1_00024869-RA|dAg1_00021393-RA|dAg1_00018773-RA|dAg1_00042909-RA|dAg1_00018383-RA|dAg1_00042908-RA|dAg1_00039751-RA|dAg1_00026022-RA|dAg1_00012264-RA|dAg1_00018380-RA|dAg1_00018381-RA	CC	Up
chloroplast envelope	Gene Ontology	GO:0009941	8	34	1.1211e-08	2.91487e-07	dAg1_00032982-RA|dAg1_00026022-RA|dAg1_00042909-RA|dAg1_00018383-RA|dAg1_00042908-RA|dAg1_00018773-RA|dAg1_00018380-RA|dAg1_00018381-RA	CC	Up
plasmodesma	Gene Ontology	GO:0009506	7	109	0.000223297	0.00387049	dAg1_00012010-RA|dAg1_00038300-RA|dAg1_00022662-RA|dAg1_00040256-RA|dAg1_00043811-RA|dAg1_00029326-RA|dAg1_00005484-RA	CC	Up
vacuole	Gene Ontology	GO:0005773	4	40	0.00113843	0.0147996	dAg1_00038005-RA|dAg1_00005484-RA|dAg1_00034370-RA|dAg1_00043811-RA	CC	Up
plant-type cell wall	Gene Ontology	GO:0009505	4	53	0.00297941	0.0331991	dAg1_00009678-RA|dAg1_00012149-RA|dAg1_00012010-RA|dAg1_00040256-RA	CC	Up
cell wall	Gene Ontology	GO:0005618	2	35	0.0569431	0.220971	dAg1_00038005-RA|dAg1_00027585-RA	CC	Up
apoplast	Gene Ontology	GO:0048046	1	5	0.0610211	0.220971	dAg1_00021996-RA	CC	Up
chloroplast	Gene Ontology	GO:0009507	5	198	0.0624049	0.220971	dAg1_00033397-RA|dAg1_00007812-RA|dAg1_00012264-RA|dAg1_00011472-RA|dAg1_00044724-RA	CC	Up
post-mRNA release spliceosomal complex	Gene Ontology	GO:0071014	1	9	0.099625	0.222021	dAg1_00020752-RA	CC	Up
large ribosomal subunit	Gene Ontology	GO:0015934	1	10	0.109026	0.228296	dAg1_00018277-RA	CC	Up
Prp19 complex	Gene Ontology	GO:0000974	1	10	0.109026	0.228296	dAg1_00020752-RA	CC	Up
ribosome	Gene Ontology	GO:0005840	1	13	0.136646	0.261556	dAg1_00018277-RA	CC	Up
cytoplasm	Gene Ontology	GO:0005737	14	960	0.143385	0.269495	dAg1_00035180-RA|dAg1_00018382-RA|dAg1_00035861-RA|dAg1_00035635-RA|dAg1_00033452-RA|dAg1_00011443-RA|dAg1_00010144-RA|dAg1_00033957-RA|dAg1_00034413-RA|dAg1_00035752-RA|dAg1_00039751-RA|dAg1_00019255-RA|dAg1_00028628-RA|dAg1_00016865-RA	CC	Up
mitochondrial matrix	Gene Ontology	GO:0005759	1	15	0.154584	0.278787	dAg1_00018382-RA	CC	Up
plasma membrane	Gene Ontology	GO:0005886	8	505	0.170286	0.282689	dAg1_00034540-RA|dAg1_00021048-RA|dAg1_00038300-RA|dAg1_00013852-RA|dAg1_00043811-RA|dAg1_00029326-RA|dAg1_00017526-RA|dAg1_00005484-RA	CC	Up
mediator complex	Gene Ontology	GO:0016592	1	20	0.197819	0.306351	dAg1_00025719-RA	CC	Up
actin cytoskeleton	Gene Ontology	GO:0015629	1	24	0.230815	0.327337	dAg1_00035635-RA	CC	Up
plant-type vacuole membrane	Gene Ontology	GO:0009705	1	25	0.23885	0.335681	dAg1_00042569-RA	CC	Up
integral component of endoplasmic reticulum membrane	Gene Ontology	GO:0030176	1	26	0.246801	0.342231	dAg1_00038381-RA	CC	Up
plasma membrane	Gene Ontology	GO:0005886	30	505	3.57417e-09	5.6591e-07	dAg1_00005782-RA|dAg1_00030492-RA|dAg1_00028846-RA|dAg1_00017976-RA|dAg1_00024569-RA|dAg1_00041796-RA|dAg1_00036559-RA|dAg1_00019356-RA|dAg1_00008058-RA|dAg1_00008846-RA|dAg1_00022282-RA|dAg1_00036542-RA|dAg1_00000395-RA|dAg1_00021617-RA|dAg1_00005521-RA|dAg1_00038525-RA|dAg1_00044868-RA|dAg1_00018581-RA|dAg1_00040316-RA|dAg1_00007417-RA|dAg1_00027858-RA|dAg1_00035139-RA|dAg1_00042651-RA|dAg1_000…	CC	Down
integral component of plasma membrane	Gene Ontology	GO:0005887	4	41	0.00568607	0.0964601	dAg1_00024164-RA|dAg1_00005647-RA|dAg1_00012436-RA|dAg1_00027762-RA	CC	Down
perinuclear region of cytoplasm	Gene Ontology	GO:0048471	2	7	0.00848839	0.118588	dAg1_00022307-RA|dAg1_00020757-RA	CC	Down
anchored component of plasma membrane	Gene Ontology	GO:0046658	5	85	0.0146988	0.151781	dAg1_00038784-RA|dAg1_00038783-RA|dAg1_00037919-RA|dAg1_00024778-RA|dAg1_00000289-RA	CC	Down
membrane	Gene Ontology	GO:0016020	11	328	0.0211136	0.20058	dAg1_00036542-RA|dAg1_00016855-RA|dAg1_00001233-RA|dAg1_00005451-RA|dAg1_00018581-RA|dAg1_00042761-RA|dAg1_00022937-RA|dAg1_00040676-RA|dAg1_00036559-RA|dAg1_00041796-RA|dAg1_00016816-RA	CC	Down
plasmodesma	Gene Ontology	GO:0009506	5	109	0.0361778	0.273738	dAg1_00035139-RA|dAg1_00038525-RA|dAg1_00007716-RA|dAg1_00024778-RA|dAg1_00000289-RA	CC	Down
mitochondrion	Gene Ontology	GO:0005739	7	214	0.0650176	0.316821	dAg1_00017325-RA|dAg1_00002078-RA|dAg1_00044501-RA|dAg1_00028464-RA|dAg1_00016775-RA|dAg1_00017326-RA|dAg1_00043165-RA	CC	Down
ubiquitin ligase complex	Gene Ontology	GO:0000151	2	27	0.0777331	0.316821	dAg1_00021388-RA|dAg1_00021604-RA	CC	Down
heterotrimeric G-protein complex	Gene Ontology	GO:0005834	1	5	0.0919815	0.316821	dAg1_00005223-RA	CC	Down
eukaryotic translation initiation factor 2 complex	Gene Ontology	GO:0005850	1	5	0.0919815	0.316821	dAg1_00026728-RA	CC	Down
nuclear pore outer ring	Gene Ontology	GO:0031080	1	5	0.0919815	0.316821	dAg1_00018158-RA	CC	Down
integral component of peroxisomal membrane	Gene Ontology	GO:0005779	1	6	0.106469	0.316821	dAg1_00004076-RA	CC	Down
vacuole	Gene Ontology	GO:0005773	2	40	0.144435	0.337639	dAg1_00036542-RA|dAg1_00036559-RA	CC	Down
ESCRT I complex	Gene Ontology	GO:0000813	1	10	0.162148	0.346938	dAg1_00018555-RA	CC	Down
clathrin vesicle coat	Gene Ontology	GO:0030125	1	10	0.162148	0.346938	dAg1_00005735-RA	CC	Down
extracellular region	Gene Ontology	GO:0005576	2	47	0.183918	0.364004	dAg1_00018007-RA|dAg1_00030981-RA	CC	Down
nucleus	Gene Ontology	GO:0005634	25	1279	0.198809	0.374104	dAg1_00035501-RA|dAg1_00033340-RA|dAg1_00039915-RA|dAg1_00012550-RA|dAg1_00039723-RA|dAg1_00043328-RA|dAg1_00031305-RA|dAg1_00018159-RA|dAg1_00027270-RA|dAg1_00031606-RA|dAg1_00005792-RA|dAg1_00026218-RA|dAg1_00017535-RA|dAg1_00021787-RA|dAg1_00018652-RA|dAg1_00024309-RA|dAg1_00028218-RA|dAg1_00015797-RA|dAg1_00004192-RA|dAg1_00033453-RA|dAg1_00004198-RA|dAg1_00002992-RA|dAg1_00032244-RA|dAg1_000…	CC	Down
COPII-coated ER to Golgi transport vesicle	Gene Ontology	GO:0030134	1	13	0.201622	0.374104	dAg1_00036655-RA	CC	Down
cytoplasm	Gene Ontology	GO:0005737	19	960	0.222113	0.37817	dAg1_00026728-RA|dAg1_00020954-RA|dAg1_00021604-RA|dAg1_00018652-RA|dAg1_00027270-RA|dAg1_00024550-RA|dAg1_00005602-RA|dAg1_00021388-RA|dAg1_00005679-RA|dAg1_00028218-RA|dAg1_00034954-RA|dAg1_00004772-RA|dAg1_00005607-RA|dAg1_00022307-RA|dAg1_00020757-RA|dAg1_00005605-RA|dAg1_00012550-RA|dAg1_00033453-RA|dAg1_00033340-RA	CC	Down
endoplasmic reticulum-Golgi intermediate compartment	Gene Ontology	GO:0005793	1	15	0.226902	0.37817	dAg1_00036655-RA	CC	Down
photosynthesis, light harvesting in photosystem I	Gene Ontology	GO:0009768	12	21	3.98396e-16	4.14332e-14	dAg1_00018773-RA|dAg1_00004711-RA|dAg1_00042909-RA|dAg1_00018383-RA|dAg1_00042908-RA|dAg1_00031838-RA|dAg1_00004715-RA|dAg1_00026022-RA|dAg1_00031836-RA|dAg1_00018380-RA|dAg1_00034464-RA|dAg1_00018381-RA	BP	Up
response to light stimulus	Gene Ontology	GO:0009416	12	47	9.86517e-13	6.15586e-11	dAg1_00018773-RA|dAg1_00004711-RA|dAg1_00042909-RA|dAg1_00018383-RA|dAg1_00042908-RA|dAg1_00031838-RA|dAg1_00004715-RA|dAg1_00026022-RA|dAg1_00031836-RA|dAg1_00018380-RA|dAg1_00034464-RA|dAg1_00018381-RA	BP	Up
response to nitrate	Gene Ontology	GO:0010167	2	6	0.00291761	0.0331991	dAg1_00015277-RA|dAg1_00033717-RA	BP	Up
actin filament bundle assembly	Gene Ontology	GO:0051017	2	13	0.0104261	0.0988725	dAg1_00035180-RA|dAg1_00035635-RA	BP	Up
protein autophosphorylation	Gene Ontology	GO:0046777	4	78	0.0107746	0.0988725	dAg1_00029326-RA|dAg1_00033957-RA|dAg1_00021048-RA|dAg1_00033452-RA	BP	Up
cellular response to oxidative stress	Gene Ontology	GO:0034599	2	22	0.0257697	0.182731	dAg1_00039751-RA|dAg1_00012264-RA	BP	Up
sphingolipid biosynthetic process	Gene Ontology	GO:0030148	1	5	0.0610211	0.220971	dAg1_00038381-RA	BP	Up
ion homeostasis	Gene Ontology	GO:0050801	1	5	0.0610211	0.220971	dAg1_00034540-RA	BP	Up
translation	Gene Ontology	GO:0006412	2	38	0.0653586	0.220971	dAg1_00018277-RA|dAg1_00007812-RA	BP	Up
very long-chain fatty acid biosynthetic process	Gene Ontology	GO:0042761	1	6	0.0708241	0.220971	dAg1_00038381-RA	BP	Up
guard cell differentiation	Gene Ontology	GO:0010052	1	6	0.0708241	0.220971	dAg1_00031192-RA	BP	Up
arabinan catabolic process	Gene Ontology	GO:0031222	1	6	0.0708241	0.220971	dAg1_00012149-RA	BP	Up
xylan catabolic process	Gene Ontology	GO:0045493	1	6	0.0708241	0.220971	dAg1_00012149-RA	BP	Up
regulation of secondary shoot formation	Gene Ontology	GO:2000032	1	7	0.080525	0.222021	dAg1_00025278-RA	BP	Up
multicellular organism development	Gene Ontology	GO:0007275	1	7	0.080525	0.222021	dAg1_00044550-RA	BP	Up
peptidyl-serine phosphorylation	Gene Ontology	GO:0018105	2	46	0.0895941	0.222021	dAg1_00033957-RA|dAg1_00033452-RA	BP	Up
brassinosteroid biosynthetic process	Gene Ontology	GO:0016132	1	8	0.0901249	0.222021	dAg1_00044550-RA	BP	Up
brassinosteroid homeostasis	Gene Ontology	GO:0010268	1	8	0.0901249	0.222021	dAg1_00044550-RA	BP	Up
pectin catabolic process	Gene Ontology	GO:0045490	1	8	0.0901249	0.222021	dAg1_00002763-RA	BP	Up
response to auxin	Gene Ontology	GO:0009733	1	8	0.0901249	0.222021	dAg1_00025753-RA	BP	Up
regulation of salicylic acid biosynthetic process	Gene Ontology	GO:0080142	3	8	0.0006052	0.0245535	dAg1_00021787-RA|dAg1_00043328-RA|dAg1_00004198-RA	BP	Down
defense response to bacterium	Gene Ontology	GO:0042742	4	21	0.000620299	0.0245535	dAg1_00008846-RA|dAg1_00005782-RA|dAg1_00024569-RA|dAg1_00039915-RA	BP	Down
protein stabilization	Gene Ontology	GO:0050821	3	11	0.00128837	0.0437124	dAg1_00022307-RA|dAg1_00033340-RA|dAg1_00020757-RA	BP	Down
glutathione metabolic process	Gene Ontology	GO:0006749	4	37	0.00406252	0.0877648	dAg1_00005607-RA|dAg1_00024550-RA|dAg1_00005605-RA|dAg1_00005602-RA	BP	Down
defense response to oomycetes	Gene Ontology	GO:0002229	3	18	0.00433333	0.0877648	dAg1_00008846-RA|dAg1_00005782-RA|dAg1_00024569-RA	BP	Down
defense response	Gene Ontology	GO:0006952	4	38	0.00443443	0.0877648	dAg1_00018007-RA|dAg1_00008846-RA|dAg1_00005782-RA|dAg1_00024569-RA	BP	Down
phosphate ion transmembrane transport	Gene Ontology	GO:0035435	2	5	0.00505737	0.0923942	dAg1_00035618-RA|dAg1_00035619-RA	BP	Down
proteolysis involved in cellular protein catabolic process	Gene Ontology	GO:0051603	3	25	0.00983003	0.129702	dAg1_00016767-RA|dAg1_00043113-RA|dAg1_00016753-RA	BP	Down
protein autophosphorylation	Gene Ontology	GO:0046777	5	78	0.0106222	0.132777	dAg1_00040316-RA|dAg1_00008058-RA|dAg1_00018652-RA|dAg1_00022282-RA|dAg1_00007716-RA	BP	Down
regulation of transcription, DNA-templated	Gene Ontology	GO:0006355	7	148	0.0124642	0.143606	dAg1_00031305-RA|dAg1_00035501-RA|dAg1_00024309-RA|dAg1_00026218-RA|dAg1_00002992-RA|dAg1_00031606-RA|dAg1_00004192-RA	BP	Down
protein localization	Gene Ontology	GO:0008104	2	9	0.0126978	0.143606	dAg1_00039440-RA|dAg1_00028917-RA	BP	Down
ceramide biosynthetic process	Gene Ontology	GO:0046513	2	11	0.017633	0.174494	dAg1_00021256-RA|dAg1_00005647-RA	BP	Down
defense response to fungus	Gene Ontology	GO:0050832	2	16	0.0328248	0.27354	dAg1_00033340-RA|dAg1_00039915-RA	BP	Down
regulation of jasmonic acid mediated signaling pathway	Gene Ontology	GO:2000022	2	16	0.0328248	0.27354	dAg1_00039723-RA|dAg1_00039915-RA	BP	Down
cellular response to heat	Gene Ontology	GO:0034605	2	17	0.0363063	0.273738	dAg1_00022307-RA|dAg1_00020757-RA	BP	Down
positive regulation of proteasomal ubiquitin-dependent protein catabolic process	Gene Ontology	GO:0032436	2	17	0.0363063	0.273738	dAg1_00021388-RA|dAg1_00021604-RA	BP	Down
exocytosis	Gene Ontology	GO:0006887	2	25	0.0685989	0.316821	dAg1_00031701-RA|dAg1_00000395-RA	BP	Down
ubiquitin-dependent protein catabolic process	Gene Ontology	GO:0006511	4	95	0.074122	0.316821	dAg1_00021388-RA|dAg1_00021604-RA|dAg1_00014390-RA|dAg1_00022826-RA	BP	Down
protein polyubiquitination	Gene Ontology	GO:0000209	3	60	0.0795422	0.316821	dAg1_00021388-RA|dAg1_00021604-RA|dAg1_00022826-RA	BP	Down
spermidine biosynthetic process	Gene Ontology	GO:0008295	1	5	0.0919815	0.316821	dAg1_00000976-RA	BP	Down
water channel activity	Gene Ontology	GO:0015250	4	19	8.82209e-05	0.00172031	dAg1_00027412-RA|dAg1_00005484-RA|dAg1_00034871-RA|dAg1_00043811-RA	MF	Up
nitrate transmembrane transporter activity	Gene Ontology	GO:0015112	3	13	0.000570482	0.00847573	dAg1_00042569-RA|dAg1_00015277-RA|dAg1_00033717-RA	MF	Up
peroxidase activity	Gene Ontology	GO:0004601	3	46	0.014571	0.122869	dAg1_00012010-RA|dAg1_00012264-RA|dAg1_00040256-RA	MF	Up
oxidoreductase activity	Gene Ontology	GO:0016491	5	135	0.0159851	0.124684	dAg1_00044550-RA|dAg1_00042141-RA|dAg1_00028868-RA|dAg1_00029151-RA|dAg1_00010513-RA	MF	Up
DNA-binding transcription factor activity	Gene Ontology	GO:0003700	6	216	0.0296255	0.200938	dAg1_00034477-RA|dAg1_00022760-RA|dAg1_00025278-RA|dAg1_00042107-RA|dAg1_00029398-RA|dAg1_00018706-RA	MF	Up
calcium-dependent protein serine/threonine kinase activity	Gene Ontology	GO:0009931	2	30	0.0438632	0.220971	dAg1_00033957-RA|dAg1_00033452-RA	MF	Up
calmodulin-dependent protein kinase activity	Gene Ontology	GO:0004683	2	30	0.0438632	0.220971	dAg1_00033957-RA|dAg1_00033452-RA	MF	Up
calmodulin binding	Gene Ontology	GO:0005516	2	32	0.0489455	0.220971	dAg1_00033957-RA|dAg1_00033452-RA	MF	Up
protein binding	Gene Ontology	GO:0005515	1	5	0.0610211	0.220971	dAg1_00028628-RA	MF	Up
ATP-dependent microtubule motor activity, plus-end-directed	Gene Ontology	GO:0008574	1	5	0.0610211	0.220971	dAg1_00034925-RA	MF	Up
calcium activated cation channel activity	Gene Ontology	GO:0005227	1	5	0.0610211	0.220971	dAg1_00017526-RA	MF	Up
actin filament binding	Gene Ontology	GO:0051015	2	38	0.0653586	0.220971	dAg1_00035180-RA|dAg1_00035635-RA	MF	Up
pectinesterase activity	Gene Ontology	GO:0030599	2	39	0.0682508	0.220971	dAg1_00031926-RA|dAg1_00002763-RA	MF	Up
pyruvate kinase activity	Gene Ontology	GO:0004743	1	6	0.0708241	0.220971	dAg1_00035861-RA	MF	Up
nucleoside diphosphate kinase activity	Gene Ontology	GO:0004550	1	6	0.0708241	0.220971	dAg1_00034586-RA	MF	Up
glucose-6-phosphate 1-epimerase activity	Gene Ontology	GO:0047938	1	6	0.0708241	0.220971	dAg1_00019255-RA	MF	Up
alpha-L-arabinofuranosidase activity	Gene Ontology	GO:0046556	1	6	0.0708241	0.220971	dAg1_00012149-RA	MF	Up
hydrolase activity, hydrolyzing O-glycosyl compounds	Gene Ontology	GO:0004553	1	6	0.0708241	0.220971	dAg1_00012149-RA	MF	Up
phospholipid binding	Gene Ontology	GO:0005543	1	6	0.0708241	0.220971	dAg1_00038979-RA	MF	Up
thioredoxin peroxidase activity	Gene Ontology	GO:0008379	1	6	0.0708241	0.220971	dAg1_00039751-RA	MF	Up
DNA-binding transcription factor activity	Gene Ontology	GO:0003700	13	216	8.84687e-05	0.00700377	dAg1_00031305-RA|dAg1_00021787-RA|dAg1_00035501-RA|dAg1_00024309-RA|dAg1_00026218-RA|dAg1_00004198-RA|dAg1_00043328-RA|dAg1_00002992-RA|dAg1_00015797-RA|dAg1_00031606-RA|dAg1_00004192-RA|dAg1_00003676-RA|dAg1_00018159-RA	MF	Down
sequence-specific DNA binding	Gene Ontology	GO:0043565	12	202	0.000183543	0.0108978	dAg1_00031305-RA|dAg1_00021787-RA|dAg1_00035501-RA|dAg1_00024309-RA|dAg1_00026218-RA|dAg1_00004198-RA|dAg1_00043328-RA|dAg1_00018159-RA|dAg1_00015797-RA|dAg1_00031606-RA|dAg1_00004192-RA|dAg1_00003676-RA	MF	Down
cysteine-type endopeptidase activity	Gene Ontology	GO:0004197	4	36	0.00371228	0.0877648	dAg1_00016767-RA|dAg1_00019629-RA|dAg1_00043113-RA|dAg1_00016753-RA	MF	Down
transmembrane receptor protein serine/threonine kinase activity	Gene Ontology	GO:0004675	3	18	0.00433333	0.0877648	dAg1_00008846-RA|dAg1_00005782-RA|dAg1_00024569-RA	MF	Down
glutathione transferase activity	Gene Ontology	GO:0004364	4	42	0.00615049	0.0973828	dAg1_00005607-RA|dAg1_00024550-RA|dAg1_00005605-RA|dAg1_00005602-RA	MF	Down
NAD(P)H oxidase H2O2-forming activity	Gene Ontology	GO:0016174	2	7	0.00848839	0.118588	dAg1_00021633-RA|dAg1_00021617-RA	MF	Down
calcium ion binding	Gene Ontology	GO:0005509	4	54	0.0137783	0.148743	dAg1_00011071-RA|dAg1_00021389-RA|dAg1_00020197-RA|dAg1_00021734-RA	MF	Down
ubiquitin protein ligase activity	Gene Ontology	GO:0061630	5	101	0.0276392	0.24771	dAg1_00021388-RA|dAg1_00017139-RA|dAg1_00021604-RA|dAg1_00009441-RA|dAg1_00014390-RA	MF	Down
ubiquitin conjugating enzyme binding	Gene Ontology	GO:0031624	2	21	0.0515308	0.316821	dAg1_00021388-RA|dAg1_00021604-RA	MF	Down
protein serine/threonine phosphatase activity	Gene Ontology	GO:0004722	2	23	0.0598531	0.316821	dAg1_00033453-RA|dAg1_00031376-RA	MF	Down
phosphatase activity	Gene Ontology	GO:0016791	2	24	0.0641753	0.316821	dAg1_00040676-RA|dAg1_00004036-RA	MF	Down
antiporter activity	Gene Ontology	GO:0015297	2	26	0.0731196	0.316821	dAg1_00035618-RA|dAg1_00035619-RA	MF	Down
microtubule minus-end binding	Gene Ontology	GO:0051011	1	5	0.0919815	0.316821	dAg1_00012708-RA	MF	Down
malate dehydrogenase (decarboxylating) (NADP+) activity	Gene Ontology	GO:0004473	1	5	0.0919815	0.316821	dAg1_00030980-RA	MF	Down
malic enzyme activity	Gene Ontology	GO:0004470	1	5	0.0919815	0.316821	dAg1_00030980-RA	MF	Down
L-glutamate transmembrane transporter activity	Gene Ontology	GO:0005313	1	5	0.0919815	0.316821	dAg1_00042823-RA	MF	Down
G protein-coupled receptor binding	Gene Ontology	GO:0001664	1	5	0.0919815	0.316821	dAg1_00005223-RA	MF	Down
protein binding	Gene Ontology	GO:0005515	1	5	0.0919815	0.316821	dAg1_00020197-RA	MF	Down
ammonium transmembrane transporter activity	Gene Ontology	GO:0008519	1	5	0.0919815	0.316821	dAg1_00024164-RA	MF	Down
G-protein beta/gamma-subunit complex binding	Gene Ontology	GO:0031683	1	5	0.0919815	0.316821	dAg1_00005223-RA	MF	Down
KEGG term	Database	KEGG ID	Input number	Background number	P-Value	Corrected P-Value	Input	Hyperlink	Direction
Photosynthesis - antenna proteins	KEGG PATHWAY	sot00196	21	34	7.8495e-28	2.44904e-25	dAg1_00018773-RA|dAg1_00018379-RA|dAg1_00004711-RA|dAg1_00018378-RA|dAg1_00018375-RA|dAg1_00018374-RA|dAg1_00042909-RA|dAg1_00018383-RA|dAg1_00004715-RA|dAg1_00042908-RA|dAg1_00031838-RA|dAg1_00042906-RA|dAg1_00042889-RA|dAg1_00021387-RA|dAg1_00026022-RA|dAg1_00018376-RA|dAg1_00042910-RA|dAg1_00031836-RA|dAg1_00018380-RA|dAg1_00034464-RA|dAg1_00018381-RA	http://www.genome.jp/kegg-bin/show_pathway?sot00196/sot:102589532%09red/sot:102605549%09red/sot:102604990%09red/sot:102596765%09red/sot:102587257%09red/sot:102606321%09red/sot:102593779%09red/sot:102586581%09red/sot:102586836%09red/sot:102596966%09red/sot:102586241%09red/sot:102598575%09red/sot:102597090%09red/sot:102594652%09red/sot:102604320%09red/sot:102586172%09red/sot:102583646%09red	Up
Metabolic pathways	KEGG PATHWAY	sot01100	68	2593	3.68444e-12	1.91591e-10	dAg1_00031926-RA|dAg1_00012010-RA|dAg1_00039998-RA|dAg1_00021393-RA|dAg1_00002763-RA|dAg1_00018378-RA|dAg1_00018383-RA|dAg1_00038979-RA|dAg1_00044168-RA|dAg1_00038381-RA|dAg1_00018773-RA|dAg1_00028969-RA|dAg1_00040474-RA|dAg1_00018380-RA|dAg1_00034464-RA|dAg1_00044069-RA|dAg1_00031838-RA|dAg1_00044770-RA|dAg1_00035010-RA|dAg1_00003050-RA|dAg1_00035243-RA|dAg1_00012264-RA|dAg1_00010144-RA|dAg1_000…	http://www.genome.jp/kegg-bin/show_pathway?sot01100/sot:102603391%09red/sot:102589532%09red/sot:102577669%09red/sot:102596966%09red/sot:102604990%09red/sot:102596765%09red/sot:102587222%09red/sot:102600375%09red/sot:102585990%09red/sot:102603315%09red/sot:102585620%09red/sot:102585566%09red/sot:102595504%09red/sot:102604120%09red/sot:102598575%09red/sot:102579876%09red/sot:102582462%09red/sot:102…	Up
Porphyrin and chlorophyll metabolism	KEGG PATHWAY	sot00860	6	51	2.86396e-05	0.00068735	dAg1_00021393-RA|dAg1_00012445-RA|dAg1_00040474-RA|dAg1_00036665-RA|dAg1_00033706-RA|dAg1_00022456-RA	http://www.genome.jp/kegg-bin/show_pathway?sot00860/sot:102594460%09red/sot:102592765%09red/sot:102594293%09red/sot:102598599%09red/sot:102599631%09red/sot:102596523%09red	Up
Biosynthesis of secondary metabolites	KEGG PATHWAY	sot01110	31	1337	4.87466e-05	0.00108635	dAg1_00012010-RA|dAg1_00003194-RA|dAg1_00021393-RA|dAg1_00044168-RA|dAg1_00040161-RA|dAg1_00038381-RA|dAg1_00040474-RA|dAg1_00035010-RA|dAg1_00003050-RA|dAg1_00038979-RA|dAg1_00040929-RA|dAg1_00015958-RA|dAg1_00028969-RA|dAg1_00036665-RA|dAg1_00039998-RA|dAg1_00035861-RA|dAg1_00028628-RA|dAg1_00044550-RA|dAg1_00022557-RA|dAg1_00034077-RA|dAg1_00012445-RA|dAg1_00034776-RA|dAg1_00005249-RA|dAg1_000…	http://www.genome.jp/kegg-bin/show_pathway?sot01110/sot:102603391%09red/sot:102577887%09red/sot:102582462%09red/sot:102587222%09red/sot:102585990%09red/sot:102599631%09red/sot:102596523%09red/sot:102577863%09red/sot:102591486%09red/sot:102583349%09red/sot:102598599%09red/sot:102577558%09red/sot:102581076%09red/sot:102604120%09red/sot:102604517%09red/sot:102579007%09red/sot:102602430%09red/sot:102…	Up
Cyanoamino acid metabolism	KEGG PATHWAY	sot00460	5	53	0.000349995	0.00574728	dAg1_00040929-RA|dAg1_00044168-RA|dAg1_00003050-RA|dAg1_00034774-RA|dAg1_00034776-RA	http://www.genome.jp/kegg-bin/show_pathway?sot00460/sot:102587222%09red/sot:102602430%09red/sot:102591486%09red/sot:102586545%09red/sot:102604517%09red	Up
Pentose and glucuronate interconversions	KEGG PATHWAY	sot00040	7	136	0.000788477	0.011182	dAg1_00008764-RA|dAg1_00029908-RA|dAg1_00031926-RA|dAg1_00037100-RA|dAg1_00002763-RA|dAg1_00041030-RA|dAg1_00041031-RA	http://www.genome.jp/kegg-bin/show_pathway?sot00040/sot:102577669%09red/sot:102598232%09red/sot:102595504%09red/sot:102605687%09red/sot:102591905%09red/sot:102588169%09red	Up
Plant hormone signal transduction	KEGG PATHWAY	sot04075	10	331	0.00331952	0.0357134	dAg1_00035536-RA|dAg1_00005391-RA|dAg1_00034987-RA|dAg1_00004303-RA|dAg1_00032054-RA|dAg1_00022760-RA|dAg1_00005412-RA|dAg1_00035433-RA|dAg1_00043343-RA|dAg1_00007886-RA	http://www.genome.jp/kegg-bin/show_pathway?sot04075/sot:102585730%09red/sot:102578779%09red/sot:102597494%09red/sot:102587488%09red/sot:102595865%09red/sot:102601835%09red/sot:102587893%09red/sot:102604891%09red/sot:102579156%09red/sot:102600864%09red	Up
Fatty acid elongation	KEGG PATHWAY	sot00062	3	40	0.0102165	0.0988725	dAg1_00028969-RA|dAg1_00038381-RA|dAg1_00032544-RA	http://www.genome.jp/kegg-bin/show_pathway?sot00062/sot:102579720%09red/sot:102593970%09red/sot:102586361%09red	Up
Glyoxylate and dicarboxylate metabolism	KEGG PATHWAY	sot00630	4	82	0.0126668	0.112916	dAg1_00022557-RA|dAg1_00010144-RA|dAg1_00044168-RA|dAg1_00044069-RA	http://www.genome.jp/kegg-bin/show_pathway?sot00630/sot:102595103%09red/sot:102601229%09red/sot:102604120%09red/sot:102591486%09red	Up
Photosynthesis	KEGG PATHWAY	sot00195	4	87	0.0153141	0.124684	dAg1_00035158-RA|dAg1_00021291-RA|dAg1_00035243-RA|dAg1_00042723-RA	http://www.genome.jp/kegg-bin/show_pathway?sot00195/sot:102585620%09red/sot:102585358%09red/sot:102579876%09red	Up
Phenylpropanoid biosynthesis	KEGG PATHWAY	sot00940	7	250	0.0188602	0.143521	dAg1_00012010-RA|dAg1_00035010-RA|dAg1_00003050-RA|dAg1_00034774-RA|dAg1_00040256-RA|dAg1_00040929-RA|dAg1_00034776-RA	http://www.genome.jp/kegg-bin/show_pathway?sot00940/sot:102604517%09red/sot:102587222%09red/sot:102585990%09red/sot:102602430%09red/sot:102586545%09red/sot:102581076%09red/sot:102580868%09red	Up
Starch and sucrose metabolism	KEGG PATHWAY	sot00500	5	152	0.0248203	0.182731	dAg1_00040929-RA|dAg1_00003050-RA|dAg1_00028628-RA|dAg1_00034774-RA|dAg1_00034776-RA	http://www.genome.jp/kegg-bin/show_pathway?sot00500/sot:102603391%09red/sot:102602430%09red/sot:102604517%09red/sot:102587222%09red/sot:102586545%09red	Up
Biosynthesis of amino acids	KEGG PATHWAY	sot01230	6	250	0.0528141	0.220971	dAg1_00035861-RA|dAg1_00010144-RA|dAg1_00044168-RA|dAg1_00034077-RA|dAg1_00035666-RA|dAg1_00015958-RA	http://www.genome.jp/kegg-bin/show_pathway?sot01230/sot:102577887%09red/sot:102582462%09red/sot:102605445%09red/sot:102595103%09red/sot:102591486%09red/sot:102577558%09red	Up
Nitrogen metabolism	KEGG PATHWAY	sot00910	2	38	0.0653586	0.220971	dAg1_00044770-RA|dAg1_00010144-RA	http://www.genome.jp/kegg-bin/show_pathway?sot00910/sot:102595103%09red/sot:102591490%09red	Up
MAPK signaling pathway - plant	KEGG PATHWAY	sot04016	5	213	0.0791768	0.222021	dAg1_00022760-RA|dAg1_00042903-RA|dAg1_00034987-RA|dAg1_00034586-RA|dAg1_00013852-RA	http://www.genome.jp/kegg-bin/show_pathway?sot04016/sot:102593454%09red/sot:102604726%09red/sot:102595907%09red/sot:102597494%09red/sot:102601835%09red	Up
Carbon metabolism	KEGG PATHWAY	sot01200	6	295	0.0968169	0.222021	dAg1_00039998-RA|dAg1_00035861-RA|dAg1_00022557-RA|dAg1_00044168-RA|dAg1_00015958-RA|dAg1_00044069-RA	http://www.genome.jp/kegg-bin/show_pathway?sot01200/sot:102582462%09red/sot:102601229%09red/sot:102604120%09red/sot:102591486%09red/sot:102594145%09red/sot:102577558%09red	Up
Glycosphingolipid biosynthesis - globo and isoglobo series	KEGG PATHWAY	sot00603	1	9	0.099625	0.222021	dAg1_00009678-RA	http://www.genome.jp/kegg-bin/show_pathway?sot00603/sot:102601663%09red	Up
Monobactam biosynthesis	KEGG PATHWAY	sot00261	1	9	0.099625	0.222021	dAg1_00034077-RA	http://www.genome.jp/kegg-bin/show_pathway?sot00261/sot:102605445%09red	Up
Lysine biosynthesis	KEGG PATHWAY	sot00300	1	10	0.109026	0.228296	dAg1_00034077-RA	http://www.genome.jp/kegg-bin/show_pathway?sot00300/sot:102605445%09red	Up
alpha-Linolenic acid metabolism	KEGG PATHWAY	sot00592	2	58	0.129842	0.256396	dAg1_00038979-RA|dAg1_00040161-RA	http://www.genome.jp/kegg-bin/show_pathway?sot00592/sot:102583349%09red/sot:102577863%09red	Up
Plant-pathogen interaction	KEGG PATHWAY	sot04626	24	224	2.35666e-12	1.11941e-09	dAg1_00004705-RA|dAg1_00040099-RA|dAg1_00033340-RA|dAg1_00035213-RA|dAg1_00007417-RA|dAg1_00032316-RA|dAg1_00021617-RA|dAg1_00043113-RA|dAg1_00031014-RA|dAg1_00018647-RA|dAg1_00020197-RA|dAg1_00042833-RA|dAg1_00004704-RA|dAg1_00018652-RA|dAg1_00042902-RA|dAg1_00004946-RA|dAg1_00021633-RA|dAg1_00033822-RA|dAg1_00006580-RA|dAg1_00021734-RA|dAg1_00022307-RA|dAg1_00020757-RA|dAg1_00034513-RA|dAg1_000…	http://www.genome.jp/kegg-bin/show_pathway?sot04626/sot:102587398%09red/sot:102588093%09red/sot:102577666%09red/sot:102603937%09red/sot:102600521%09red/sot:102595400%09red/sot:102603244%09red/sot:102599328%09red/sot:102589350%09red/sot:102593118%09red/sot:102597433%09red/sot:102579484%09red/sot:102597661%09red/sot:102595106%09red/sot:102604977%09red/sot:102577688%09red/sot:102594754%09red/sot:102…	Down
MAPK signaling pathway - plant	KEGG PATHWAY	sot04016	16	213	9.87068e-07	0.000117214	dAg1_00004705-RA|dAg1_00020197-RA|dAg1_00021617-RA|dAg1_00010146-RA|dAg1_00042902-RA|dAg1_00006580-RA|dAg1_00025731-RA|dAg1_00032498-RA|dAg1_00033822-RA|dAg1_00004704-RA|dAg1_00044428-RA|dAg1_00021633-RA|dAg1_00041981-RA|dAg1_00027812-RA|dAg1_00004946-RA|dAg1_00032316-RA	http://www.genome.jp/kegg-bin/show_pathway?sot04016/sot:102588093%09red/sot:102598760%09red/sot:102585585%09red/sot:102577688%09red/sot:102595429%09red/sot:102590998%09red/sot:102598898%09red/sot:102593817%09red/sot:102577507%09red/sot:102592497%09red/sot:102595106%09red/sot:102580461%09red/sot:102589350%09red/sot:102593118%09red	Down
Plant hormone signal transduction	KEGG PATHWAY	sot04075	11	331	0.0223479	0.208143	dAg1_00004705-RA|dAg1_00004704-RA|dAg1_00010146-RA|dAg1_00024309-RA|dAg1_00039915-RA|dAg1_00039723-RA|dAg1_00024896-RA|dAg1_00044428-RA|dAg1_00027812-RA|dAg1_00004946-RA|dAg1_00020536-RA	http://www.genome.jp/kegg-bin/show_pathway?sot04075/sot:107060673%09red/sot:102604625%09red/sot:102595429%09red/sot:102605309%09red/sot:102592497%09red/sot:102592910%09red/sot:102580461%09red/sot:102589350%09red/sot:102595106%09red/sot:102601928%09red	Down
Glutathione metabolism	KEGG PATHWAY	sot00480	5	119	0.0489089	0.316821	dAg1_00005607-RA|dAg1_00009144-RA|dAg1_00024550-RA|dAg1_00005605-RA|dAg1_00005602-RA	http://www.genome.jp/kegg-bin/show_pathway?sot00480/sot:102599054%09red/sot:102600687%09red/sot:102600033%09red/sot:102597505%09red/sot:102587200%09red	Down
Endocytosis	KEGG PATHWAY	sot04144	7	203	0.0522628	0.316821	dAg1_00012068-RA|dAg1_00034954-RA|dAg1_00028917-RA|dAg1_00017976-RA|dAg1_00039440-RA|dAg1_00018555-RA|dAg1_00024465-RA	http://www.genome.jp/kegg-bin/show_pathway?sot04144/sot:102592415%09red/sot:102604562%09red/sot:102592347%09red/sot:102591419%09red/sot:102593614%09red/sot:102599934%09red/sot:102600860%09red	Down
Mismatch repair	KEGG PATHWAY	sot03430	3	54	0.0627555	0.316821	dAg1_00043245-RA|dAg1_00025600-RA|dAg1_00029857-RA	http://www.genome.jp/kegg-bin/show_pathway?sot03430/sot:107062044%09red/sot:102596642%09red/sot:107063238%09red	Down
Arginine and proline metabolism	KEGG PATHWAY	sot00330	3	68	0.104573	0.316821	dAg1_00044502-RA|dAg1_00000976-RA|dAg1_00044501-RA	http://www.genome.jp/kegg-bin/show_pathway?sot00330/sot:102595539%09red/sot:102588395%09red/sot:102588726%09red	Down
Limonene and pinene degradation	KEGG PATHWAY	sot00903	1	10	0.162148	0.346938	dAg1_00002144-RA	http://www.genome.jp/kegg-bin/show_pathway?sot00903/sot:102592794%09red	Down
Amino sugar and nucleotide sugar metabolism	KEGG PATHWAY	sot00520	4	145	0.215079	0.37817	dAg1_00025511-RA|dAg1_00042749-RA|dAg1_00041981-RA|dAg1_00030981-RA	http://www.genome.jp/kegg-bin/show_pathway?sot00520/sot:102590998%09red/sot:102580604%09red/sot:102582872%09red/sot:102581884%09red	Down
Brassinosteroid biosynthesis	KEGG PATHWAY	sot00905	1	16	0.239241	0.394581	dAg1_00022135-RA	http://www.genome.jp/kegg-bin/show_pathway?sot00905/sot:102597167%09red	Down
alpha-Linolenic acid metabolism	KEGG PATHWAY	sot00592	2	58	0.248312	0.402043	dAg1_00007436-RA|dAg1_00022134-RA	http://www.genome.jp/kegg-bin/show_pathway?sot00592/sot:102597498%09red/sot:102582629%09red	Down
Riboflavin metabolism	KEGG PATHWAY	sot00740	1	18	0.263331	0.403491	dAg1_00004772-RA	http://www.genome.jp/kegg-bin/show_pathway?sot00740/sot:102600595%09red	Down
Pentose phosphate pathway	KEGG PATHWAY	sot00030	2	61	0.266071	0.4058	dAg1_00039935-RA|dAg1_00009144-RA	http://www.genome.jp/kegg-bin/show_pathway?sot00030/sot:102581128%09red/sot:102597505%09red	Down
Glycerophospholipid metabolism	KEGG PATHWAY	sot00564	3	110	0.269527	0.4058	dAg1_00016900-RA|dAg1_00040676-RA|dAg1_00017976-RA	http://www.genome.jp/kegg-bin/show_pathway?sot00564/sot:102593417%09red/sot:102588361%09red/sot:102600860%09red	Down
Biosynthesis of secondary metabolites - unclassified	KEGG PATHWAY	sot00999	1	19	0.27509	0.4058	dAg1_00020430-RA	http://www.genome.jp/kegg-bin/show_pathway?sot00999/sot:102581073%09red	Down
Biotin metabolism	KEGG PATHWAY	sot00780	1	19	0.27509	0.4058	dAg1_00022113-RA	http://www.genome.jp/kegg-bin/show_pathway?sot00780/sot:102602451%09red	Down
DNA replication	KEGG PATHWAY	sot03030	2	63	0.277912	0.408694	dAg1_00025600-RA|dAg1_00029857-RA	http://www.genome.jp/kegg-bin/show_pathway?sot03030/sot:107062044%09red/sot:107063238%09red	Down
Phenylalanine metabolism	KEGG PATHWAY	sot00360	2	64	0.283828	0.415134	dAg1_00017905-RA|dAg1_00002144-RA	http://www.genome.jp/kegg-bin/show_pathway?sot00360/sot:102592794%09red/sot:102591556%09red	Down
Nicotinate and nicotinamide metabolism	KEGG PATHWAY	sot00760	1	21	0.298047	0.422604	dAg1_00000623-RA	http://www.genome.jp/kegg-bin/show_pathway?sot00760/sot:102584378%09red	Down
beta-Alanine metabolism	KEGG PATHWAY	sot00410	2	71	0.325039	0.448819	dAg1_00017905-RA|dAg1_00002144-RA	http://www.genome.jp/kegg-bin/show_pathway?sot00410/sot:102592794%09red/sot:102591556%09red	Down

## Sheet: TableS6
Table S6. Results of Gene Ontology (GO) and KEGG pathway enrichment analysis for differentially expressed genes in Cayuga.
GO term	Database	GO ID	Input number	Background number	P_Value	Corrected.P.Value	Input	Category	Direction
endopeptidase Clp complex	Gene Ontology	GO:0009368	1	9	0.0122144	0.0450316	dAg1_00044135-RA	CC	Up
vacuole	Gene Ontology	GO:0005773	1	40	0.0491629	0.0790882	dAg1_00036542-RA	CC	Up
plasma membrane	Gene Ontology	GO:0005886	2	505	0.128262	0.163645	dAg1_00036542-RA|dAg1_00020959-RA	CC	Up
membrane	Gene Ontology	GO:0016020	1	328	0.333975	0.374456	dAg1_00036542-RA	CC	Up
cytosol	Gene Ontology	GO:0005829	1	426	0.410415	0.433867	dAg1_00014472-RA	CC	Up
integral component of plasma membrane	Gene Ontology	GO:0005887	1	41	0.0347243	0.0952321	dAg1_00007846-RA	CC	Down
cytoplasm	Gene Ontology	GO:0005737	1	960	0.559975	0.589447	dAg1_00011443-RA	CC	Down
nucleus	Gene Ontology	GO:0005634	1	1279	0.666882	0.666882	dAg1_00021178-RA	CC	Down
glutamate catabolic process	Gene Ontology	GO:0006538	1	7	0.00978318	0.0450316	dAg1_00014472-RA	BP	Up
protein quality control for misfolded or incompletely synthesized proteins	Gene Ontology	GO:0006515	1	10	0.0134278	0.0450316	dAg1_00044135-RA	BP	Up
autophagosome assembly	Gene Ontology	GO:0000045	1	11	0.0146398	0.0450316	dAg1_00020956-RA	BP	Up
protein autophosphorylation	Gene Ontology	GO:0046777	1	78	0.092622	0.126927	dAg1_00020959-RA	BP	Up
regulation of salicylic acid biosynthetic process	Gene Ontology	GO:0080142	1	8	0.00754057	0.0368352	dAg1_00021178-RA	BP	Down
ATPase binding	Gene Ontology	GO:0051117	1	12	0.0158503	0.0450316	dAg1_00044135-RA	MF	Up
ATP-dependent peptidase activity	Gene Ontology	GO:0004176	1	13	0.0170593	0.0450316	dAg1_00044135-RA	MF	Up
receptor serine/threonine kinase binding	Gene Ontology	GO:0033612	1	15	0.0194731	0.0450316	dAg1_00018442-RA	MF	Up
serine-type endopeptidase activity	Gene Ontology	GO:0004252	1	18	0.023083	0.0474484	dAg1_00044135-RA	MF	Up
protein serine/threonine kinase activity	Gene Ontology	GO:0004674	1	130	0.148971	0.177804	dAg1_00020959-RA	MF	Up
ammonia-lyase activity	Gene Ontology	GO:0016841	1	5	0.00503314	0.0335543	dAg1_00006177-RA	MF	Down
oxidoreductase activity, acting on the CH-OH group of donors, NAD or NADP as acceptor	Gene Ontology	GO:0016616	1	33	0.0282008	0.0940027	dAg1_00033807-RA	MF	Down
oxidoreductase activity	Gene Ontology	GO:0016491	1	135	0.108289	0.154699	dAg1_00033807-RA	MF	Down
sequence-specific DNA binding	Gene Ontology	GO:0043565	1	202	0.157401	0.196858	dAg1_00021178-RA	MF	Down
DNA-binding transcription factor activity	Gene Ontology	GO:0003700	1	216	0.167329	0.196858	dAg1_00021178-RA	MF	Down
KEGG term	Database	KEGG ID	Input number	Background number	P-Value	Corrected P-Value	Input	Hyperlink	Direction
Plant-pathogen interaction	KEGG PATHWAY	sot04626	3	224	0.00271952	0.0450316	dAg1_00033139-RA|dAg1_00020634-RA|dAg1_00018442-RA	http://www.genome.jp/kegg-bin/show_pathway?sot04626/sot:102581898%09red/sot:102583090%09red/sot:102583296%09red	Up
Taurine and hypotaurine metabolism	KEGG PATHWAY	sot00430	1	15	0.0194731	0.0450316	dAg1_00014472-RA	http://www.genome.jp/kegg-bin/show_pathway?sot00430/sot:102578660%09red	Up
MAPK signaling pathway - plant	KEGG PATHWAY	sot04016	2	213	0.028672	0.0558349	dAg1_00033139-RA|dAg1_00018442-RA	http://www.genome.jp/kegg-bin/show_pathway?sot04016/sot:102581898%09red/sot:102583296%09red	Up
Butanoate metabolism	KEGG PATHWAY	sot00650	1	31	0.0385769	0.0713672	dAg1_00014472-RA	http://www.genome.jp/kegg-bin/show_pathway?sot00650/sot:102578660%09red	Up
Autophagy - other	KEGG PATHWAY	sot04136	1	38	0.0468203	0.0790882	dAg1_00020956-RA	http://www.genome.jp/kegg-bin/show_pathway?sot04136/sot:102600593%09red	Up
Alanine, aspartate and glutamate metabolism	KEGG PATHWAY	sot00250	1	56	0.0677031	0.104376	dAg1_00014472-RA	http://www.genome.jp/kegg-bin/show_pathway?sot00250/sot:102578660%09red	Up
beta-Alanine metabolism	KEGG PATHWAY	sot00410	1	71	0.0847645	0.125451	dAg1_00014472-RA	http://www.genome.jp/kegg-bin/show_pathway?sot00410/sot:102578660%09red	Up
Biosynthesis of secondary metabolites	KEGG PATHWAY	sot01110	1	1337	0.813758	0.836362	dAg1_00014472-RA	http://www.genome.jp/kegg-bin/show_pathway?sot01110/sot:102578660%09red	Up
Metabolic pathways	KEGG PATHWAY	sot01100	1	2593	0.964173	0.964173	dAg1_00014472-RA	http://www.genome.jp/kegg-bin/show_pathway?sot01100/sot:102578660%09red	Up
Biosynthesis of secondary metabolites - unclassified	KEGG PATHWAY	sot00999	2	19	0.000141274	0.00565096	dAg1_00021605-RA|dAg1_00044324-RA	http://www.genome.jp/kegg-bin/show_pathway?sot00999/sot:102586332%09red/sot:102596056%09red	Down
Phenylpropanoid biosynthesis	KEGG PATHWAY	sot00940	3	250	0.00122322	0.0244644	dAg1_00021605-RA|dAg1_00044324-RA|dAg1_00006177-RA	http://www.genome.jp/kegg-bin/show_pathway?sot00940/sot:102596343%09red/sot:102586332%09red/sot:102596056%09red	Down
Metabolic pathways	KEGG PATHWAY	sot01100	7	2593	0.00463339	0.0335543	dAg1_00021605-RA|dAg1_00015780-RA|dAg1_00011443-RA|dAg1_00012243-RA|dAg1_00044324-RA|dAg1_00006177-RA|dAg1_00012994-RA	http://www.genome.jp/kegg-bin/show_pathway?sot01100/sot:102598817%09red/sot:102596343%09red/sot:102586332%09red/sot:102577618%09red/sot:102577619%09red/sot:102577485%09red/sot:102596056%09red	Down
Biosynthesis of secondary metabolites	KEGG PATHWAY	sot01110	5	1337	0.00468614	0.0335543	dAg1_00021605-RA|dAg1_00015780-RA|dAg1_00006177-RA|dAg1_00012243-RA|dAg1_00044324-RA	http://www.genome.jp/kegg-bin/show_pathway?sot01110/sot:102586332%09red/sot:102596343%09red/sot:102577619%09red/sot:102577618%09red/sot:102596056%09red	Down
Stilbenoid, diarylheptanoid and gingerol biosynthesis	KEGG PATHWAY	sot00945	1	45	0.0379702	0.0952321	dAg1_00044324-RA	http://www.genome.jp/kegg-bin/show_pathway?sot00945/sot:102586332%09red	Down
Ubiquinone and other terpenoid-quinone biosynthesis	KEGG PATHWAY	sot00130	1	48	0.0403978	0.0952321	dAg1_00021605-RA	http://www.genome.jp/kegg-bin/show_pathway?sot00130/sot:102596056%09red	Down
Circadian rhythm - plant	KEGG PATHWAY	sot04712	1	52	0.0436254	0.0952321	dAg1_00022228-RA	http://www.genome.jp/kegg-bin/show_pathway?sot04712/sot:102601616%09red	Down
Phenylalanine, tyrosine and tryptophan biosynthesis	KEGG PATHWAY	sot00400	1	52	0.0436254	0.0952321	dAg1_00012243-RA	http://www.genome.jp/kegg-bin/show_pathway?sot00400/sot:102577618%09red	Down
Mismatch repair	KEGG PATHWAY	sot03430	1	54	0.0452353	0.0952321	dAg1_00025600-RA	http://www.genome.jp/kegg-bin/show_pathway?sot03430/sot:107063238%09red	Down
DNA replication	KEGG PATHWAY	sot03030	1	63	0.0524475	0.0968102	dAg1_00025600-RA	http://www.genome.jp/kegg-bin/show_pathway?sot03030/sot:107063238%09red	Down
Flavonoid biosynthesis	KEGG PATHWAY	sot00941	1	63	0.0524475	0.0968102	dAg1_00044324-RA	http://www.genome.jp/kegg-bin/show_pathway?sot00941/sot:102586332%09red	Down
Phenylalanine metabolism	KEGG PATHWAY	sot00360	1	64	0.0532456	0.0968102	dAg1_00006177-RA	http://www.genome.jp/kegg-bin/show_pathway?sot00360/sot:102596343%09red	Down
Inositol phosphate metabolism	KEGG PATHWAY	sot00562	1	74	0.0611914	0.104224	dAg1_00011443-RA	http://www.genome.jp/kegg-bin/show_pathway?sot00562/sot:102598817%09red	Down
Nucleotide excision repair	KEGG PATHWAY	sot03420	1	78	0.0643517	0.104224	dAg1_00025600-RA	http://www.genome.jp/kegg-bin/show_pathway?sot03420/sot:107063238%09red	Down
Homologous recombination	KEGG PATHWAY	sot03440	1	79	0.0651401	0.104224	dAg1_00025600-RA	http://www.genome.jp/kegg-bin/show_pathway?sot03440/sot:107063238%09red	Down
Cysteine and methionine metabolism	KEGG PATHWAY	sot00270	1	127	0.102245	0.154699	dAg1_00015780-RA	http://www.genome.jp/kegg-bin/show_pathway?sot00270/sot:102577619%09red	Down
Starch and sucrose metabolism	KEGG PATHWAY	sot00500	1	152	0.121005	0.166903	dAg1_00012994-RA	http://www.genome.jp/kegg-bin/show_pathway?sot00500/sot:102577485%09red	Down
MAPK signaling pathway - plant	KEGG PATHWAY	sot04016	1	213	0.165211	0.196858	dAg1_00015780-RA	http://www.genome.jp/kegg-bin/show_pathway?sot04016/sot:102577619%09red	Down
Plant-pathogen interaction	KEGG PATHWAY	sot04626	1	224	0.172952	0.19766	dAg1_00018647-RA	http://www.genome.jp/kegg-bin/show_pathway?sot04626/sot:102594754%09red	Down
Biosynthesis of amino acids	KEGG PATHWAY	sot01230	1	250	0.190975	0.212195	dAg1_00012243-RA	http://www.genome.jp/kegg-bin/show_pathway?sot01230/sot:102577618%09red	Down

## Sheet: TableS7
Table S7. Summary of photosynthesis-related genes that are differentially expressed in Dalila and the methylation changes within tham, reported by Macko-Podgórni et al. 2025.
Gene ID	KEGG term	KEGG ID	GO Term	GO ID	Chromosome	Start	End	Description	DMRs*	Localization*	Methylation*
dAg1_00004711	Photosynthesis - antenna proteins	sot00196	photosynthesis, light harvesting in photosystem I;response to light stimulus	GO:0009768;GO:0009417	chr01	83148325	83199960	Protein of unknown function	Chr01_83150001_83151000	gene_body	CpG_hyper
dAg1_00004715	Photosynthesis - antenna proteins	sot00196	photosynthesis, light harvesting in photosystem I;response to light stimulus	GO:0009768;GO:0009422	chr01	83155763	83156906	Similar to CAP10B: Chlorophyll a-b binding protein CP24 10B%2C chloroplastic (Solanum lycopersicum OX%3D4081)	na	na	na
dAg1_00012264	na	na	chloroplast thylakoid membrane	GO:0009535	chr04	64848327	64854344	Similar to TL29: Thylakoid lumenal 29 kDa protein%2C chloroplastic (Arabidopsis thaliana OX%3D3702)	na	na	na
dAg1_00012445	Porphyrin and chlorophyll metabolism	sot00860	na	na	chr04	67090707	67095833	Similar to HEMA1: Glutamyl-tRNA reductase 1%2C chloroplastic (Cucumis sativus OX%3D3659)	Chr04_67097001_67098000;Chr04_67088001_67089000	upstream;downstream	CpG_hyper;CpG_hyper
dAg1_00018374	Photosynthesis - antenna proteins	sot00196	na	na	chr03	840763	866645	Similar to LHCB3: Chlorophyll a-b binding protein 3%2C chloroplastic (Arabidopsis thaliana OX%3D3702)	na	na	na
dAg1_00018375	Photosynthesis - antenna proteins	sot00196	na	na	chr03	843414	856751	Similar to LHCB7: Chlorophyll a-b binding protein 7%2C chloroplastic (Arabidopsis thaliana OX%3D3702)	na	na	na
dAg1_00018376	Photosynthesis - antenna proteins	sot00196	na	na	chr03	845856	866645	Similar to LHCB2.2: Chlorophyll a-b binding protein 2.2%2C chloroplastic (Arabidopsis thaliana OX%3D3702)	na	na	na
dAg1_00018378	Photosynthesis - antenna proteins	sot00196	na	na	chr03	850365	866645	Protein of unknown function	Chr03_852001_853000	downstream	CpG_hyper
dAg1_00018379	Photosynthesis - antenna proteins	sot00196	na	na	chr03	855871	856675	Similar to LHCA6: Photosystem I chlorophyll a/b-binding protein 6%2C chloroplastic (Arabidopsis thaliana OX%3D3702)	na	na	na
dAg1_00018380	Photosynthesis - antenna proteins	sot00196	plastoglobule;chloroplast thylakoid membrane;chloroplast envelope	GO:0010287;GO:0009535;GO:0009941	chr03	857794	858598	Similar to LHCB4.2: Chlorophyll a-b binding protein CP29.2%2C chloroplastic (Arabidopsis thaliana OX%3D3702)	Chr03_859001_860000	upstream	CpG_hypo
dAg1_00018381	Photosynthesis - antenna proteins	sot00196	plastoglobule;chloroplast thylakoid membrane;chloroplast envelope;photosynthesis, light harvesting in photosystem I;response to light stimulus	GO:0010287;GO:0009535;GO:0009941;GO:0009768;GO:0009427	chr03	861907	866645	Similar to LHCA2: Photosystem I chlorophyll a/b-binding protein 2%2C chloroplastic (Arabidopsis thaliana OX%3D3702)	na	na	na
dAg1_00018383	Photosynthesis - antenna proteins	sot00196	plastoglobule;chloroplast thylakoid membrane;chloroplast envelope;photosynthesis, light harvesting in photosystem I;response to light stimulus	GO:0010287;GO:0009535;GO:0009941;GO:0009768;GO:0009427	chr03	865662	866466	Similar to CAB2R: Chlorophyll a-b binding protein 2%2C chloroplastic (Oryza sativa subsp. japonica OX%3D39947)	na	na	na
dAg1_00018773	Photosynthesis - antenna proteins	sot00196	plastoglobule;chloroplast thylakoid membrane;chloroplast envelope;photosynthesis, light harvesting in photosystem I;response to light stimulus	GO:0010287;GO:0009535;GO:0009941;GO:0009768;GO:0009427	chr03	5080750	5081554	Similar to Chlorophyll a-b binding protein of LHCII type I%2C chloroplastic (Fragment) (Cucumis sativus OX%3D3659)	na	na	na
dAg1_00021291	Photosynthesis	sot00195	na	na	chr03	53835480	53841931	Similar to PPL1: PsbP-like protein 1%2C chloroplastic (Arabidopsis thaliana OX%3D3702)	Chr03_53843001_53844000	downstream	CpG_hypo
dAg1_00021387	Photosynthesis - antenna proteins	sot00196	na	na	chr03	54620849	54709730	Similar to LHCA4: Chlorophyll a-b binding protein 4%2C chloroplastic (Arabidopsis thaliana OX%3D3702)	na	na	na
dAg1_00021393	Porphyrin and chlorophyll metabolism	sot00860	chloroplast thylakoid membrane	GO:0009535	chr03	54664881	54666276	Similar to CHLP: Geranylgeranyl diphosphate reductase%2C chloroplastic (Arabidopsis thaliana OX%3D3702)	na	na	na
dAg1_00022456	Porphyrin and chlorophyll metabolism	sot00860	na	na	chr10	1827493	1831292	Similar to PORA: Protochlorophyllide reductase A%2C chloroplastic (Arabidopsis thaliana OX%3D3702)	Chr10_1826001_1827000;Chr10_1827001_1828000	upstream;gene_body	CHG_hyper;CHG_hyper
dAg1_00024869	na	na	chloroplast thylakoid membrane	GO:0009535	chr10	53910175	53912522	Protein of unknown function	Chr10_53910001_53911000	gene_body	CpG_hyper
dAg1_00026022	Photosynthesis - antenna proteins	sot00196	plastoglobule;chloroplast thylakoid membrane;chloroplast envelope;photosynthesis, light harvesting in photosystem I;response to light stimulus	GO:0010287;GO:0009535;GO:0009941;GO:0009768;GO:0009427	chr12	6403358	6405040	Similar to LHCB2.1: Chlorophyll a-b binding protein 2.1%2C chloroplastic (Arabidopsis thaliana OX%3D3702)	na	na	na
dAg1_00031836	Photosynthesis - antenna proteins	sot00196	photosynthesis, light harvesting in photosystem I;response to light stimulus	GO:0009768;GO:0009424	chr05	56222969	56293215	Protein of unknown function	na	na	na
dAg1_00031838	Photosynthesis - antenna proteins	sot00196	photosynthesis, light harvesting in photosystem I;response to light stimulus	GO:0009768;GO:0009421	chr05	56302780	56376356	Similar to LHCA1: Chlorophyll a-b binding protein 6%2C chloroplastic (Arabidopsis thaliana OX%3D3702)	na	na	na
dAg1_00032982	na	na	chloroplast envelope	GO:0009941	chr06	26998065	27005514	Similar to RPL3A: 50S ribosomal protein L3-1%2C chloroplastic (Arabidopsis thaliana OX%3D3702)	na	na	na
dAg1_00033706	Porphyrin and chlorophyll metabolism	sot00860	na	na	chr06	40292820	40298399	Similar to CAO: Chlorophyllide a oxygenase%2C chloroplastic (Arabidopsis thaliana OX%3D3702)	na	na	na
dAg1_00034464	Photosynthesis - antenna proteins	sot00196	photosynthesis, light harvesting in photosystem I;response to light stimulus	GO:0009768;GO:0009426	chr06	48371992	48372973	Similar to LHCA4: Chlorophyll a-b binding protein 4%2C chloroplastic (Arabidopsis thaliana OX%3D3702)	na	na	na
dAg1_00035158	Photosynthesis	sot00195	na	na	chr06	54398742	54399925	Similar to PSAE2: Photosystem I reaction center subunit IV B%2C chloroplastic (Arabidopsis thaliana OX%3D3702)	na	na	na
dAg1_00035243	Photosynthesis	sot00195	na	na	chr06	55052716	55152375	Similar to PSAE2: Photosystem I reaction center subunit IV B%2C chloroplastic (Arabidopsis thaliana OX%3D3702)	na	na	na
dAg1_00036665	Porphyrin and chlorophyll metabolism	sot00860	na	na	chr11	13476431	13481439	Similar to CAO: Chlorophyllide a oxygenase%2C chloroplastic (Arabidopsis thaliana OX%3D3702)	Chr11_13476001_13477000	gene_body	CHG_hypo
dAg1_00039751	na	na	chloroplast thylakoid membrane	GO:0009535	chr07	35634291	35637684	Similar to PRXQ: Peroxiredoxin Q%2C chloroplastic (Arabidopsis thaliana OX%3D3702)	na	na	na
dAg1_00040474	Porphyrin and chlorophyll metabolism	sot00860	na	na	chr07	45561956	45564983	Similar to POR1: Protochlorophyllide reductase%2C chloroplastic (Daucus carota OX%3D4039)	na	na	na
dAg1_00042723	Photosynthesis	sot00195	na	na	chr02	31927199	31931381	Similar to PSAF: Photosystem I reaction center subunit III%2C chloroplastic (Arabidopsis thaliana OX%3D3702)	na	na	na
dAg1_00042889	Photosynthesis - antenna proteins	sot00196	na	na	chr02	33510492	33513909	Similar to Chlorophyll a-b binding protein of LHCII type I%2C chloroplastic (Fragment) (Cucumis sativus OX%3D3659)	na	na	na
dAg1_00042906	Photosynthesis - antenna proteins	sot00196	na	na	chr02	33638091	33652406	Protein of unknown function	na	na	na
dAg1_00042908	Photosynthesis - antenna proteins	sot00196	plastoglobule;chloroplast thylakoid membrane;chloroplast envelope;photosynthesis, light harvesting in photosystem I;response to light stimulus	GO:0010287;GO:0009535;GO:0009941;GO:0009768;GO:0009427	chr02	33644703	33645501	Similar to LHCB7: Chlorophyll a-b binding protein 7%2C chloroplastic (Arabidopsis thaliana OX%3D3702)	Chr02_33643001_33644000	upstream	CHH_hypo
dAg1_00042909	Photosynthesis - antenna proteins	sot00196	plastoglobule;chloroplast thylakoid membrane;chloroplast envelope;photosynthesis, light harvesting in photosystem I;response to light stimulus	GO:0010287;GO:0009535;GO:0009941;GO:0009768;GO:0009427	chr02	33651540	33652338	Similar to Chlorophyll a-b binding protein of LHCII type I%2C chloroplastic (Fragment) (Cucumis sativus OX%3D3659)	na	na	na
dAg1_00042910	Photosynthesis - antenna proteins	sot00196	na	na	chr02	33635789	33660269	Similar to LHCB3: Chlorophyll a-b binding protein 3%2C chloroplastic (Arabidopsis thaliana OX%3D3702)	na	na	na
* results from Macko-Podgórni et al. 2025
