# Supplementary material for: Physiological and molecular insights into drought-induced memory in potato leaves
Source: Research Square preprint supplement (doi:10.21203/rs.3.rs-6670849/v1), 2025-06-13
Supplement: Supplementary file 2 [file c6365c31b0f4831d8151fe19.docx]

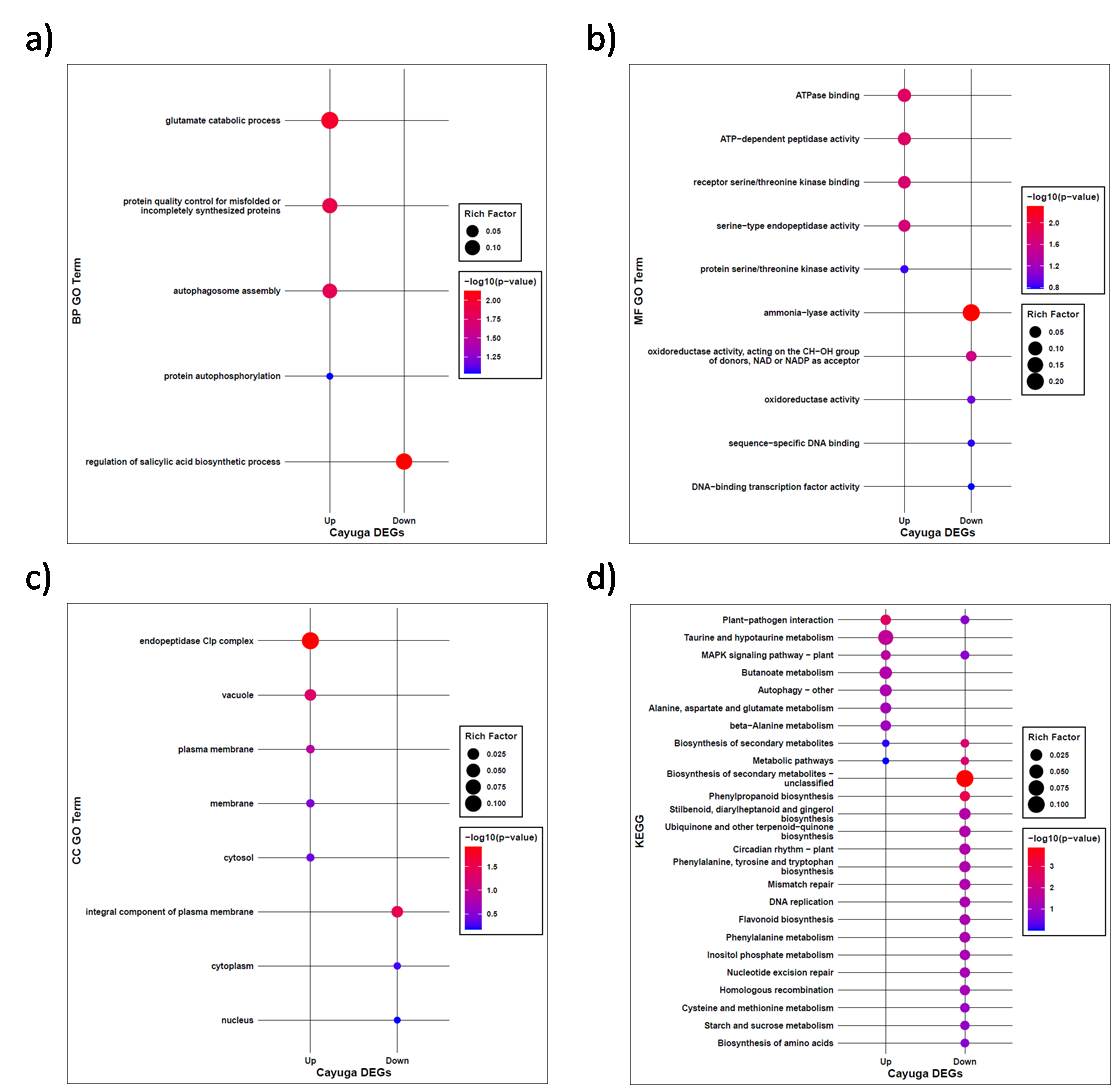


**Fig. S1. Enrichment of Cayuga DEGs in (a) GO biological processes (BP), (b) GO molecular function (MF), (c) GO cellular component (CC) categories, and (d) KEGG pathways.**


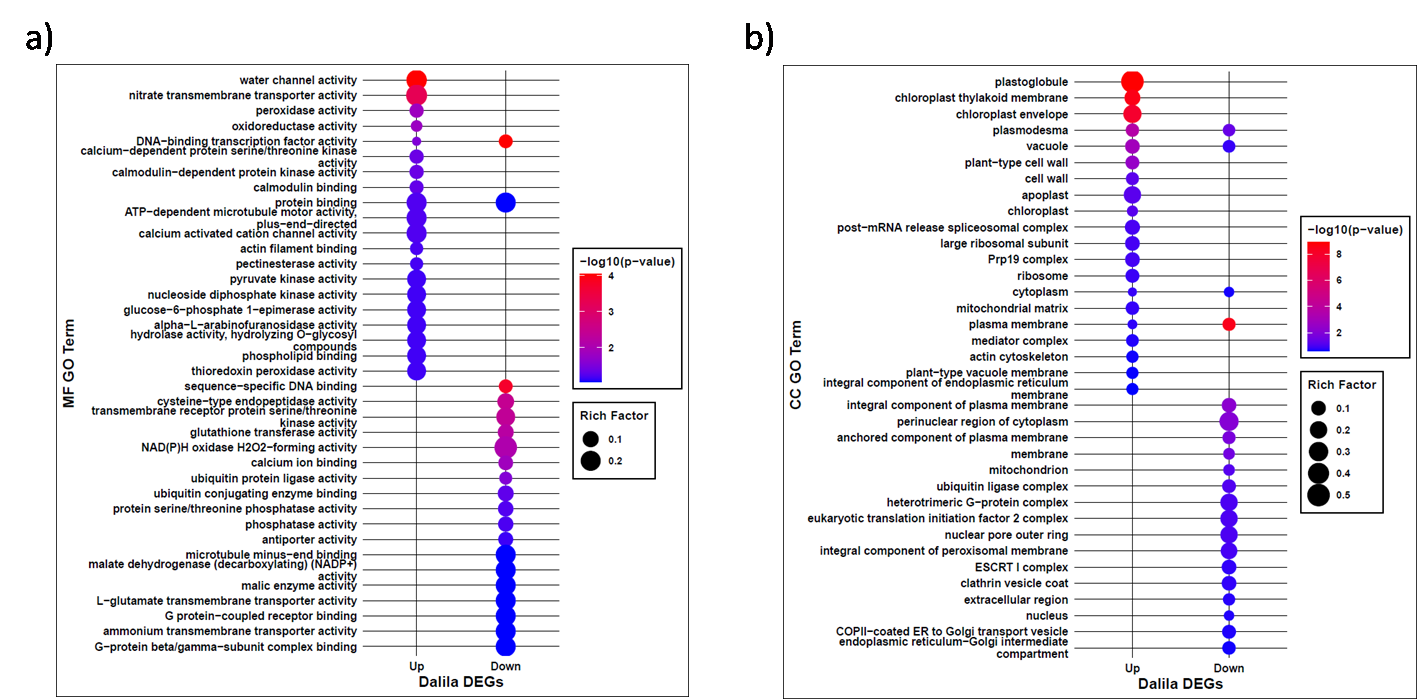


**Fig. S2. Enrichment of Dalila DEGs in (a) GO molecular function (MF) and (b) GO cellular component (CC) categories.**
